# Supplementary material for: Ion Flux in Roots of Chinese Fir (Cunninghamia lanceolata (Lamb.) Hook) under Aluminum Stress
Source: PLoS One. 2016 Jun 6;11(6):e0156832. doi: 10.1371/journal.pone.0156832 (PMC4894599; doi:10.1371/journal.pone.0156832)
Supplement: S1 Table — (XLSX) [file pone.0156832.s002.xlsx]

## Sheet: H+
0-1h-1
	240.633	0.305176	4.67833	2.7916
	240.386	0.457764	6.95302
	240.155	0.457764	6.89329
	239.785	0.305176	4.53247
	239.569	0.610352	8.99203
	239.292	0.305176	4.44977
	239.091	0.457764	6.6247
	238.829	0.610352	8.74689
	238.614	0.610352	8.67693
	238.352	0.610352	8.59243
	238.136	0.457764	6.39256
	237.889	0.457764	6.33385
	237.658	0.305176	4.18631
	237.458	0.457764	6.2327
	237.273	0.457764	6.18978
	237.104	0.457764	6.15083
	236.918	0.610352	8.1443
	236.703	0.610352	8.07916
	236.502	0.610352	8.01873
	236.271	0.305176	3.97495
	236.087	0.457764	5.92156
	235.917	0.457764	5.88408
	235.763	0.457764	5.85033
	235.562	0.457764	5.80657
	235.378	0.457764	5.7668
	235.223	0.457764	5.73351
	235.069	0.457764	5.70063
	234.9	0.305176	3.77652
	234.715	0.152588	1.87526
	234.545	0.305176	3.72677
	234.406	0.610352	7.41489
	234.206	0.152588	1.83995
	234.083	0.305176	3.66301
	233.975	0.457764	5.47238
	233.79	0.305176	3.62314
	233.651	0.762939	9.01084
	233.482	0.610352	7.16335
	233.328	0.305176	3.56116
	233.204	0.305176	3.5447
	233.081	0.610352	7.05685
	232.927	0.610352	7.01638
	232.742	0.610352	6.96806
	232.557	0.305176	3.46006
	232.064	0.305176	3.39693
	231.848	-0.305176	-3.36968
	231.756	-0.305176	-3.35812
	231.664	0.305176	3.34656
	231.509	0.152588	1.66362
	231.186	0.152588	1.64367
	231.062	0.305176	3.27215
	230.877	0.152588	1.62481
	230.6	0.152588	1.60809
	230.291	0.152588	1.58963
	229.86	-0.305176	-3.12853
	229.768	0.305176	3.11775
	229.46	-0.457764	-4.62322
	229.429	0.152588	1.53927
	229.244	0.152588	1.52867
	229.121	0.610352	6.08658
	228.92	0.152588	1.51028
	228.535	-0.305176	-2.97746
	228.443	-0.305176	-2.96725
	228.35	0.152588	1.47846
	228.226	-0.152588	-1.47164
	228.072	-0.152588	-1.4632
	227.857	-0.457764	-4.35453
	227.764	-0.457764	-4.33943
	227.656	0.152588	1.44063
	227.456	-0.610352	-5.71974
	227.271	0.152588	1.42006
	227.009	-0.152588	-1.40624
	226.84	0.305176	2.79476
	226.67	0.152588	1.38854
	226.562	1.98364	17.9775
	226.316	0.305176	2.74059
	226.192	1.06812	9.54761
	225.946	0.762939	6.75736
	225.715	0.610352	5.35947
	225.514	0.457764	3.98955
	225.267	0.152588	1.31765
	225.021	-0.457764	-3.91684
	224.959	-0.610352	-5.2104
	224.867	-0.305176	-2.59624
	224.775	-0.152588	-1.29366
	224.667	-0.305176	-2.57692
	224.513	-0.762939	-6.40541
	224.451	-0.152588	-1.2781
	224.328	-0.610352	-5.08903
	224.266	-0.610352	-5.07726
	224.205	-0.610352	-5.0657
	224.143	-0.305176	-2.52697
	224.051	-0.457764	-3.77747
0-1h-2
	Origin(1)mV	Origin-X(1)uV
	261.408	-7.93457	-264.334	-230.687
	261.547	-7.32422	-245.267
	261.577	-7.47681	-250.659
	261.624	-8.23975	-276.726
	261.593	-7.93457	-266.167
	261.639	-8.8501	-297.395
	261.839	-7.78198	-263.457
	261.994	-8.23975	-280.577
	262.225	-7.01904	-241.074
	261.592	-8.8501	-296.874
	261.346	-7.17163	-238.36
	261.392	-8.08716	-269.257
	261.331	-8.54492	-283.854
	261.408	-8.08716	-269.418
	261.485	-7.62939	-254.897
	261.469	-7.17163	-239.458
	261.655	-8.23975	-277.047
	261.731	-7.62939	-257.25
	261.685	-7.62939	-256.809
	261.655	-7.78198	-261.653
	261.747	-7.47681	-252.255
	261.809	-7.78198	-263.162
	261.901	-6.71387	-227.818
	261.854	-6.86646	-232.588
	261.824	-7.78198	-263.309
	261.947	-7.01904	-238.584
	261.962	-6.56128	-223.147
	261.885	-6.56128	-222.506
	261.823	-6.2561	-211.665
	261.685	-5.79834	-195.166
	261.485	-7.01904	-234.502
	261.516	-7.01904	-234.774
	261.484	-6.71387	-224.297
	261.392	-6.71387	-223.527
	261.3	-6.40869	-212.633
	261.192	-7.01904	-231.95
	261.146	-7.17163	-236.586
	261.193	-7.93457	-262.22
	261.408	-7.32422	-243.997
	261.454	-6.71387	-224.046
	261.407	-6.71387	-223.653
	261.362	-7.32422	-243.578
	261.47	-7.17163	-239.467
	261.577	-6.71387	-225.077
	261.562	-6.10352	-204.498
	261.469	-5.95093	-198.694
	261.346	-6.2561	-207.927
	261.254	-6.86646	-227.433
	261.331	-6.56128	-217.949
	261.393	-7.47681	-248.942
	261.593	-6.86646	-230.331
	261.608	-6.2561	-209.972
	261.531	-6.10352	-204.262
	261.454	-6.56128	-218.953
	261.408	-7.01904	-233.829
	261.485	-6.10352	-203.911
	261.485	-6.56128	-219.206
	261.469	-6.2561	-208.884
	261.345	-5.79834	-192.704
	261.161	-6.40869	-211.532
	261.13	-6.56128	-216.319
	261.208	-7.01904	-232.089
	261.3	-6.71387	-222.761
	261.377	-6.86646	-228.48
	261.454	-5.95093	-198.582
	261.422	-5.64575	-188.172
	261.222	-5.64575	-186.772
	261.068	-5.64575	-185.7
	260.914	-6.2561	-204.599
	260.9	-7.32422	-239.411
	261.116	-8.23975	-271.525
	261.439	-7.47681	-249.37
	261.638	-6.71387	-225.591
	261.577	-6.10352	-204.613
	261.484	-5.95093	-198.805
	261.361	-6.56128	-218.194
	261.377	-5.79834	-192.934
	261.284	-5.18799	-172.024
	261.006	-6.10352	-200.295
	260.853	-5.79834	-189.195
	260.73	-6.71387	-218.068
	260.73	-7.01904	-227.982
	260.853	-6.56128	-214.092
	260.883	-6.71387	-219.318
	261.054	-6.56128	-215.706
	261.146	-6.2561	-206.379
	261.13	-7.17163	-236.445
	261.208	-6.56128	-216.95
0-1h-3
	268.775	-2.13623	-93.6967	-67.8767
	268.882	-1.98364	-87.3521
	268.913	-2.13623	-94.1809
	268.944	-2.13623	-94.29
	269.021	-2.44141	-108.071
	269.16	-2.44141	-108.634
	269.267	-2.28882	-102.252
	269.299	-1.83105	-81.898
	269.329	-1.67847	-75.1574
	269.375	-2.13623	-95.8202
	269.376	-1.67847	-75.2895
	269.437	-2.28882	-102.903
	269.499	-1.98364	-89.3886
	269.499	-1.98364	-89.3886
	269.545	-1.98364	-89.5423
	269.545	-1.83105	-82.654
	269.545	-1.83105	-82.654
	269.499	-1.37329	-61.8836
	269.468	-1.52588	-68.6803
	269.452	-1.83105	-82.3674
	269.452	-1.98364	-89.2318
	269.483	-1.98364	-89.3352
	269.514	-1.83105	-82.5584
	269.499	-1.52588	-68.7598
	269.483	-1.83105	-82.4628
	269.53	-2.13623	-96.3766
	269.545	-2.13623	-96.4306
	269.607	-1.98364	-89.7499
	269.637	-1.98364	-89.8505
	269.668	-1.83105	-83.0346
	269.684	-1.67847	-76.1607
	269.699	-1.67847	-76.2033
	269.715	-1.67847	-76.2489
	269.73	-1.67847	-76.2916
	269.73	-1.52588	-69.3557
	269.73	-1.52588	-69.3557
	269.684	-1.67847	-76.1607
	269.668	-2.13623	-96.8747
	269.699	-1.98364	-90.0588
	269.668	-1.67847	-76.1152
	269.668	-1.98364	-89.9546
	269.73	-1.67847	-76.2916
	269.761	-1.67847	-76.38
	269.792	-1.52588	-69.5165
	269.807	-1.52588	-69.5555
	269.822	-1.52588	-69.5944
	269.853	-1.2207	-55.7395
	269.884	-1.83105	-83.7073
	269.931	-1.67847	-76.8666
	269.992	-1.83105	-84.0456
	270.038	-1.52588	-70.1582
	270.1	-1.06812	-49.2243
	270.161	-1.2207	-56.3844
	270.208	-1.2207	-56.4835
	270.223	-0.762939	-35.3217
	270.223	-0.762939	-35.3217
	270.192	-0.762939	-35.2808
	270.208	-1.06812	-49.4232
	270.238	-1.2207	-56.5468
	270.284	-0.915527	-42.4828
	270.254	-1.06812	-49.5082
	270.269	-0.762939	-35.3824
	270.269	-0.762939	-35.3824
	270.3	-0.762939	-35.4234
	270.054	-1.37329	-63.1798
	269.807	-1.52588	-69.5555
	269.853	-1.52588	-69.6751
	269.899	-1.2207	-55.8353
	269.915	-0.915527	-41.9013
	269.899	-0.762939	-34.8968
	269.899	-0.762939	-34.8968
	269.899	-0.762939	-34.8968
	269.899	-0.457764	-20.9379
	269.884	-0.762939	-34.8772
	269.853	-0.610352	-27.8694
	269.853	-0.762939	-34.8369
	269.822	-0.610352	-27.8372
	269.791	-0.762939	-34.7563
	269.745	-0.610352	-27.7572
	269.714	-0.915527	-41.5879
	269.668	-0.762939	-34.597
	269.622	-1.2207	-55.2606
	269.591	-1.37329	-62.0966
	269.56	-1.67847	-75.8087
	269.545	-1.67847	-75.7663
0-1h-4
	266.678	0.762939	30.94	9.63059
	266.694	0.610352	24.7669
	266.694	0.457764	18.5752
	266.71	0.457764	18.5863
	266.755	0.305176	12.4118
	266.74	0.457764	18.6072
	266.817	0.152588	6.2203
	266.879	0.457764	18.704
	266.91	0.152588	6.24194
	266.941	0.305176	12.4983
	267.018	0.305176	12.5343
	267.048	-0.152588	-6.27425
	267.079	0.152588	6.28147
	267.11	0.305176	12.5775
	267.31	0.152588	6.3359
	267.341	0.457764	19.0296
	267.341	0.305176	12.6864
	267.341	0.457764	19.0296
	267.357	0.152588	6.34704
	267.341	0.610352	25.3727
	267.326	0.457764	19.0189
	267.31	0.457764	19.0076
	267.28	0.152588	6.32881
	267.264	0.152588	6.32503
	267.218	0.305176	12.6283
	267.187	0.305176	12.6137
	267.141	0.305176	12.592
	267.141	0.152588	6.29603
	267.094	0.152588	6.28499
	267.079	0.152588	6.28147
	267.048	-0.152588	-6.27425
	267.033	0.305176	12.5413
	266.987	0.152588	6.25992
	266.987	-0.152588	-6.25997
	266.987	-0.152588	-6.25997
	266.972	0.152588	6.25642
	266.987	0.305176	12.5198
	266.987	0.152588	6.25992
	266.971	0.305176	12.5123
	266.925	0.152588	6.24544
	266.909	-0.152588	-6.24176
	266.925	0.152588	6.24544
	266.925	0.152588	6.24544
	266.91	0.152588	6.24194
	266.925	0.152588	6.24544
	266.925	0.152588	6.24544
	266.91	0.152588	6.24194
	266.925	0.152588	6.24544
	266.91	0.457764	18.7257
	266.925	0.305176	12.4908
	266.894	0.305176	12.4764
	266.863	0.152588	6.231
	266.879	0.152588	6.23472
	266.863	-0.152588	-6.23104
	266.879	-0.305176	-12.4696
	266.894	0.152588	6.23822
	266.863	0.152588	6.231
	266.848	0.305176	12.455
	266.848	0.152588	6.22751
	266.817	0.152588	6.2203
	266.832	0.152588	6.22379
	266.817	0.152588	6.2203
	266.848	0.305176	12.455
	266.832	0.305176	12.4475
	266.817	0.457764	18.6608
	266.786	0.152588	6.2131
	266.802	0.305176	12.4336
	266.802	0.152588	6.21682
	266.802	0.152588	6.21682
	266.802	0.152588	6.21682
	266.802	0.457764	18.6503
	266.771	0.152588	6.20962
	266.755	0.305176	12.4118
	266.709	0.305176	12.3905
	266.725	0.305176	12.3979
	266.709	0.305176	12.3905
	266.694	0.610352	24.7669
	266.694	0.305176	12.3835
	266.694	0.305176	12.3835
	266.678	0.152588	6.18809
	266.663	0.305176	12.3692
	266.663	0.305176	12.3692
	266.617	0.152588	6.174
0-1h-5
	264.752	-3.35693	-126.698	-170.422
	264.597	-3.50952	-131.693
	264.459	-3.8147	-142.41
	264.351	-3.35693	-124.815
	264.243	-4.27246	-158.219
	264.197	-4.42505	-163.589
	264.182	-4.42505	-163.498
	264.197	-4.73022	-174.872
	264.259	-5.0354	-186.587
	264.336	-5.0354	-187.125
	264.475	-5.49316	-205.201
	264.614	-5.18799	-194.808
	264.783	-5.18799	-196.042
	264.953	-5.34058	-203.094
	265.107	-5.34058	-204.266
	265.261	-5.0354	-193.703
	265.461	-5.18799	-201.07
	265.616	-5.18799	-202.238
	265.785	-5.95093	-233.452
	265.924	-5.34058	-210.595
	266.078	-5.49316	-217.863
	266.248	-4.88281	-194.886
	266.386	-5.34058	-214.261
	266.525	-4.73022	-190.759
	266.648	-5.18799	-210.185
	266.741	-5.18799	-210.917
	266.833	-4.73022	-192.966
	266.91	-4.88281	-199.765
	266.956	-4.73022	-193.855
	267.018	-4.73022	-194.304
	267.064	-4.42505	-182.08
	267.11	-4.27246	-176.103
	267.126	-4.27246	-176.208
	267.172	-4.73022	-195.425
	267.187	-4.57764	-189.227
	267.249	-4.57764	-189.665
	267.264	-4.57764	-189.772
	267.31	-4.57764	-190.098
	267.31	-4.27246	-177.423
	267.356	-4.73022	-196.773
	267.341	-4.27246	-177.629
	267.372	-4.11987	-171.483
	267.326	-4.27246	-177.53
	267.356	-4.11987	-171.38
	267.341	-4.27246	-177.629
	267.326	-4.11987	-171.188
	267.295	-4.57764	-189.992
	267.264	-4.57764	-189.772
	267.295	-4.11987	-170.99
	267.28	-4.42505	-183.555
	267.31	-4.11987	-171.086
	267.31	-4.27246	-177.423
	267.31	-4.11987	-171.086
	267.326	-4.11987	-171.188
	267.341	-4.27246	-177.629
	267.341	-3.8147	-158.596
	267.326	-4.11987	-171.188
	267.326	-4.11987	-171.188
	267.341	-4.11987	-171.284
	267.326	-4.11987	-171.188
	267.341	-3.96729	-164.94
	267.341	-4.11987	-171.284
	267.341	-3.66211	-152.251
	267.372	-3.8147	-158.78
	267.357	-3.96729	-165.039
	267.356	-4.11987	-171.38
	267.356	-3.8147	-158.685
	267.341	-3.96729	-164.94
	267.372	-3.96729	-165.131
	267.357	-3.96729	-165.039
	267.357	-4.11987	-171.387
	267.372	-3.8147	-158.78
	267.372	-3.96729	-165.131
	267.356	-3.96729	-165.033
	267.387	-3.8147	-158.869
	267.341	-3.50952	-145.907
	267.357	-4.11987	-171.387
	267.387	-3.8147	-158.869
	267.388	-3.66211	-152.519
	267.403	-3.8147	-158.964
	267.449	-3.96729	-165.607
	267.45	-3.8147	-159.243
	267.511	-3.96729	-165.991
	267.541	-3.96729	-166.177
	267.572	-3.66211	-153.571
	267.588	-3.50952	-147.259
	267.619	-3.50952	-147.43
	267.634	-3.35693	-141.098
	267.68	-3.66211	-154.191
	267.665	-3.35693	-141.262
	267.726	-3.20435	-135.148
	267.711	-3.50952	-147.937
	267.711	-3.35693	-141.505
	267.711	-3.20435	-135.073
	267.681	-3.05176	-128.496
	267.696	-3.20435	-134.997
	267.726	-3.20435	-135.148
	267.726	-3.66211	-154.457
	267.696	-3.20435	-134.997
	267.727	-3.20435	-135.153
	267.726	-3.05176	-128.712
	267.68	-3.20435	-134.916
	267.665	-3.35693	-141.262
0-1h-6
	Origin(1)mV	Origin-X(1)uV
	278.514	4.11987	259.944	206.998
	278.437	3.8147	240
	278.483	3.50952	221.181
	278.483	2.89917	182.717
	278.514	3.35693	211.81
	278.545	3.05176	192.779
	278.591	3.8147	241.384
	278.53	3.96729	250.467
	278.468	4.11987	259.498
	278.391	3.20435	201.257
	278.36	3.50952	220.167
	278.345	3.20435	200.911
	278.375	3.20435	201.136
	278.376	2.74658	172.41
	278.453	2.74658	172.907
	278.53	3.20435	202.304
	278.607	2.59399	164.244
	278.638	2.59399	164.434
	278.669	2.74658	174.308
	278.761	2.74658	174.908
	278.823	3.35693	214.269
	278.915	2.59399	166.144
	278.931	3.20435	205.357
	278.931	2.74658	176.022
	278.977	3.05176	195.915
	278.931	3.35693	215.135
	278.977	3.05176	195.915
	278.962	3.35693	215.384
	279.007	2.89917	186.329
	279.023	3.05176	196.252
	278.992	3.35693	215.625
	278.946	2.74658	176.121
	278.961	3.05176	195.798
	278.992	2.74658	176.423
	279.054	2.74658	176.832
	279.069	3.20435	206.418
	279.069	2.89917	186.761
	279.1	3.05176	196.817
	279.131	2.89917	187.194
	279.162	3.05176	197.274
	279.177	3.50952	226.989
	279.162	3.35693	216.999
	279.162	2.89917	187.41
	279.177	3.20435	207.253
	279.131	3.20435	206.897
	279.115	3.20435	206.773
	279.1	3.20435	206.657
	279.1	3.20435	206.657
	279.116	3.20435	206.781
	279.146	3.20435	207.013
	279.162	3.35693	216.999
	279.162	3.20435	207.137
	279.192	3.20435	207.369
	279.207	3.05176	197.605
	279.177	3.05176	197.384
	279.177	2.89917	187.515
	279.177	3.20435	207.253
	279.146	2.89917	187.298
	279.192	3.20435	207.369
	279.162	3.05176	197.274
	279.131	3.20435	206.897
	279.146	3.66211	236.583
	279.084	3.8147	245.87
	279.038	3.8147	245.448
	279.007	3.50952	225.552
	278.931	3.35693	215.135
	278.931	3.50952	224.913
	278.915	2.89917	185.689
	278.9	3.20435	205.119
	278.915	3.20435	205.234
	278.9	3.50952	224.653
	278.915	3.05176	195.462
	278.869	3.20435	204.882
	278.885	3.8147	244.049
	278.884	3.50952	224.518
	278.854	3.20435	204.767
	278.838	3.35693	214.389
	278.868	3.35693	214.629
	278.823	3.35693	214.269
	278.792	3.66211	233.476
	278.792	3.35693	214.021
	278.792	3.35693	214.021
	278.761	3.20435	204.057
	278.776	3.05176	194.45
	278.761	3.50952	223.489
	278.73	3.20435	203.821
	278.73	3.35693	213.526
	278.715	3.20435	203.707
	278.746	3.35693	213.653
	278.73	3.20435	203.821
	278.715	3.50952	223.106
	278.7	3.35693	213.286
	278.715	3.50952	223.106
	278.669	3.20435	203.357
	278.668	3.35693	213.032
	278.622	3.35693	212.666
	278.637	3.35693	212.785
	278.607	3.20435	202.887
	278.638	3.50952	222.465
	278.668	3.20435	203.35
	278.622	3.35693	212.666
	278.607	3.50952	222.207
	278.591	3.35693	212.42
0-1h-7
	Origin(1)mV	Origin-X(1)uV
	268.851	-5.0354	-221.499	-209.993
	268.743	-5.0354	-220.608
	268.589	-4.42505	-192.753
	268.45	-5.0354	-218.206
	268.281	-5.18799	-223.405
	268.127	-4.88281	-209.056
	267.973	-5.79834	-246.835
	267.957	-5.18799	-220.718
	267.834	-5.0354	-213.243
	267.695	-5.0354	-212.139
	267.556	-5.18799	-217.436
	267.402	-5.0354	-209.83
	267.187	-5.18799	-214.46
	267.032	-5.64575	-232.038
	266.894	-5.49316	-224.605
	266.755	-5.49316	-223.442
	266.601	-5.79834	-234.504
	266.494	-5.79834	-233.569
	266.431	-5.64575	-226.887
	266.309	-5.34058	-213.646
	266.185	-5.49316	-218.735
	266.015	-5.95093	-235.466
	265.954	-6.10352	-240.955
	265.877	-5.95093	-234.255
	265.769	-5.18799	-203.397
	264.089	-7.62939	-280.936
	264.043	-7.17163	-263.623
	264.028	-7.17163	-263.476
	264.043	-6.86646	-252.404
	264.058	-6.2561	-230.093
	264.028	-6.10352	-224.229
	263.981	-6.10352	-223.836
	263.997	-5.79834	-212.77
	263.997	-5.95093	-218.37
	263.997	-5.34058	-195.97
	263.951	-5.49316	-201.224
	263.904	-5.34058	-195.291
	263.812	-5.64575	-205.743
	263.812	-5.34058	-194.621
	263.781	-5.34058	-194.395
	263.781	-4.88281	-177.731
	263.75	-5.0354	-183.074
	263.673	-5.49316	-199.145
	263.627	-4.88281	-176.711
	263.58	-5.34058	-192.941
	263.504	-5.49316	-197.892
	263.457	-5.34058	-192.057
	263.426	-5.49316	-197.316
	263.411	-5.18799	-186.249
	263.365	-5.18799	-185.929
	263.303	-5.18799	-185.499
	263.195	-5.64575	-201.056
	263.118	-5.79834	-205.897
	263.087	-5.95093	-211.072
	263.026	-5.49316	-194.39
	262.995	-5.95093	-210.348
	262.949	-6.10352	-215.372
	262.856	-5.95093	-209.259
	262.841	-6.10352	-214.505
	262.81	-6.10352	-214.257
	262.795	-5.79834	-203.428
	262.748	-5.95093	-208.416
	262.733	-5.64575	-197.616
	262.687	-5.95093	-207.942
	262.656	-5.64575	-197.048
	262.61	-6.10352	-212.662
	262.579	-6.10352	-212.416
	262.548	-6.10352	-212.17
	262.486	-6.56128	-227.558
	262.347	-7.01904	-242.176
	262.255	-7.32422	-251.84
	262.209	-7.78198	-267.123
	262.256	-7.17163	-246.602
	262.301	-7.01904	-241.76
	262.286	-6.86646	-236.371
	262.271	-6.56128	-225.737
	262.271	-5.95093	-204.736
	262.302	-6.2561	-215.486
	262.302	-6.10352	-210.23
	262.302	-5.79834	-199.716
	262.301	-5.64575	-194.453
	262.255	-5.64575	-194.119
	262.178	-5.34058	-183.098
	262.132	-5.79834	-198.452
	262.116	-5.79834	-198.334
	262.024	-5.95093	-202.856
	261.947	-6.10352	-207.46
	261.886	-5.95093	-201.813
	261.855	-5.79834	-196.41
	261.824	-5.95093	-201.346
	261.793	-6.2561	-211.428
	261.762	-5.79834	-195.729
	261.731	-5.95093	-200.648
	261.654	-6.56128	-220.595
	261.654	-6.40869	-215.464
	261.593	-6.2561	-209.854
	261.546	-6.56128	-219.707
	261.531	-6.56128	-219.583
	261.546	-6.10352	-204.376
	261.5	-6.2561	-209.126
	261.485	-6.2561	-209.009
	261.454	-6.10352	-203.675
	261.423	-5.95093	-198.353
	261.361	-6.10352	-202.969
	261.284	-6.40869	-212.506
	261.176	-6.56128	-216.691
	261.099	-7.01904	-231.146
	261.022	-6.86646	-225.471
	260.976	-6.56128	-215.078
	260.945	-6.2561	-204.836
	260.945	-6.10352	-199.839
	260.914	-5.79834	-189.626
	260.884	-5.79834	-189.414
	260.853	-5.64575	-184.215
	260.776	-5.64575	-183.686
	260.73	-5.64575	-183.371
	260.714	-5.18799	-168.4
	260.652	-5.0354	-163.069
	260.576	-5.0354	-162.606
	260.575	-4.88281	-157.672
	260.483	-4.73022	-152.221
0-1h-8
	Origin(1)mV	Origin-X(1)uV
	266.663	1.52588	61.8442	43.1244
	266.524	1.2207	49.2194
	266.401	1.37329	55.1179
	266.293	1.06812	42.6974
	266.216	1.06812	42.5748
	266.154	1.2207	48.5438
	266.031	1.06812	42.2816
	265.97	1.2207	48.2113
	265.908	1.06812	42.0878
	265.846	1.06812	41.9904
	265.784	1.06812	41.8933
	265.692	0.915527	35.7853
	265.63	0.915527	35.7025
	265.569	1.06812	41.5582
	265.507	1.06812	41.4621
	265.43	0.915527	35.4368
	265.353	1.06812	41.2243
	265.291	1.06812	41.1289
	265.245	1.06812	41.0583
	265.153	1.06812	40.9175
	265.122	1.06812	40.8701
	265.076	1.06812	40.8
	264.998	0.915527	34.8696
	264.952	1.2207	46.4126
	264.875	1.2207	46.2793
	264.813	0.915527	34.6295
	264.736	1.2207	46.0396
	264.675	1.2207	45.9348
	264.598	1.2207	45.8029
	264.521	1.06812	39.9629
	264.49	0.915527	34.2142
	264.413	1.37329	51.1733
	264.366	1.2207	45.4077
	264.29	1.06812	39.6195
	264.228	1.52588	56.4676
	264.151	1.2207	45.0445
	264.12	1.2207	44.9924
	264.074	1.37329	50.5295
	264.012	1.37329	50.4126
	263.966	1.06812	39.143
	263.935	1.06812	39.0977
	263.874	1.2207	44.5809
	263.873	1.2207	44.5792
	263.796	1.06812	38.8952
	263.735	0.915527	33.2628
	263.673	1.2207	44.2474
	263.642	1.37329	49.7207
	263.581	1.2207	44.0956
	263.534	1.2207	44.0183
	263.488	1.2207	43.9427
	263.442	1.06812	38.3843
	263.412	1.37329	49.2953
	263.396	1.2207	43.792
	263.365	1.2207	43.7413
	263.334	1.2207	43.6907
	263.334	1.2207	43.6907
	263.303	1.37329	49.095
	263.257	1.2207	43.5652
	263.241	1.06812	38.0972
	263.211	1.37329	48.9266
	263.18	1.52588	54.2999
	263.165	1.2207	43.4158
	263.118	1.37329	48.757
	263.103	1.2207	43.3153
	263.057	1.67847	59.456
	263.026	1.52588	53.9885
	262.964	1.2207	43.091
	262.933	1.06812	37.6614
	262.887	1.2207	42.9673
	262.872	1.06812	37.5757
	262.841	1.06812	37.5322
	262.795	1.37329	48.1723
	262.764	1.06812	37.4244
	262.748	1.06812	37.4021
	262.702	1.2207	42.6714
	262.672	1.2207	42.6236
	262.641	1.2207	42.5743
	262.625	1.06812	37.2306
	262.594	0.915527	31.875
	262.563	1.06812	37.1445
	262.533	1.37329	47.7031
	262.532	1.2207	42.4013
	262.456	1.2207	42.2811
	262.44	1.06812	36.9742
	262.41	1.06812	36.9328
	262.379	1.37329	47.4295
	262.363	1.2207	42.1345
	262.332	1.2207	42.0857
	262.317	1.2207	42.0621
	262.286	1.06812	36.7622
	262.271	1.06812	36.7416
	262.24	1.06812	36.6991
0-1h-9
	261.13	-3.35693	-74.0715	-111.997
	260.868	-3.20435	-70.019
	260.59	-3.35693	-72.5989
	260.328	-3.66211	-78.4316
	260.066	-3.96729	-84.1444
	259.866	-3.96729	-83.5209
	259.666	-4.11987	-86.0907
	259.481	-4.42505	-91.8346
	259.296	-4.42505	-91.205
	259.173	-5.0354	-103.313
	259.096	-5.18799	-106.14
	259.019	-5.34058	-108.949
	258.988	-4.88281	-99.4949
	258.942	-5.0354	-102.429
	258.942	-5.18799	-105.533
	258.972	-5.18799	-105.651
	258.942	-5.34058	-108.638
	258.942	-5.34058	-108.638
	258.896	-6.2561	-127.047
	258.927	-5.95093	-120.988
	258.942	-6.10352	-124.16
	258.988	-5.95093	-121.263
	258.973	-6.2561	-127.411
	258.973	-6.2561	-127.411
	259.019	-6.71387	-136.969
	259.05	-6.40869	-130.893
	259.112	-6.40869	-131.195
	259.158	-6.2561	-128.29
	259.204	-6.40869	-131.645
	259.25	-6.10352	-125.59
	259.281	-6.10352	-125.735
	259.327	-6.10352	-125.95
	259.343	-6.10352	-126.025
	259.358	-6.40869	-132.401
	259.389	-6.10352	-126.241
	259.404	-5.95093	-123.153
	259.42	-6.10352	-126.386
	259.404	-5.79834	-119.995
	259.404	-5.95093	-123.153
	259.435	-6.40869	-132.781
	259.45	-6.2561	-129.691
	259.481	-6.10352	-126.673
	259.45	-5.95093	-123.364
	259.435	-6.2561	-129.619
	259.451	-6.10352	-126.532
	259.497	-5.95093	-123.58
	259.528	-6.10352	-126.895
	259.589	-5.79834	-120.823
	259.605	-5.64575	-117.713
	259.62	-5.49316	-114.595
	259.605	-5.64575	-117.713
	259.589	-5.49316	-114.463
	259.574	-5.64575	-117.577
	259.558	-6.10352	-127.037
	259.574	-5.49316	-114.399
	259.543	-5.79834	-120.617
	259.543	-5.64575	-117.442
	259.497	-5.34058	-110.903
	259.466	-5.64575	-117.106
	259.42	-5.79834	-120.066
	259.389	-5.64575	-116.771
	259.343	-5.64575	-116.572
	259.343	-5.79834	-119.723
	259.373	-5.95093	-123.011
	259.373	-5.79834	-119.857
	259.389	-5.79834	-119.928
	259.42	-5.95093	-123.226
	259.435	-5.64575	-116.971
	259.451	-5.64575	-117.041
	259.481	-5.64575	-117.172
	259.482	-5.49316	-114.009
	259.512	-5.49316	-114.136
	259.512	-5.64575	-117.307
	259.512	-5.18799	-107.794
	259.527	-5.49316	-114.199
	259.558	-5.64575	-117.508
	259.574	-5.49316	-114.399
	259.605	-5.34058	-111.35
	259.666	-5.34058	-111.602
	259.682	-5.0354	-105.287
	259.713	-5.34058	-111.798
	259.774	-5.0354	-105.648
	259.774	-4.88281	-102.446
	259.79	-5.0354	-105.711
	259.821	-4.57764	-96.2105
	259.851	-4.73022	-99.5287
	259.897	-4.88281	-102.916
	259.913	-4.73022	-99.7584
	259.913	-4.42505	-93.3218
	259.928	-4.88281	-103.034
	259.928	-4.57764	-96.5941
	259.928	-4.73022	-99.8141
	259.913	-4.73022	-99.7584
	259.898	-4.73022	-99.7028
	259.913	-4.57764	-96.5402
	259.928	-4.73022	-99.8141
	259.944	-4.88281	-103.096
	259.974	-4.88281	-103.211
	259.975	-4.88281	-103.215
	259.975	-4.73022	-99.9887
	259.99	-4.73022	-100.044
	260.005	-4.73022	-100.1
	260.021	-4.88281	-103.391
0-1h-10
	263.196	-4.88281	-116.348	-116.132
	263.149	-5.34058	-127.035
	263.088	-5.49316	-130.369
	263.103	-5.64575	-134.066
	263.134	-5.64575	-134.22
	263.196	-5.49316	-130.894
	263.257	-5.79834	-138.48
	263.334	-5.49316	-131.567
	263.381	-5.64575	-135.459
	263.473	-6.10352	-146.945
	263.581	-5.79834	-140.159
	263.72	-5.79834	-140.885
	263.843	-5.95093	-145.256
	263.935	-5.95093	-145.754
	264.013	-5.64575	-138.68
	264.12	-5.79834	-142.996
	264.243	-5.64575	-139.871
	264.305	-5.64575	-140.194
	264.397	-5.49316	-136.872
	264.444	-5.49316	-137.111
	264.521	-5.18799	-129.865
	264.598	-5.18799	-130.237
	264.675	-5.18799	-130.61
	264.768	-5.49316	-138.773
	264.876	-5.34058	-135.461
	264.968	-5.0354	-128.157
	265.045	-5.0354	-128.525
	265.107	-5.0354	-128.821
	265.153	-5.0354	-129.042
	265.199	-4.88281	-125.345
	265.26	-5.18799	-133.483
	265.322	-5.18799	-133.791
	265.384	-4.73022	-122.266
	265.43	-4.88281	-126.427
	265.477	-4.73022	-122.69
	265.523	-4.88281	-126.865
	265.584	-4.73022	-123.179
	265.63	-4.57764	-119.409
	265.646	-4.73022	-123.463
	265.677	-5.0354	-131.581
	265.708	-4.73022	-123.748
	265.723	-4.57764	-119.823
	265.784	-4.88281	-128.102
	265.784	-4.73022	-124.098
	265.815	-4.57764	-120.233
	265.815	-4.57764	-120.233
	265.831	-4.27246	-112.284
	265.816	-4.27246	-112.221
	265.831	-4.73022	-124.315
	265.846	-4.42505	-116.359
	265.862	-4.57764	-120.444
	265.862	-4.42505	-116.428
	265.846	-4.73022	-124.385
	265.846	-4.42505	-116.359
	265.877	-4.73022	-124.528
	265.862	-4.57764	-120.444
	265.877	-4.27246	-112.476
	265.862	-4.27246	-112.413
	265.877	-4.27246	-112.476
	265.862	-4.11987	-108.398
	265.862	-4.11987	-108.398
	265.877	-4.11987	-108.459
	265.846	-4.11987	-108.334
	265.846	-4.27246	-112.346
	265.815	-4.11987	-108.209
	265.8	-4.11987	-108.148
	265.769	-4.11987	-108.024
	265.738	-4.11987	-107.899
	265.723	-4.27246	-111.834
	265.708	-4.11987	-107.779
	265.692	-3.96729	-103.725
	265.676	-4.27246	-111.638
	265.661	-3.96729	-103.606
	265.646	-4.11987	-107.531
	265.615	-4.27246	-111.385
	265.646	-4.11987	-107.531
	265.646	-3.8147	-99.565
	265.646	-3.96729	-103.548
	265.631	-3.96729	-103.49
	265.63	-3.96729	-103.486
	265.6	-3.96729	-103.371
	265.584	-3.96729	-103.31
	265.554	-3.96729	-103.194
	265.569	-3.96729	-103.252
	265.584	-3.96729	-103.31
	265.584	-3.96729	-103.31
	265.584	-3.50952	-91.3881
	265.569	-3.50952	-91.3372
	265.584	-3.66211	-95.3619
	265.6	-3.20435	-83.4905
	265.584	-3.66211	-95.3619
	265.584	-3.50952	-91.3881
	265.569	-3.50952	-91.3372
	265.584	-3.50952	-91.3881
	265.538	-3.96729	-103.133
	265.584	-3.50952	-91.3881
	265.522	-3.50952	-91.1777
	265.522	-3.35693	-87.2131
	265.492	-3.50952	-91.076
	265.492	-3.35693	-87.1158
	265.492	-3.35693	-87.1158
	265.476	-3.50952	-91.0218
	265.445	-3.66211	-94.8703
	265.446	-3.35693	-86.9669
0-1h-11
	261.361	-5.79834	-129.053	-114.601
	261.053	-6.10352	-134.299
	260.822	-6.2561	-136.48
	260.652	-6.40869	-138.928
	260.482	-6.86646	-147.915
	260.359	-7.47681	-160.33
	260.267	-7.01904	-149.998
	260.175	-7.01904	-149.486
	260.098	-6.86646	-145.818
	260.036	-7.17163	-151.949
	260.005	-7.17163	-151.774
	260.005	-7.17163	-151.774
	260.021	-7.32422	-155.096
	260.052	-7.32422	-155.275
	260.113	-7.32422	-155.627
	260.113	-7.32422	-155.627
	260.19	-7.32422	-156.074
	260.221	-7.17163	-152.998
	260.283	-7.01904	-150.087
	260.36	-7.01904	-150.518
	260.421	-7.01904	-150.86
	260.437	-7.17163	-154.232
	260.514	-7.01904	-151.382
	260.576	-6.71387	-145.134
	260.653	-6.56128	-142.241
	260.699	-6.71387	-145.799
	260.745	-6.56128	-142.729
	260.776	-6.56128	-142.894
	260.822	-6.86646	-149.797
	260.868	-6.71387	-146.718
	260.991	-6.40869	-140.69
	261.007	-6.2561	-137.422
	261.038	-6.2561	-137.58
	261.068	-6.10352	-134.374
	261.023	-6.10352	-134.149
	261.053	-5.79834	-127.583
	261.084	-6.10352	-134.454
	261.084	-5.95093	-131.092
	261.13	-5.79834	-127.949
	261.13	-5.79834	-127.949
	261.146	-5.64575	-124.656
	261.146	-5.49316	-121.286
	261.146	-5.34058	-117.917
	261.177	-5.34058	-118.053
	261.176	-5.34058	-118.048
	261.161	-5.0354	-111.24
	261.177	-5.34058	-118.053
	261.192	-5.0354	-111.368
	261.192	-5.0354	-111.368
	261.192	-5.0354	-111.368
	261.161	-5.34058	-117.983
	261.161	-5.34058	-117.983
	261.161	-4.73022	-104.497
	261.161	-4.73022	-104.497
	261.13	-4.73022	-104.377
	261.115	-4.57764	-100.953
	261.099	-4.73022	-104.257
	261.084	-4.73022	-104.198
	261.069	-4.73022	-104.14
	261.022	-4.88281	-107.312
	261.022	-4.57764	-100.605
	261.007	-4.42505	-97.1966
	260.992	-4.42505	-97.1424
	261.006	-4.57764	-100.545
	260.93	-4.42505	-96.9187
	260.899	-4.42505	-96.8071
	260.868	-4.57764	-100.03
	260.868	-4.57764	-100.03
	260.868	-4.27246	-93.3608
	260.853	-4.42505	-96.6416
	260.838	-3.96729	-86.595
	260.807	-4.11987	-89.8222
	260.807	-4.11987	-89.8222
	260.807	-4.27246	-93.1493
	260.791	-3.96729	-86.4438
	260.776	-4.11987	-89.7187
	260.745	-3.8147	-82.9767
	260.73	-3.96729	-86.248
	260.699	-3.96729	-86.1486
	260.668	-4.11987	-89.3591
	260.668	-4.11987	-89.3591
	260.714	-4.11987	-89.5121
	260.714	-4.11987	-89.5121
	260.745	-3.96729	-86.2961
	260.745	-3.96729	-86.2961
	260.73	-3.8147	-82.9304
	260.714	-3.96729	-86.1967
	260.699	-3.66211	-79.5211
	260.714	-3.96729	-86.1967
	260.73	-3.96729	-86.248
	260.73	-4.27246	-92.8829
	260.715	-3.96729	-86.1999
	260.761	-3.8147	-83.0261
	260.791	-3.8147	-83.1187
	260.791	-3.8147	-83.1187
	260.807	-3.35693	-73.1871
	260.822	-3.66211	-79.8857
	260.807	-3.66211	-79.8411
	260.822	-3.8147	-83.2146
	260.823	-3.50952	-76.5597
	260.884	-3.66211	-80.0701
	260.899	-3.8147	-83.4532
	260.884	-3.66211	-80.0701
0.5-1h-1
	Origin(1)mV	Origin-X(1)uV	#VALUE!
	274.229	-2.44141	-77.9737	-105.109
	273.952	-2.28882	-72.3607
	273.69	-2.28882	-71.6683
	273.397	-2.59399	-80.3558
	273.197	-2.74658	-84.4608
	273.012	-2.59399	-79.2285
	272.843	-3.05176	-92.635
	272.735	-3.20435	-96.8824
	272.688	-3.20435	-96.7154
	272.566	-3.35693	-100.868
	272.566	-3.50952	-105.454
	272.566	-3.50952	-105.454
	272.612	-3.66211	-110.225
	272.627	-3.8147	-114.882
	272.674	-3.96729	-119.683
	272.751	-3.96729	-120.022
	272.797	-3.8147	-115.6
	272.874	-3.96729	-120.565
	272.966	-3.96729	-120.973
	273.012	-4.11987	-125.838
	273.059	-3.96729	-121.386
	273.136	-3.8147	-117.047
	273.213	-3.96729	-122.074
	273.275	-3.96729	-122.352
	273.336	-4.11987	-127.343
	273.444	-3.8147	-118.378
	273.521	-4.11987	-128.211
	273.598	-4.11987	-128.573
	273.691	-3.96729	-124.234
	273.768	-4.11987	-129.378
	273.86	-4.11987	-129.816
	273.937	-4.11987	-130.183
	274.014	-3.96729	-125.716
	274.015	-4.11987	-130.556
	274.153	-4.11987	-131.219
	274.245	-3.96729	-126.786
	274.307	-3.96729	-127.075
	274.369	-3.96729	-127.364
	274.431	-3.96729	-127.654
	274.492	-3.8147	-123.019
	274.554	-3.96729	-128.232
	274.6	-3.66211	-118.567
	274.615	-3.8147	-123.576
	274.662	-3.66211	-118.837
	274.692	-3.96729	-128.883
	274.708	-3.50952	-114.077
	274.708	-3.66211	-119.038
	274.723	-3.66211	-119.103
	274.723	-3.66211	-119.103
	274.723	-3.50952	-114.14
	274.723	-3.66211	-119.103
	274.708	-3.50952	-114.077
	274.708	-3.66211	-119.038
	274.708	-3.66211	-119.038
	274.692	-3.50952	-114.01
	274.677	-3.66211	-118.902
	274.662	-3.50952	-113.885
	274.661	-3.66211	-118.833
	274.646	-3.50952	-113.818
	274.631	-3.50952	-113.755
	274.615	-3.50952	-113.689
	274.569	-3.66211	-118.432
	274.538	-3.8147	-123.227
	274.523	-3.35693	-108.379
	274.492	-3.20435	-103.335
	274.43	-3.20435	-103.1
	274.384	-3.20435	-102.926
	274.322	-3.20435	-102.692
	274.245	-3.05176	-97.5256
	274.168	-3.05176	-97.2504
	274.091	-3.05176	-96.976
	274.029	-3.50952	-111.27
	273.906	-3.20435	-101.136
	273.798	-3.20435	-100.736
	273.721	-3.8147	-119.587
	273.644	-3.50952	-109.709
	273.552	-2.89917	-90.3225
	273.444	-2.89917	-89.9653
	273.382	-3.20435	-99.2101
	273.274	-3.05176	-94.1117
	273.182	-3.05176	-93.7945
	273.058	-3.05176	-93.3687
	272.966	-3.05176	-93.054
	272.812	-2.89917	-87.9028
	272.673	-2.74658	-82.8523
	272.519	-3.05176	-91.5401
	272.365	-3.05176	-91.0242
	272.195	-2.89917	-85.9349
	272.056	-2.74658	-80.9974
	271.872	-2.44141	-71.5129
	271.702	-2.74658	-79.952
	271.533	-2.59399	-75.0431
	271.394	-2.74658	-79.0535
	271.225	-2.44141	-69.835
	271.07	-2.74658	-78.1191
	270.932	-2.74658	-77.7245
	270.777	-2.89917	-81.5776
	270.639	-2.74658	-76.8933
	270.5	-2.74658	-76.5021
	270.346	-3.20435	-88.7506
	270.192	-3.05176	-84.0477
	270.038	-2.89917	-79.395
	269.899	-2.89917	-78.9911
	269.76	-2.74658	-74.4526
	269.622	-3.05176	-82.3079
0.5-1h-2
	Origin(1)mV	Origin-X(1)uV
	271.086	-4.11987	-117.251	-100.295
	270.931	-3.8147	-107.95
	270.715	-4.11987	-115.666
	270.531	-3.66211	-102.121
	270.346	-3.8147	-105.657
	270.176	-4.27246	-117.601
	270.007	-3.96729	-108.525
	269.899	-4.11987	-112.254
	269.761	-3.8147	-103.413
	269.668	-3.96729	-107.183
	269.56	-3.96729	-106.759
	269.483	-4.11987	-110.553
	269.375	-3.96729	-106.037
	269.298	-3.8147	-101.671
	269.236	-3.96729	-105.498
	269.159	-4.27246	-113.293
	269.098	-3.66211	-96.8897
	269.036	-3.96729	-104.726
	269.005	-3.8147	-100.583
	268.928	-3.8147	-100.3
	268.882	-3.96729	-104.136
	268.805	-3.8147	-99.8479
	268.774	-3.8147	-99.7343
	268.744	-3.66211	-95.6392
	268.713	-3.8147	-99.5113
	268.666	-3.50952	-91.3919
	268.605	-2.74658	-71.3629
	268.373	-2.89917	-74.6893
	268.188	-3.66211	-93.7077
	268.065	-3.96729	-101.06
	267.988	-3.8147	-96.8988
	267.957	-3.8147	-96.7886
	267.911	-3.96729	-100.491
	267.911	-3.96729	-100.491
	267.911	-4.11987	-104.356
	267.927	-4.27246	-108.285
	267.942	-4.27246	-108.345
	268.019	-4.27246	-108.651
	268.081	-4.27246	-108.899
	268.127	-4.27246	-109.083
	268.22	-4.27246	-109.456
	268.281	-4.11987	-105.783
	268.374	-4.27246	-110.076
	268.451	-4.11987	-106.445
	268.528	-4.42505	-114.654
	268.605	-4.27246	-111.013
	268.682	-4.27246	-111.327
	268.79	-4.42505	-115.761
	268.867	-4.11987	-108.082
	268.929	-4.11987	-108.328
	268.99	-4.11987	-108.571
	269.037	-4.11987	-108.758
	269.098	-3.96729	-104.965
	269.16	-4.11987	-109.25
	269.191	-3.8147	-101.272
	269.206	-3.96729	-105.382
	269.237	-3.8147	-101.443
	269.253	-3.35693	-89.3215
	269.252	-3.96729	-105.56
	269.267	-4.11987	-109.68
	269.268	-3.8147	-101.559
	269.252	-3.66211	-97.4388
	269.252	-3.8147	-101.499
	269.221	-3.96729	-105.44
	269.206	-3.66211	-97.2745
	269.19	-3.96729	-105.32
	269.145	-3.20435	-84.9241
	269.129	-3.66211	-97
	269.082	-3.8147	-100.868
	269.052	-3.8147	-100.757
	269.005	-3.66211	-96.5596
	268.975	-3.66211	-96.4534
	268.913	-3.50952	-92.2241
	268.882	-3.8147	-100.13
	268.82	-3.8147	-99.9028
	268.759	-3.8147	-99.6795
	268.728	-3.66211	-95.5831
	268.651	-3.8147	-99.2852
	268.589	-3.8147	-99.0596
	268.559	-3.50952	-91.0338
	268.512	-3.50952	-90.8769
	268.405	-3.50952	-90.5208
	268.343	-3.50952	-90.3151
	268.266	-3.8147	-97.8923
	268.189	-3.66211	-93.7111
	268.142	-3.66211	-93.5496
	268.096	-4.27246	-108.959
	268.035	-3.66211	-93.183
	268.004	-3.8147	-96.9557
	267.973	-3.66211	-92.9712
	267.911	-4.11987	-104.356
	267.911	-3.8147	-96.6254
	267.85	-3.66211	-92.5526
	267.834	-3.96729	-100.207
	267.788	-3.96729	-100.038
	267.742	-3.96729	-99.8695
	267.695	-3.96729	-99.6974
	267.649	-3.66211	-91.8724
	267.603	-3.66211	-91.7174
	267.541	-3.66211	-91.509
	267.495	-3.66211	-91.3547
	267.449	-3.66211	-91.2006
	267.372	-3.50952	-87.1536
	267.31	-3.8147	-94.5177
	267.249	-3.66211	-90.5337
	267.218	-3.8147	-94.1991
	267.156	-3.50952	-86.4655
	267.14	-3.66211	-90.1723
	267.048	-3.50952	-86.1235
	267.002	-3.66211	-89.7168
	266.956	-3.66211	-89.5655
0.5-1h-3
	Origin(1)mV	Origin-X(1)uV
	264.473	-2.13623	-47.6947	-72.7564
	263.779	-1.98364	-43.1741
	263.132	-1.83105	-38.9178
	262.454	-1.67847	-34.798
	261.838	-1.83105	-37.113
	261.329	-2.28882	-45.5334
	260.898	-2.28882	-44.8189
	260.559	-2.89917	-56.0694
	260.251	-3.05176	-58.3574
	260.02	-3.20435	-60.7583
	259.882	-3.50952	-66.209
	259.851	-3.35693	-63.2581
	259.774	-3.96729	-74.5498
	259.805	-4.42505	-83.2472
	259.852	-4.11987	-77.6391
	259.959	-3.96729	-75.0576
	260.052	-4.42505	-84.0051
	260.175	-4.57764	-87.2953
	260.345	-4.57764	-87.8416
	260.499	-4.42505	-85.3945
	260.668	-4.27246	-82.9624
	260.792	-4.57764	-89.2944
	260.946	-4.42505	-86.8068
	261.084	-4.73022	-93.2651
	261.254	-4.57764	-90.8212
	261.377	-4.27246	-85.1492
	261.501	-4.11987	-82.4823
	261.624	-4.11987	-82.8555
	261.747	-3.96729	-80.1476
	261.839	-3.96729	-80.4186
	261.916	-3.8147	-77.5441
	261.947	-4.11987	-83.8434
	261.963	-3.8147	-77.6779
	261.993	-3.35693	-68.431
	261.962	-3.8147	-77.6751
	261.947	-3.8147	-77.6323
	261.963	-3.66211	-74.5705
	261.993	-3.8147	-77.7635
	262.009	-3.66211	-74.6965
	262.024	-3.8147	-77.852
	262.04	-3.8147	-77.8977
	262.024	-3.50952	-71.6233
	261.963	-3.8147	-77.6779
	261.978	-3.8147	-77.7207
	262.008	-3.8147	-77.8063
	261.962	-3.8147	-77.6751
	261.947	-3.96729	-80.738
	261.963	-4.11987	-83.8926
	262.024	-3.8147	-77.852
	262.07	-3.96729	-81.1032
	262.086	-3.8147	-78.0293
	262.132	-3.66211	-75.0344
	262.163	-3.50952	-71.9895
	262.178	-3.50952	-72.0292
	262.194	-3.66211	-75.2053
	262.194	-3.35693	-68.9376
	262.194	-3.35693	-68.9376
	262.178	-3.35693	-68.8972
	262.194	-3.35693	-68.9376
	262.178	-3.20435	-65.7654
	262.148	-2.89917	-59.4361
	262.132	-3.05176	-62.5278
	262.086	-3.05176	-62.4224
	262.055	-3.05176	-62.3514
	261.993	-3.05176	-62.2097
	261.978	-3.35693	-68.3934
	261.947	-2.74658	-55.8938
	261.87	-2.89917	-58.8328
	261.793	-2.89917	-58.6668
	261.731	-3.05176	-61.6145
	261.669	-3.05176	-61.4744
	261.623	-3.66211	-73.6459
	261.608	-3.35693	-67.471
	261.562	-3.50952	-70.4192
	261.531	-3.50952	-70.3392
	261.516	-3.66211	-73.3573
	261.484	-3.50952	-70.2179
	261.423	-3.35693	-67.0145
	261.361	-3.35693	-66.8622
	261.253	-3.8147	-75.6802
	261.13	-3.66211	-72.3255
	261.084	-3.66211	-72.2035
	261.084	-3.8147	-75.2123
	261.053	-3.96729	-78.1322
	261.053	-3.8147	-75.1268
	261.053	-3.96729	-78.1322
	261.038	-3.8147	-75.0855
	261.007	-3.8147	-75.0001
	261.007	-3.8147	-75.0001
	260.961	-3.66211	-71.8784
	260.946	-3.66211	-71.8388
	260.945	-3.96729	-77.8232
	260.899	-3.8147	-74.7034
	260.853	-3.66211	-71.5941
	260.822	-3.66211	-71.5127
	260.807	-3.8147	-74.4517
	260.776	-4.27246	-83.2919
	260.776	-4.11987	-80.3168
	260.76	-4.11987	-80.2697
	260.745	-3.96729	-77.2541
	260.73	-3.8147	-74.2416
	260.683	-4.27246	-83.0081
	260.653	-3.8147	-74.0321
	260.652	-4.11987	-79.9522
	260.621	-4.11987	-79.8613
	260.575	-4.27246	-82.6798
	260.576	-4.27246	-82.6828
	260.591	-4.11987	-79.7734
	260.575	-4.11987	-79.7266
	260.529	-3.96729	-76.6442
	260.483	-4.11987	-79.4579
	260.468	-4.42505	-85.2974
0.5-1h-4
	Origin(1)mV	Origin-X(1)uV
	265.86	-1.98364	-46.6003	-116.874
	265.398	-2.59399	-59.9152
	264.951	-2.44141	-55.4733
	264.566	-2.89917	-64.951
	264.227	-3.20435	-70.901
	263.935	-2.89917	-63.4643
	263.703	-3.66211	-79.4873
	263.534	-3.8147	-82.2877
	263.411	-4.27246	-91.748
	263.38	-4.57764	-98.1905
	263.334	-4.27246	-91.4891
	263.35	-4.42505	-94.8126
	263.396	-5.18799	-111.349
	263.504	-5.34058	-115.08
	263.658	-5.64575	-122.346
	263.828	-5.49316	-119.784
	264.028	-5.64575	-124.019
	264.244	-5.79834	-128.385
	264.475	-5.64575	-126.07
	264.706	-5.79834	-130.58
	264.969	-5.64575	-128.376
	265.246	-5.64575	-129.688
	265.492	-5.79834	-134.401
	265.723	-5.64575	-131.978
	265.986	-5.34058	-126.054
	266.202	-5.18799	-123.426
	266.448	-5.34058	-128.209
	266.679	-5.34058	-129.3
	266.879	-5.0354	-122.809
	267.033	-5.0354	-123.505
	267.188	-4.88281	-120.445
	267.342	-4.73022	-117.342
	267.496	-5.0354	-125.621
	267.65	-4.88281	-122.504
	268.574	-5.64575	-146.533
	268.528	-5.49316	-142.332
	268.497	-5.49316	-142.17
	268.466	-5.34058	-138.064
	268.42	-5.34058	-137.831
	268.374	-5.79834	-149.394
	268.327	-5.49316	-141.286
	268.266	-5.18799	-133.138
	268.25	-5.49316	-140.887
	268.204	-5.18799	-132.835
	268.158	-5.18799	-132.611
	268.112	-5.18799	-132.387
	268.065	-5.18799	-132.159
	268.019	-5.0354	-128.055
	267.942	-4.88281	-123.824
	267.896	-5.0354	-127.479
	267.803	-4.88281	-123.194
	267.726	-5.18799	-130.525
	267.68	-5.0354	-126.472
	267.603	-5.18799	-129.938
	267.541	-5.0354	-125.829
	267.511	-4.88281	-121.881
	267.464	-5.0354	-125.474
	267.418	-5.0354	-125.262
	267.372	-4.88281	-121.261
	267.31	-5.0354	-124.767
	267.202	-4.88281	-120.507
	267.141	-5.0354	-123.995
	267.079	-5.18799	-127.463
	267.033	-5.0354	-123.505
	266.986	-5.34058	-130.765
	266.94	-5.18799	-126.814
	266.909	-5.0354	-122.944
	266.863	-5.0354	-122.737
	266.802	-5.34058	-129.885
	266.756	-4.73022	-114.845
	266.709	-4.57764	-110.949
	266.647	-4.88281	-118.077
	266.586	-5.18799	-125.178
	266.54	-4.88281	-117.615
	266.524	-5.18799	-124.893
	266.493	-4.73022	-113.742
	266.432	-4.73022	-113.488
	266.401	-4.73022	-113.359
	266.355	-5.0354	-120.47
	266.324	-4.73022	-113.039
	266.278	-4.88281	-116.489
	266.262	-4.57764	-109.144
	266.231	-4.57764	-109.02
	266.2	-4.73022	-112.526
	266.154	-4.57764	-108.712
	266.124	-4.57764	-108.593
	266.078	-4.42505	-104.795
	266.046	-4.57764	-108.282
	266	-4.88281	-115.307
	265.954	-4.42505	-104.32
	265.892	-4.57764	-107.672
	265.877	-4.42505	-104.025
	265.815	-4.42505	-103.789
	265.754	-4.27246	-99.9855
	265.723	-4.27246	-99.8718
0.5-1h-5
	272.719	1.06812	32.2721	14.7323
	272.303	1.37329	40.8636
	271.902	1.06812	31.3189
	271.501	1.2207	35.2698
	271.1	1.37329	39.0989
	270.715	1.37329	38.5504
	270.361	1.06812	29.597
	270.006	1.06812	29.2139
	269.667	1.2207	32.9742
	269.297	1.37329	36.5957
	268.943	1.37329	36.1234
	268.604	1.2207	31.7127
	268.265	1.06812	27.4059
	267.957	1.06812	27.0979
	267.695	1.2207	30.6724
	267.433	1.06812	26.5818
	267.217	1.2207	30.139
	267.001	1.06812	26.1637
	266.801	1.2207	29.6824
	266.616	1.2207	29.4816
	266.4	1.06812	25.593
	266.2	1.37329	32.6643
	266	1.06812	25.2201
	265.815	1.67847	39.3628
	265.522	1.67847	38.9418
	265.275	1.37329	31.5741
	265.013	1.52588	34.7466
	264.751	1.67847	37.8555
	264.443	1.37329	30.6247
	264.135	1.83105	40.3735
	263.811	1.67847	36.5719
	263.472	1.52588	32.8362
	263.179	1.52588	32.4851
	262.856	1.37329	28.8921
	262.532	1.52588	31.7229
	262.224	1.52588	31.3664
	261.915	1.37329	27.9115
	261.592	1.2207	24.5179
	261.268	1.52588	30.285
	260.945	1.67847	32.9209
	260.621	1.06812	20.7024
	260.297	1.2207	23.38
	259.973	1.06812	20.2159
	259.65	1.06812	19.9777
	259.326	1.2207	22.5616
	258.987	1.06812	19.4976
	258.663	0.915527	16.5146
	258.355	0.915527	16.329
	257.986	1.06812	18.7943
	257.631	0.457764	7.95055
	257.292	0.915527	15.7043
	256.984	0.610352	10.352
	256.645	0.915527	15.3359
	256.29	0.915527	15.1374
	255.936	0.762939	12.4517
	255.612	0.610352	9.84368
	255.288	0.610352	9.72733
	254.965	0.457764	7.20956
	254.61	0.305176	4.74418
	254.302	0.305176	4.69087
	253.994	0.457764	6.95719
	253.701	0.305176	4.58854
	253.377	0.152588	2.26716
	253.039	0.152588	2.23922
	252.746	0.305176	4.43052
	252.468	-0.152588	-2.1928
	252.237	0.152588	2.17428
	251.929	-0.152588	-2.14985
	251.621	-0.305176	-4.2514
	251.451	-0.610352	-8.44998
	251.266	-0.152588	-2.09818
	251.02	-0.152588	-2.07932
	250.773	-0.152588	-2.06056
	250.527	-0.152588	-2.04204
	250.311	-0.457764	-6.07781
	249.864	-0.762939	-9.96494
	249.664	-0.305176	-3.95679
	249.448	-0.457764	-5.88835
	249.248	-0.457764	-5.84529
	249.047	-0.305176	-3.86821
	248.862	-0.305176	-3.84204
	248.677	-0.457764	-5.72409
	248.492	-0.610352	-7.5805
	248.323	-0.457764	-5.65021
	248.199	-0.762939	-9.37431
	248.03	-0.457764	-5.58978
	247.907	-0.305176	-3.70973
	247.799	-0.457764	-5.5426
	247.707	-0.610352	-7.36525
	247.614	-0.152588	-1.83502
	247.522	-0.305176	-3.65768
	247.414	-0.305176	-3.64322
	247.399	-0.305176	-3.64121
	247.306	-0.305176	-3.6288
	247.245	-0.305176	-3.62069
	247.198	-0.305176	-3.61445
	247.152	-0.152588	-1.80417
	247.09	-0.305176	-3.60016
	246.936	0.152588	1.78991
0.5-1h-6
	270.701	-3.50952	-98.4781	-105.067
	270.886	-4.11987	-116.394
	271.025	-3.96729	-112.656
	271.179	-4.11987	-117.652
	271.379	-4.27246	-122.909
	271.564	-4.42505	-128.166
	271.78	-4.57764	-133.641
	272.011	-4.73022	-139.272
	272.227	-4.57764	-135.851
	272.458	-4.57764	-137.008
	272.689	-3.8147	-115.143
	272.859	-4.42505	-134.404
	273.028	-3.66211	-111.921
	273.183	-3.50952	-107.869
	273.321	-3.50952	-108.416
	273.46	-3.66211	-113.709
	273.568	-3.50952	-109.403
	273.706	-3.35693	-105.178
	273.753	-3.35693	-105.359
	273.86	-3.96729	-125.007
	273.937	-3.50952	-110.895
	274.06	-3.50952	-111.397
	274.107	-3.35693	-106.737
	274.184	-3.35693	-107.039
	274.215	-3.35693	-107.161
	274.261	-3.35693	-107.342
	274.277	-3.50952	-112.287
	274.353	-3.50952	-112.601
	274.4	-3.05176	-98.0819
	274.415	-3.20435	-103.043
	274.461	-3.35693	-108.132
	274.446	-3.35693	-108.073
	274.523	-3.50952	-113.306
	274.554	-3.05176	-98.6377
	274.569	-3.20435	-103.627
	274.585	-3.05176	-98.75
	274.6	-3.05176	-98.8044
	274.63	-3.20435	-103.859
	274.6	-3.05176	-98.8044
	274.615	-3.50952	-113.689
	274.631	-3.35693	-108.809
	274.677	-3.20435	-104.039
	274.723	-3.05176	-99.2514
	274.769	-2.89917	-94.4477
	274.769	-2.89917	-94.4477
	274.785	-3.05176	-99.4774
	274.769	-3.35693	-109.362
	274.754	-2.74658	-89.4272
	274.692	-2.74658	-89.2239
	274.63	-3.20435	-103.859
	274.6	-2.44141	-79.0425
	274.523	-2.89917	-93.5989
	274.477	-2.74658	-88.5227
	274.431	-2.89917	-93.2835
	274.415	-3.05176	-98.1359
	274.399	-3.50952	-112.791
	274.338	-2.89917	-92.9657
	274.307	-3.05176	-97.7477
	274.307	-3.20435	-102.636
	274.307	-3.50952	-112.411
	274.307	-3.35693	-107.523
	274.323	-2.89917	-92.9145
	274.323	-3.20435	-102.696
	274.322	-3.35693	-107.582
	274.322	-3.20435	-102.692
	274.307	-2.89917	-92.86
	274.261	-3.05176	-97.5829
	274.214	-3.05176	-97.4147
	274.153	-3.20435	-102.057
	274.122	-3.05176	-97.0864
	274.122	-3.05176	-97.0864
	274.076	-3.35693	-106.615
	274.03	-3.20435	-101.598
	273.999	-3.20435	-101.482
	273.999	-3.35693	-106.315
	273.983	-3.20435	-101.422
	273.968	-3.50952	-111.021
	273.937	-3.20435	-101.251
	273.86	-3.05176	-96.1574
	273.798	-3.05176	-95.9389
	273.737	-3.20435	-100.511
	273.737	-3.35693	-105.297
	273.752	-3.35693	-105.355
	273.752	-3.05176	-95.7771
	273.721	-3.20435	-100.452
	273.706	-3.35693	-105.178
	273.675	-3.20435	-100.283
	273.614	-3.20435	-100.058
	273.598	-3.20435	-99.9996
	273.614	-3.50952	-109.588
	273.614	-3.20435	-100.058
	273.598	-3.05176	-95.2374
	273.567	-3.05176	-95.1291
	273.521	-2.89917	-90.2198
	273.459	-3.05176	-94.7528
0.5-1h-7
	Origin(1)mV	Origin-X(1)uV
	268.066	-1.52588	-38.8686	-47.6206
	268.127	-1.2207	-31.1642
	268.22	-1.67847	-42.9979
	268.297	-1.37329	-35.2793
	268.359	-1.52588	-39.2887
	268.436	-1.52588	-39.3999
	268.513	-1.52588	-39.5114
	268.574	-1.37329	-35.6398
	268.636	-1.52588	-39.6901
	268.698	-1.67847	-43.7588
	268.759	-1.52588	-39.8697
	268.821	-1.67847	-43.9568
	268.882	-1.52588	-40.0501
	268.929	-1.67847	-44.1313
	268.96	-1.67847	-44.1815
	269.006	-1.67847	-44.2562
	269.036	-1.52588	-40.277
	269.052	-1.52588	-40.3007
	269.082	-1.83105	-48.4143
	269.067	-1.52588	-40.3229
	269.067	-1.83105	-48.3876
	269.082	-1.83105	-48.4143
	269.098	-1.98364	-52.4798
	269.067	-1.83105	-48.3876
	269.052	-1.67847	-44.331
	269.036	-1.83105	-48.3326
	269.021	-1.83105	-48.306
	269.021	-2.13623	-56.3575
	269.005	-1.83105	-48.2777
	268.975	-1.83105	-48.2245
	268.944	-2.13623	-56.1985
	268.928	-2.13623	-56.1655
	268.913	-1.83105	-48.115
	268.898	-1.67847	-44.0811
	268.867	-1.98364	-52.0369
	268.836	-2.13623	-55.9762
	268.805	-1.98364	-51.9186
	268.759	-1.98364	-51.831
	268.728	-1.98364	-51.7721
	268.697	-1.98364	-51.7132
	268.666	-1.98364	-51.6545
	268.62	-1.83105	-47.6004
	268.574	-2.13623	-55.4406
	268.543	-2.13623	-55.3776
	268.497	-1.98364	-51.3351
	268.466	-1.98364	-51.2767
	268.404	-2.13623	-55.0959
	268.358	-1.98364	-51.0739
	268.297	-2.13623	-54.8799
	268.251	-1.52588	-39.1333
	268.219	-2.28882	-58.6321
	268.173	-1.83105	-46.826
	268.127	-1.98364	-50.6428
	268.065	-1.98364	-50.5277
	268.019	-1.98364	-50.4425
	267.958	-1.67847	-42.5865
	267.927	-1.98364	-50.2725
	267.88	-2.28882	-57.9073
	267.834	-1.98364	-50.1012
	267.773	-2.13623	-53.8347
	267.726	-2.13623	-53.742
	267.68	-1.98364	-49.8189
	267.634	-1.98364	-49.7348
	267.572	-2.13623	-53.4391
	267.526	-1.98364	-49.5381
	267.464	-2.28882	-57.03
	267.403	-2.13623	-53.1087
	267.356	-2.13623	-53.0172
	267.295	-2.28882	-56.6774
	267.249	-2.13623	-52.8095
	267.187	-2.13623	-52.6894
	267.156	-2.13623	-52.6295
	267.079	-1.98364	-48.7322
	267.048	-2.28882	-56.166
	266.987	-2.13623	-52.3042
	266.925	-2.13623	-52.1853
	266.894	-2.13623	-52.126
	266.848	-2.13623	-52.038
	266.802	-2.13623	-51.9503
	266.755	-1.98364	-48.1562
	266.74	-1.98364	-48.1297
	266.694	-1.98364	-48.0485
	266.632	-1.98364	-47.9393
	266.586	-1.98364	-47.8585
	266.555	-1.83105	-44.1266
	266.493	-1.83105	-44.0263
	266.463	-1.98364	-47.6429
	266.432	-1.98364	-47.5888
	266.385	-1.98364	-47.5068
	266.324	-1.98364	-47.4005
	266.278	-1.98364	-47.3206
	266.262	-1.83105	-43.6547
	266.247	-1.52588	-36.3588
	266.201	-1.83105	-43.5571
	266.17	-1.98364	-47.1334
	266.124	-1.83105	-43.4342
	266.093	-1.98364	-47.0004
	266.062	-1.67847	-39.7242
	266.031	-1.67847	-39.6791
	266	-1.83105	-43.237
	265.954	-1.83105	-43.1641
	265.938	-1.83105	-43.1387
	265.892	-1.83105	-43.066
	265.862	-1.83105	-43.0186
	265.862	-1.83105	-43.0186
	265.831	-1.52588	-35.8079
0.5-1h-8
	Origin(1)mV	Origin-X(1)uV
	256.263	-5.64575	-93.2687	-54.4698
	256.955	-2.89917	-49.1235
	257.077	-1.67847	-28.5668
	255.476	-4.73022	-75.9179
	256.015	-3.20435	-52.4539
	256.292	-2.28882	-37.849
	256.368	-1.67847	-27.8331
	256.368	-1.67847	-27.8331
	256.368	-1.67847	-27.8331
	256.291	-1.67847	-27.7546
	256.245	-1.52588	-25.1888
	256.23	-1.52588	-25.1749
	256.23	-1.98364	-32.7277
	256.245	-1.98364	-32.7457
	256.306	-2.13623	-35.3438
	256.307	-2.44141	-40.3947
	256.369	-2.28882	-37.9561
	256.461	-2.74658	-45.7018
	256.553	-2.59399	-43.3086
	256.676	-2.89917	-48.6231
	256.754	-2.74658	-46.1958
	256.877	-2.89917	-48.9831
	257.016	-2.89917	-49.2336
	257.155	-2.89917	-49.4853
	257.309	-3.20435	-55.0047
	257.432	-3.05176	-52.6222
	257.602	-3.05176	-52.9515
	257.756	-3.05176	-53.2516
	257.925	-3.05176	-53.5829
	258.079	-2.74658	-48.4975
	258.233	-3.05176	-54.192
	258.372	-3.20435	-57.1928
	258.526	-3.20435	-57.5169
	258.665	-3.20435	-57.811
	258.819	-3.05176	-55.3699
	258.942	-3.05176	-55.6204
	259.096	-3.05176	-55.9356
	259.204	-3.05176	-56.1578
	259.327	-2.89917	-53.591
	259.404	-3.20435	-59.4002
	259.497	-2.89917	-53.9264
	259.605	-3.05176	-56.9902
	259.713	-2.89917	-54.3555
	259.805	-3.50952	-66.0222
	259.944	-3.35693	-63.4743
	260.067	-3.50952	-66.66
	260.222	-3.50952	-67.0402
	260.391	-3.8147	-73.3237
	260.576	-3.8147	-73.8232
	260.792	-3.8147	-74.4107
	260.977	-3.8147	-74.9176
	261.162	-3.96729	-78.4453
	261.377	-3.66211	-72.9841
	261.578	-3.8147	-76.5882
	261.763	-3.66211	-74.0252
	261.917	-3.35693	-68.2404
	262.056	-3.66211	-74.8254
	262.209	-3.50952	-72.1112
	262.333	-3.35693	-69.2902
	262.441	-3.35693	-69.5653
	262.549	-3.20435	-66.6669
	262.61	-3.05176	-63.6343
	262.672	-3.05176	-63.7792
	262.718	-3.05176	-63.887
	262.764	-2.89917	-60.7949
	262.779	-2.89917	-60.8284
	262.81	-2.89917	-60.8976
	262.826	-3.05176	-64.1407
	262.841	-2.74658	-57.7579
	262.872	-3.35693	-70.6743
	262.872	-2.59399	-54.611
	262.872	-2.89917	-61.0364
	262.872	-2.74658	-57.8237
	262.872	-2.89917	-61.0364
	262.887	-2.74658	-57.8555
	262.903	-3.05176	-64.3222
	262.918	-2.74658	-57.9214
	262.933	-2.74658	-57.9532
	262.918	-2.74658	-57.9214
	262.918	-2.89917	-61.1395
	262.887	-2.74658	-57.8555
	262.887	-2.74658	-57.8555
	262.872	-2.44141	-51.3986
	262.841	-2.44141	-51.3401
	262.81	-2.59399	-54.4869
	262.748	-2.59399	-54.3631
	262.718	-2.59399	-54.3033
	262.656	-2.74658	-57.3671
	262.594	-2.59399	-54.0567
	262.533	-2.59399	-53.9358
	262.44	-2.59399	-53.7521
	262.394	-2.74658	-56.8182
	262.348	-2.74658	-56.7224
	262.301	-2.74658	-56.6247
	262.255	-2.59399	-53.3884
	262.193	-2.59399	-53.2671
	262.116	-2.44141	-49.9922
	262.039	-2.28882	-46.7353
	261.916	-2.44141	-49.6267
	261.824	-1.98364	-40.1852
	261.716	-2.13623	-43.1054
	261.639	-2.28882	-46.0543
	261.531	-2.44141	-48.9305
	261.423	-2.28882	-45.6907
	261.376	-2.59399	-51.6938
	261.284	-2.44141	-48.489
	261.223	-3.05176	-60.4765
	261.177	-2.28882	-45.2801
	261.146	-2.74658	-54.2748
	261.1	-2.44141	-48.1627
	261.084	-2.44141	-48.1344
	261.053	-2.59399	-51.0847
	261.038	-2.89917	-57.0637
	260.991	-2.59399	-50.9686
	260.961	-2.59399	-50.9125
	260.899	-2.74658	-53.7851
	260.884	-2.28882	-44.7958
	260.838	-2.28882	-44.7203
	260.807	-2.74658	-53.6038
	260.807	-2.59399	-50.6256
	260.791	-2.89917	-56.5488
	260.791	-2.89917	-56.5488
	260.807	-2.89917	-56.582
	260.822	-3.20435	-62.573
	260.837	-3.20435	-62.6075
	260.869	-2.74658	-53.7259
	260.899	-2.74658	-53.7851
	260.899	-2.89917	-56.7734
	260.899	-2.74658	-53.7851
	260.884	-2.74658	-53.7555
	260.884	-2.89917	-56.7421
	260.868	-2.74658	-53.7239
	260.837	-2.74658	-53.6629
	260.822	-2.89917	-56.6132
	260.776	-2.74658	-53.5429
	260.73	-2.89917	-56.4224
	260.714	-2.74658	-53.4212
	260.668	-2.74658	-53.3311
	260.652	-2.59399	-50.3385
	260.606	-2.59399	-50.2536
	260.576	-2.13623	-41.3394
	260.529	-2.44141	-47.164
	260.498	-2.74658	-52.9994
	260.468	-2.74658	-52.9411
	260.421	-2.89917	-55.7862
	260.437	-2.44141	-47.005
	260.391	-2.89917	-55.7248
	260.345	-2.89917	-55.6308
	260.329	-2.89917	-55.5982
	260.283	-2.74658	-52.5829
	260.251	-2.74658	-52.5212
	260.22	-2.89917	-55.3763
	260.128	-2.59399	-49.3798
	260.067	-2.89917	-55.0662
	260.036	-2.74658	-52.1085
	259.974	-2.89917	-54.8786
	259.944	-2.74658	-51.9328
	259.913	-3.05176	-57.638
0.5-1h-9
	251.081	-5.18799	-78.7836	-76.5595
	250.68	-5.34058	-79.9007
	250.249	-5.18799	-76.3834
	249.848	-5.34058	-77.4665
	249.478	-5.49316	-78.5911
	249.124	-5.34058	-75.4086
	248.847	-4.88281	-68.2377
	248.554	-5.0354	-69.6078
	248.276	-5.18799	-70.9799
	248.015	-4.57764	-62.0235
	247.783	-5.0354	-67.6405
	247.522	-5.34058	-71.0475
[truncated: 7,766 more rows]
