# Supplementary material for: Ion Flux in Roots of Chinese Fir (Cunninghamia lanceolata (Lamb.) Hook) under Aluminum Stress
Source: PLoS One. 2016 Jun 6;11(6):e0156832. doi: 10.1371/journal.pone.0156832 (PMC4894599; doi:10.1371/journal.pone.0156832)
Supplement: S2 Table — (XLSX) [file pone.0156832.s003.xlsx]

## Sheet: K+
0-1h-1
	Origin(1)mV	Origin-X(1)uV
	-84.5897	2.47411	85.179	67.8452
	-84.5226	2.06263	71.1905
	-84.434	2.34885	81.3359
	-84.3541	2.44101	84.7783
	-84.2748	2.20022	76.6414
	-84.1809	2.12299	74.2098
	-84.0389	2.17231	76.3353
	-83.9704	2.29498	80.8512
	-83.9024	2.13013	75.2337
	-83.8376	1.89842	67.212
	-83.7384	2.25279	80.0519
	-83.6346	2.47476	88.2788
	-83.5553	2.11844	75.7919
	-83.4929	2.17621	78.0394
	-83.453	2.20801	79.2971
	-83.4079	2.11195	75.9746
	-83.3048	1.84001	66.4464
	-83.2816	2.03861	73.6814
	-83.2122	1.96917	71.3555
	-83.0875	1.63232	59.4245
	-82.9668	1.60571	58.7185
	-82.7872	1.39153	51.2272
	-82.6398	1.71669	63.5439
	-82.5056	1.70761	63.5238
	-82.3938	1.31299	49.0476
	-82.3088	1.94061	72.7208
	-82.2562	1.76732	66.3569
	-82.1726	1.85883	70.0097
	-82.1581	1.62258	61.145
	-82.0921	1.65698	62.5946
	-82.0717	1.76667	66.7887
	-82.0558	1.90621	72.1063
	-82.0418	1.96008	74.1825
	-82.0491	1.95813	74.0886
	-82.0599	1.72253	65.1486
	-82.0363	1.78874	67.712
	-82.0267	1.78289	67.5146
	-82.0365	2.06652	78.2261
	-82.0345	1.70047	64.375
	-82.0335	1.97047	74.5987
	-82.0358	1.88998	71.5455
	-82.041	1.89063	71.5563
	-82.0622	1.80756	68.3586
	-82.083	1.69463	64.0385
	-82.0809	1.95943	74.0503
	-82.123	1.76667	66.6615
	-82.1287	1.816	68.5083
	-82.1312	1.83157	69.0892
	-82.1482	1.48953	56.1521
	-82.1547	1.71929	64.7975
	-82.1508	1.82898	68.9413
	-82.1439	1.99578	75.2476
	-82.1587	1.8452	69.5323
	-82.1982	1.92049	72.2631
	-82.226	2.03667	76.5554
	-82.2411	1.816	68.2228
	-82.2548	1.54924	58.1721
	-82.2616	1.78225	66.904
	-82.2815	1.74201	65.3452
	-82.2831	1.68424	63.1745
	-82.29	1.85429	69.5348
	-82.2985	1.62518	60.9244
	-82.314	1.72513	64.6339
	-82.3029	1.65114	61.8874
	-82.3153	1.66153	62.2482
	-82.3121	1.91724	71.8362
	-82.3288	1.67256	62.63
	-82.3293	1.60376	60.0527
	-82.3353	1.56612	58.6303
	-82.3056	1.69008	63.3406
	-82.3008	1.37855	51.6747
	-82.291	1.59597	59.8461
	-82.2794	1.69333	63.5242
	-82.2678	1.31624	49.3997
	-82.2383	1.62778	61.1585
	-82.1895	1.72643	64.9825
	-82.1883	1.40321	52.8194
	-82.1458	1.58624	59.803
	-82.0899	1.50316	56.7887
0-1h-2
	Origin(1)mV	Origin-X(1)uV
	-72.1465	1.65049	90.2188	54.5917
	-72.2345	1.59922	87.1311
	-72.3251	1.61285	87.5784
	-72.3804	1.48823	80.6459
	-72.4498	1.9153	103.52
	-72.506	1.74201	93.9579
	-72.5918	1.18124	63.5101
	-72.6274	1.16631	62.6246
	-72.6321	1.14425	61.4294
	-72.6645	1.1754	63.0257
	-72.6678	0.905402	48.5426
	-72.6448	1.15917	62.201
	-72.6539	1.15658	62.041
	-72.6479	1.21499	65.1887
	-72.6777	1.17151	62.7863
	-72.7008	1.23641	66.2077
	-72.7207	1.05273	56.3305
	-72.7413	1.04884	56.0794
	-72.7286	1.01249	54.1615
	-72.7303	1.18059	63.1494
	-72.7462	1.32208	70.6757
	-72.7753	1.15463	61.6577
	-72.7834	0.978742	52.2497
	-72.8163	1.21824	64.9554
	-72.8296	1.06377	56.6914
	-72.8221	1.09881	58.5751
	-72.8429	1.19033	63.4046
	-72.8599	0.995617	52.9997
	-72.8693	0.962517	51.2199
	-72.9041	1.08518	57.6725
	-72.9414	0.874248	46.3984
	-72.9614	0.940449	49.8746
	-72.9517	0.913839	48.4809
	-72.966	1.12932	59.8805
	-72.9735	1.2098	64.1298
	-72.9822	1.01833	53.9631
	-73.0004	0.679538	35.9859
	-72.9753	1.07285	56.8667
	-73.0033	0.623072	32.9921
	-72.996	0.895017	47.4043
	-73.0135	1.18708	62.832
	-73.0038	0.729514	38.6275
	-73.0186	0.916435	48.498
	-73.0456	1.08713	57.4733
	-73.0739	1.41879	74.9276
	-73.1057	0.829465	43.7538
	-73.1217	0.774946	40.8537
	-73.1048	0.758071	39.9892
	-73.1351	0.776244	40.9018
	-73.1163	0.922926	48.6645
	-73.1214	1.07934	56.901
	-73.0843	0.895666	47.2833
	-73.104	0.694466	36.6351
	-73.0874	0.780138	41.1799
	-73.0984	0.850234	44.8615
	-73.0965	0.933959	49.2825
	-73.0905	0.720427	38.0237
	-73.1035	0.951483	50.1941
	-73.1209	0.686028	36.1673
	-73.133	1.09752	57.8344
	-73.1368	0.874248	46.0628
	-73.1346	0.665259	35.0545
	-73.1867	0.9398	49.4248
	-73.1955	1.04689	55.0386
	-73.2417	0.977444	51.2995
	-73.2844	0.87944	46.0829
	-73.3004	1.05533	55.2665
	-73.3379	1.06701	55.8004
	-73.3405	0.970954	50.7722
	-73.359	0.665259	34.7635
	-73.388	0.736004	38.4188
	-73.4215	0.640596	33.3971
	-73.4395	0.771701	40.2052
	-73.4572	0.873599	45.4839
	-73.4604	0.861267	44.8366
	-73.4603	0.891772	46.4247
	-73.4929	0.845042	43.9388
0-1h-3
	-80.085	1.35908	55.316	43.507
	-79.9706	1.22018	49.8744
	-79.7755	1.10595	45.5342
	-79.6109	0.97355	40.329
	-79.3391	1.25134	52.3621
	-79.0955	0.935906	39.5192
	-78.834	1.24939	53.2708
	-78.4937	0.575044	24.8308
	-78.1968	0.247282	10.7963
	-77.8536	0.486775	21.5252
	-77.4821	0.969656	43.4734
	-77.0542	-0.161609	-7.36188
	-76.7131	0.538698	24.8521
	-76.3384	1.28184	59.9638
	-75.9245	0.906051	43.0418
	-75.5255	0.057764	2.78511
	-75.154	0.581534	28.4281
	-74.7491	0.442641	21.9664
	-74.3804	-0.38942	-19.5922
	-74.0946	0.901507	45.8385
	-73.6852	0.724321	37.3938
	-73.3544	1.20201	62.8216
	-72.9735	0.648384	34.3704
	-72.7158	0.347882	18.6186
	-72.4156	0.643841	34.8444
	-72.1924	0.525717	28.6885
	-71.9701	1.13191	62.2799
	-71.6971	0.280382	15.5848
	-71.44	0.578938	32.4883
	-71.2219	-0.429011	-24.2714
	-71.0045	1.13256	64.5917
	-70.7526	0.671101	38.6343
	-70.5412	0.939151	54.4914
	-70.3247	0.909945	53.2232
	-70.1452	1.33961	78.8779
	-69.9666	0.950185	56.3211
	-69.6985	1.32987	79.6147
	-69.5385	0.680187	40.9639
	-69.348	0.178484	10.8256
	-69.1321	0.552977	33.8095
	-68.9803	1.36037	83.6428
	-68.7589	0.25507	15.8131
	-68.4998	0.0467304	2.92509
	-68.3989	1.32533	83.2677
	-68.1846	1.17994	74.726
	-68.0221	0.48353	30.8081
	-67.8699	1.14619	73.4423
	-67.6004	0.720427	46.6265
	-67.4847	1.06636	69.3121
	-67.2918	1.41749	92.7969
	-67.1401	1.43372	94.3898
	-66.9523	0.492616	32.6596
	-66.7733	-0.151874	-10.1363
	-66.5959	0.633457	42.5567
	-66.3879	0.766509	51.8946
	-66.229	0.619178	42.1683
	-66.0522	0.81259	55.7047
	-65.8448	0.8392	57.9738
	-65.6479	0.239493	16.6664
	-65.4859	1.80496	126.361
	-65.353	0.772999	54.3852
	-65.1219	0.112932	8.01411
	-64.9561	1.21953	87.0749
	-64.6969	1.81535	130.869
	-64.5012	-0.0149278	-1.08405
	-64.4013	1.51355	110.318
	-64.1196	0.378387	27.8704
	-63.9368	-0.222619	-16.5092
	-63.6668	1.44799	108.459
	-63.4872	2.04381	154.11
	-63.2405	0.750283	57.0967
	-63.099	0.935257	71.548
	-62.8714	-0.489371	-37.7566
	-62.6688	-0.318026	-24.7221
	-62.408	0.097355	7.64158
	-62.1565	0.73211	58.0032
	-61.948	-0.0830763	-6.63324
	-61.7484	1.12218	90.2647
	-61.5903	0.291416	23.5792
0-1h-4
	-58.0341	4.42511	408.572	295.688
	-57.9397	4.28492	397.02
	-57.7957	4.47574	416.922
	-57.723	4.12396	385.196
	-57.6043	3.79295	355.847
	-57.4986	3.9299	370.145
	-57.4324	3.64043	343.727
	-57.3492	3.83774	363.477
	-57.3208	4.31478	409.084
	-57.3126	3.90004	369.88
	-57.233	3.23803	308.01
	-57.1566	3.39055	323.433
	-57.1272	3.64368	347.957
	-57.0799	3.59045	343.477
	-57.0531	3.21012	307.403
	-57.0675	3.49115	334.133
	-57.1221	3.24127	309.591
	-57.0981	3.28476	314.024
	-57.0666	2.97387	284.638
	-57.0662	3.3237	318.123
	-57.0771	3.15171	301.541
	-57.0754	3.48726	333.663
	-57.1344	3.50478	334.605
	-57.2009	3.33538	317.647
	-57.251	3.06344	291.209
	-57.2867	3.11277	295.505
	-57.344	3.0245	286.516
	-57.3961	3.0589	289.214
	-57.441	2.94467	277.95
	-57.4904	3.14976	296.762
	-57.5633	3.10173	291.447
	-57.6309	2.80902	263.283
	-57.67	3.08551	288.776
	-57.7729	2.85964	266.617
	-57.8587	2.82265	262.331
	-57.9779	3.27567	303.085
	-58.0797	2.73633	252.23
	-58.1353	2.6565	244.367
	-58.1804	2.86678	263.267
	-58.2947	2.71426	248.205
	-58.3328	3.21466	293.545
	-58.4787	3.0193	274.217
	-58.5944	2.58705	233.954
	-58.6816	2.76878	249.577
	-58.7604	2.81032	252.581
	-58.8683	2.7889	249.653
	-58.9529	2.4832	221.592
	-58.9872	2.9544	263.301
	-59.0783	2.65779	236.069
	-59.1813	2.84342	251.591
	-59.3306	2.56044	225.301
	-59.4079	2.38455	209.223
	-59.4499	2.66234	233.231
	-59.5166	2.49748	218.248
	-59.6081	2.29953	200.269
	-59.6703	2.61625	227.324
0-1h-5
	-79.727	4.0954	168.907	132.815
	-79.5301	4.37708	181.848
	-79.299	3.64627	152.795
	-79.068	3.92795	166.016
	-78.8343	3.64692	155.484
	-78.6001	3.45026	148.385
	-78.3042	3.47687	151.183
	-78.014	4.09735	180.091
	-77.6832	3.53983	157.512
	-77.4136	3.9312	176.686
	-77.0728	3.93769	179.233
	-76.7927	3.53983	162.81
	-76.4915	4.28427	199.263
	-76.1885	4.41927	207.868
	-75.8672	4.24598	202.116
	-75.6374	4.07658	195.717
	-75.4388	4.48158	216.752
	-75.2571	4.04867	197.143
	-75.1397	4.21677	206.225
	-74.9108	4.01103	197.84
	-74.7883	3.83579	190.06
	-74.6554	4.33489	215.85
	-74.4935	4.30634	215.722
	-74.3663	3.47233	174.771
	-74.1985	3.62031	183.358
	-74.0274	3.73908	190.58
	-73.7936	3.82346	196.581
	-73.6549	3.88317	200.682
	-73.5358	3.48466	180.887
	-73.3542	3.26269	170.512
	-73.237	3.9273	206.138
	-73.1487	3.49764	184.191
	-73.0114	3.15365	166.927
	-72.896	3.22764	171.577
	-72.8054	3.092	164.921
	-72.7096	2.67142	142.998
	-72.6279	2.98101	160.054
	-72.548	3.04202	163.814
	-72.4273	2.97906	161.145
	-72.355	2.46438	133.665
	-72.264	3.17053	172.545
	-72.1005	2.57407	140.941
	-72.0114	2.45724	134.99
	-71.8788	2.1827	120.501
	-71.7922	2.24501	124.34
	-71.6631	1.89453	105.434
	-71.5273	2.54162	142.159
	-71.3169	1.08648	61.2488
	-71.1289	0.75872	43.0719
	-70.9132	1.3409	76.733
	-70.8245	1.70371	97.8157
	-70.6133	1.83482	106.173
	-70.4261	1.52523	88.8747
	-70.2659	1.63102	95.6061
	-70.0102	2.04186	120.83
	-69.7872	1.79263	106.964
	-69.4634	0.290767	17.5604
	-69.2483	1.61674	98.4203
	-68.9819	1.7459	107.34
	-68.6887	1.09167	67.8533
	-68.4486	2.08729	130.895
	-68.1732	1.78939	113.369
	-68.0085	1.75758	112.037
	-67.6847	1.4415	93.0012
	-67.5705	2.04186	132.293
	-67.3296	0.619827	40.5213
	-67.1947	0.765211	50.2769
	-66.8978	1.24225	82.5242
	-66.6959	1.29158	86.4471
	-66.5037	1.16956	78.8414
	-66.28	0.683432	46.456
	-66.0365	1.28184	87.9229
	-65.815	1.06312	73.5236
	-65.6667	0.782734	54.4321
	-64.361	1.0047	73.34
	-64.2074	1.57261	115.451
	-64.0473	1.33961	98.9328
	-63.8748	0.514684	38.2556
	-63.643	1.26756	95.0286
	-63.4888	1.12348	84.7112
	-63.26	0.805451	61.2505
	-62.9927	0.337498	25.9215
	-62.7516	1.06701	82.6873
	-62.546	1.16112	90.6699
0-1h-6
	-76.3822	4.05192	189.225	120.533
	-68.3276	2.62534	165.376
	-67.1153	2.20931	145.582
	-66.7985	2.49813	166.562
	-66.4911	2.32289	156.657
	-66.2454	2.58315	175.806
	-65.9555	2.1457	147.616
	-65.6732	2.10027	146.014
	-65.3662	1.98669	139.703
	-65.029	1.92828	137.305
	-64.631	1.43112	103.424
	-64.3264	1.18903	86.9067
	-63.9814	1.5447	114.358
	-63.6155	1.3448	100.922
	-63.2431	1.48499	112.995
	-62.8527	0.853479	65.8922
	-62.3955	1.18189	92.8092
	-61.9813	1.12542	89.7454
	-61.5922	0.578289	46.7872
	-61.1537	0.636702	52.3591
	-60.2495	1.11893	95.1572
0-1h-7
	-81.3664	1.52458	59.1671	38.8456
	-81.1553	1.3461	52.652
	-81.0209	1.9166	75.341
	-80.8497	1.49407	59.1068
	-80.7157	0.747037	29.7016
	-80.6414	1.96917	78.5064
	-80.5298	1.38244	55.3446
	-80.3798	1.12867	45.438
	-80.2869	1.49602	60.4344
	-80.1434	1.59922	64.9485
	-80.0693	1.47006	59.8678
	-79.9624	1.8134	74.1434
	-79.8617	1.3078	53.6724
	-79.8154	1.29807	53.3648
	-79.722	0.88658	36.5752
	-79.6521	1.30196	53.8504
	-79.5803	1.20396	49.9301
	-79.5156	1.53107	63.6482
	-79.4299	1.6453	68.6147
	-79.405	1.33701	55.81
	-79.3848	1.19876	50.0769
	-79.3569	1.92763	80.6066
	-79.285	1.01444	42.5347
	-79.2115	1.33506	56.1307
	-79.1751	1.15788	48.7475
	-79.1166	1.40516	59.2865
	-79.0897	1.47006	62.0866
	-79.0133	0.468602	19.8478
	-78.9798	1.53107	64.9278
	-78.9431	1.68684	71.6308
	-78.9336	1.09103	46.3471
	-78.9156	1.88285	80.0356
	-78.8493	0.851532	36.2869
	-78.7893	0.858671	36.6728
	-78.7499	1.25588	53.7151
	-78.6587	0.737302	31.6425
	-78.6477	1.1384	48.8757
	-78.5671	0.940449	40.4982
	-78.4808	1.06441	45.9834
	-78.4305	0.912541	39.4964
	-78.3592	1.17929	51.1768
	-78.3086	1.12088	48.7336
	-78.2509	0.938502	40.892
	-78.1837	1.27146	55.5374
	-78.0614	1.62713	71.3961
	-78.0345	0.741845	32.5844
	-77.9415	1.1066	48.7734
	-77.8461	0.392665	17.3685
	-77.7538	0.679538	30.1606
	-77.7198	1.23122	54.7147
	-77.6685	0.978742	43.578
	-77.5224	1.1741	52.5604
	-77.4062	0.298555	13.4234
	-77.3187	1.09881	49.5637
	-77.2119	1.77446	80.3568
	-77.0679	0.991074	45.1227
	-76.9201	0.436799	19.9968
	-76.787	0.0610091	2.8069
	-76.6706	0.84634	39.1062
	-76.5245	0.654875	30.4241
	-76.3691	-0.697062	-32.5727
	-76.2702	1.65504	77.6175
	-76.153	-0.188869	-8.8966
	-75.9884	0.735355	34.8502
	-75.8178	-0.268051	-12.7847
	-75.6797	1.06571	51.0887
	-75.5781	1.64984	79.3889
	-75.3048	0.170696	8.29789
	-75.08	-1.276	-62.5517
	-74.9959	0.627615	30.8615
	-74.7324	-0.826869	-41.0608
	-74.6325	0.0181729	0.905769
	-74.4647	-0.13435	-6.73814
	-74.1732	-0.242089	-12.2739
	-74.0699	0.00649029	0.33032
	-73.9149	1.39737	71.5265
	-73.5824	-0.779489	-40.3975
	-73.5634	-0.635404	-32.9534
	-73.2891	0.388771	20.3684
	-73.0617	-0.211585	-11.1796
0-1h-8
	-76.971	2.07561	94.8387	117.143
	-76.7168	3.22634	148.812
	-76.7044	2.10546	97.1601
	-76.6101	2.90962	134.738
	-76.4612	3.27827	152.65
	-76.4331	2.3826	111.062
	-76.3531	2.61496	122.255
	-76.3352	3.19649	149.54
	-76.3123	3.00502	140.703
	-76.321	2.31835	108.518
	-76.2546	2.30602	108.208
	-76.1482	2.62145	123.495
	-76.1128	2.72334	128.464
	-76.0293	3.02839	143.296
	-76.0054	2.51176	118.958
	-75.9632	2.61106	123.854
	-75.9232	2.82849	134.367
	-75.8231	2.88301	137.467
	-75.7442	2.59029	123.873
	-75.6911	2.67272	128.067
	-75.6343	2.1801	104.684
	-75.5999	2.33392	112.213
	-75.5699	2.99918	144.357
	-75.5303	2.61171	125.893
	-75.4919	2.50462	120.904
	-75.4066	2.60847	126.316
	-75.2738	2.47217	120.309
	-75.2361	2.9226	142.426
	-75.2238	2.81096	137.049
	-75.2755	2.59484	126.27
	-75.1098	3.1225	152.883
	-75.1246	2.30666	112.878
	-75.0619	2.31445	113.524
	-74.9599	2.7545	135.62
	-74.9741	2.65649	130.725
	-74.9744	2.92584	143.977
	-74.9939	2.89079	142.15
	-74.9844	3.04526	149.798
	-75.0394	2.9226	143.471
	-75.0549	2.54875	125.048
	-75.0448	2.94661	144.621
	-74.9756	3.01541	148.378
	-75.0341	2.42868	119.249
	-75.056	2.73957	134.404
	-75.0446	2.6539	130.256
	-75.0916	2.26642	111.045
	-75.0872	2.91805	142.994
	-75.0577	2.5176	123.507
	-75.0264	2.38714	117.243
	-75.1156	2.0451	100.113
	-75.0411	2.25734	110.808
	-75.0597	2.03667	99.9075
	-75.0391	2.28005	111.931
	-75.05	2.08534	102.332
	-75.0641	2.17686	106.767
	-75.0353	2.48969	122.239
	-75.0433	2.03147	99.7132
	-75.0382	2.1814	107.092
	-74.9666	1.96592	96.7712
	-74.9295	1.85039	91.2102
	-74.8746	1.97047	97.3273
	-74.9786	1.68749	83.0293
	-74.787	2.01525	99.8634
	-74.7434	1.86143	92.391
	-74.6474	1.48564	74.003
	-74.5269	1.37076	68.5872
	-74.3537	1.74265	87.757
	-74.323	1.82508	92.0127
	-74.285	1.59662	80.609
	-74.1231	1.92503	97.7749
	-74.0554	1.96722	100.169
	-73.9105	2.03732	104.299
	-73.8563	1.41944	72.8144
	-73.6983	2.03147	104.822
	-73.6328	2.29239	118.573
	-73.5357	2.05289	106.569
	-73.4484	1.76667	92.0096
	-73.3678	2.09508	109.44
	-73.2734	2.1152	110.879
0-1h-9				132.068
	-81.6128	2.7506	164.939
	-81.6774	2.50462	149.823
	-81.7328	2.66818	159.273
	-81.7998	2.26707	134.988
	-81.847	2.45205	145.741
	-81.8674	2.53967	150.832
	-81.9425	2.70193	160.013
	-82.0073	2.53447	149.729
	-82.0835	2.51306	148.037
	-82.1323	2.69544	158.487
	-82.1934	2.22748	130.671
	-82.2226	2.26772	132.885
	-82.238	2.3495	137.596
	-82.2806	2.53188	148.038
	-82.2576	2.04121	119.454
	-82.2982	2.50332	146.27
	-82.3272	2.62209	153.042
	-82.3648	2.10222	122.526
	-82.3804	2.32224	135.269
	-82.4144	2.3495	136.681
	-82.4664	2.42803	140.972
	-82.5336	2.24825	130.203
	-82.6003	2.42479	140.073
	-82.6352	2.417	139.438
	-82.6932	2.4845	143.018
	-82.7423	2.417	138.875
	-82.7632	2.27486	130.605
	-82.8093	2.2171	127.067
	-82.8299	2.2807	130.61
	-82.8247	2.25215	129.001
	-82.8724	2.57212	147.061
	-82.9258	2.57277	146.802
	-82.973	2.07171	118.002
	-83.0174	2.2158	125.997
	-83.0469	2.03407	115.535
	-83.1097	2.09313	118.607
	-83.1525	2.23592	126.493
	-83.1918	2.17037	122.603
	-83.2269	2.35339	132.764
	-83.2994	2.33068	131.123
	-83.3544	2.36053	132.526
	-83.4171	2.30147	128.905
	-83.4928	2.30017	128.464
	-83.5269	2.17556	121.348
	-83.5655	1.8822	104.833
	-83.6171	2.05679	114.333
	-83.6066	1.94191	107.99
	-83.6134	1.58429	88.0809
	-83.5551	1.92503	107.26
	-83.5648	1.79003	99.7019
	-83.5673	1.48823	82.885
0-1h-10				119.752
	-83.1664	3.29125	186.093
	-83.2132	3.20233	180.746
	-83.242	3.0193	170.231
	-83.2398	3.2231	181.735
	-83.2985	3.07382	172.934
	-83.3331	3.15106	177.048
	-83.3589	3.02449	169.771
	-83.3818	2.95505	165.73
	-83.3648	2.56368	143.874
	-83.3738	2.63378	147.758
	-83.3513	2.85834	160.491
	-83.3775	2.26772	127.205
	-83.3483	2.29044	128.621
	-83.2941	2.2794	128.264
	-83.2454	1.91465	107.939
	-83.1955	2.09313	118.223
	-83.1257	2.06652	117.029
	-83.0266	1.91205	108.688
	-82.9407	2.02044	115.223
	-82.8143	1.78549	102.312
	-82.6997	2.16972	124.868
	-82.5722	1.98474	114.776
	-82.4422	1.79263	104.178
	-82.3025	1.86662	109.052
	-82.1593	1.48758	87.3804
	-81.9879	1.69268	100.074
	-81.8621	1.85169	109.997
	-81.77	1.76797	105.39
	-81.6309	1.52718	91.5173
	-81.4548	1.45513	87.7826
	-81.2629	1.36946	83.2164
	-81.1103	1.46162	89.3305
	-80.9876	1.46682	90.0653
	-80.8323	1.54016	95.1255
	-80.7068	1.5129	93.8865
	-80.6027	1.66347	103.637
	-80.4798	1.28119	80.1933
	-80.0292	1.74979	111.405
	-79.9461	1.70761	109.062
	-79.8426	1.51744	97.2971
	-79.7646	1.71734	110.439
	-79.7123	1.82313	117.474
	-79.6424	1.85688	119.966
	-79.7685	1.57715	101.409
	-79.7042	1.81275	116.841
	-79.6936	1.85429	119.567
	-79.6643	1.72578	111.404
	-79.6239	1.80366	116.609
	-79.5846	1.67451	108.421
	-79.5379	1.93607	125.577
	-79.5501	1.72318	111.718
	-79.5428	1.6797	108.929
	-79.5167	1.71215	111.143
	-79.4919	1.36881	88.9394
0-1h-11
	Origin(1)mV	Origin-X(1)uV
	-87.6343	3.40223	162.458	140.9
	-87.4255	3.30682	159.154
	-87.2242	3.34057	162.007
	-87.0767	3.02385	147.469
	-86.9507	2.89664	141.941
	-86.833	3.13613	154.361
	-86.7567	3.37367	166.531
	-86.7056	3.16663	156.615
	-86.6208	3.2549	161.497
	-86.636	3.06863	152.168
	-86.5952	3.03877	150.92
	-86.5722	2.77721	138.051
	-86.5724	3.06993	152.599
	-86.5419	2.8181	140.244
	-86.5313	2.68375	133.612
	-86.5503	3.00243	149.369
	-86.5656	3.03877	151.089
	-86.5616	2.7889	138.688
	-86.5752	2.94791	146.519
	-86.5797	2.83173	140.721
	-86.6185	3.03423	150.562
	-86.6448	3.19844	158.552
	-86.6503	3.10692	153.984
	-86.7009	3.19779	158.184
	-86.7659	3.27243	161.478
	-86.808	3.33992	164.546
	-86.8419	3.04526	149.838
	-86.8506	2.9187	143.564
	-86.8821	3.08485	151.555
	-86.9185	2.67531	131.256
	-86.9246	2.94142	144.277
	-86.9356	2.70063	132.412
	-86.9565	3.17896	155.74
	-86.9963	2.89469	141.601
	-87.0074	3.1225	152.68
	-87.056	2.99139	146.001
	-87.0677	2.78565	135.9
	-87.0613	3.14911	153.667
	-87.129	3.07252	149.546
	-87.1483	2.96349	144.135
	-87.1773	2.83498	137.734
	-87.1939	3.21791	156.238
	-87.2477	2.98166	144.474
	-87.3213	3.14781	152.1
	-87.3322	2.82978	136.678
	-87.3776	3.16274	152.497
	-87.402	3.19454	153.888
	-87.4207	2.97257	143.095
	-87.4188	2.93363	141.23
	-87.4205	2.96673	142.815
	-87.4573	2.96803	142.678
	-87.4061	2.83563	136.578
	-87.4165	2.76553	133.15
	-87.3979	2.73697	131.868
	-87.3839	2.59483	125.086
	-87.3597	2.4819	119.752
	-87.3072	2.60457	125.92
	-87.2526	2.86743	138.914
	-87.2255	2.67272	129.615
	-87.1733	2.46113	119.59
	-87.1377	2.46113	119.751
	-87.0669	2.5864	126.184
	-87.0293	2.47282	120.814
	-86.9572	2.36832	116.025
	-86.8667	2.23722	109.979
	-86.8434	2.70971	133.321
	-86.8017	2.53447	124.897
	-86.8458	2.81616	138.546
	-86.8524	2.8525	140.299
	-86.897	2.90053	142.42
	-86.9038	2.77721	136.33
	-86.91	2.73178	134.069
	-86.9263	2.55395	125.265
	-86.9006	2.62145	128.7
	-86.8697	2.81161	138.197
	-86.8833	2.53188	124.385
	-86.871	2.54551	125.112
	-86.8676	2.4183	118.876
	-86.8395	2.49164	122.611
	-86.817	2.40142	118.272
	-86.7939	2.42284	119.431
0.5-1h-1
	-63.2719	2.06003	140.375	77.9687
	-63.2177	1.75693	119.986
	-63.163	1.86922	127.938
	-63.1669	1.39802	95.673
	-63.1027	1.73552	119.079
	-63.0832	1.63037	111.953
	-63.0592	1.40775	96.7612
	-63.0525	1.53107	105.266
	-63.0451	1.25393	86.2382
	-63.0298	1.39672	96.1178
	-63.0529	1.11569	76.7068
	-63.0525	1.31949	90.7196
	-63.0365	1.20526	82.92
	-63.0489	0.959921	66.0083
	-63.0599	1.02612	70.5288
	-63.0733	1.2085	83.0187
	-63.0651	1.2786	87.8634
	-63.0686	1.36492	93.7816
	-63.0667	1.21239	83.3083
	-63.061	1.62648	111.787
	-63.098	1.14619	78.6595
	-63.14	1.15139	78.8817
	-63.1816	1.09362	74.7975
	-63.1799	1.45643	99.6175
	-63.2298	1.29352	88.296
	-63.2865	1.27081	86.5463
	-63.3266	1.22602	83.3602
	-63.331	0.936556	63.668
	-63.3934	0.981339	66.5434
	-63.4136	1.26691	85.8365
	-63.4467	1.3448	90.9911
	-63.4813	1.25004	84.4609
	-63.5272	1.12348	75.7686
	-63.5531	1.32338	89.1557
	-63.6238	1.15788	77.7827
	-63.6098	1.141	76.6924
	-63.6611	1.05403	70.6994
	-63.6682	1.1092	74.3784
	-63.7055	1.18838	79.5671
	-63.7315	1.03845	69.4555
	-63.7488	0.902806	60.341
	-63.7556	1.17929	78.798
	-63.7903	0.91319	60.9322
	-63.775	1.05533	70.4599
	-63.7906	1.04365	69.636
	-63.7648	1.42528	95.1983
	-63.8205	1.06961	71.2814
	-63.8396	1.0722	71.3986
	-63.8785	0.996267	66.2376
	-63.8747	0.815186	54.2069
	-63.8928	0.935257	62.1453
	-63.9048	1.04494	69.3994
	-63.9179	1.19487	79.3144
	-63.9109	0.954079	63.3494
	-63.9519	0.976147	64.7067
	-63.957	1.23057	81.5544
	-63.9749	1.1053	73.1993
	-63.9954	1.18384	78.3353
	-63.9817	0.714586	47.3115
	-64.0314	1.13776	75.1762
	-64.0419	0.922277	60.9128
	-64.0113	1.16502	77.0402
	-64.0083	1.16761	77.2209
	-64.063	0.891123	58.8049
	-64.0508	1.0748	70.9604
	-64.0834	0.874897	57.6863
	-64.1026	1.0443	68.8019
	-64.131	0.83271	54.7988
	-64.1366	0.944344	62.1308
	-64.0728	1.08583	71.6246
	-64.1076	1.21045	79.7318
	-64.1115	1.0761	70.8713
	-64.1427	0.811292	53.364
	-64.1158	0.545837	35.9428
	-64.1132	1.10985	73.089
	-64.0936	1.06896	70.4523
	-64.0948	0.580236	38.2405
	-64.0421	1.25458	82.8587
	-64.0405	0.920979	60.8306
0.5-1h-2
	Origin(1)mV	Origin-X(1)uV
	-57.4323	3.94093	340.406	318.25
	-57.3522	3.99026	345.79
	-57.2412	3.53723	307.92
	-57.1574	3.58202	312.882
	-57.0589	3.86889	339.291
	-56.9707	3.65471	321.661
	-56.9333	3.85915	340.168
	-56.8392	3.91497	346.409
	-56.8094	3.6943	327.282
	-56.7831	3.91432	347.142
	-56.7188	3.44572	306.387
	-56.6939	3.53723	314.842
	-56.6286	3.7962	338.787
	-56.5984	3.57228	319.197
	-56.5657	3.44767	308.473
	-56.5204	3.53464	316.836
	-56.4991	3.43923	308.551
	-56.4795	3.61642	324.705
	-56.4701	3.40743	306.059
	-56.4329	3.23803	291.285
	-56.408	3.16534	285.034
	-56.3833	3.53204	318.371
	-56.3677	3.46389	312.427
	-56.374	3.75336	338.446
	-56.3472	3.5275	318.428
	-56.3285	3.67807	332.271
	-56.3189	3.51452	317.622
	-56.3292	3.54892	320.596
	-56.3305	3.4944	315.655
	-56.3517	3.70533	334.418
	-56.3408	3.25296	293.724
	-56.3221	3.5249	318.518
	-56.3643	3.45026	311.24
	-56.4015	3.67807	331.287
	-56.4405	3.40937	306.602
	-56.423	3.08291	277.443
	-56.3115	2.97322	268.787
	-56.1657	3.18611	289.742
	-56.0828	3.21142	293.028
	-56.058	3.27048	298.718
	-56.0046	3.42495	313.504
	-56.0108	3.60408	329.816
	-56.0364	3.67807	336.237
	-56.0897	3.49634	318.934
	-56.1314	3.81178	347.117
	-56.1915	3.71053	337.074
	-56.2453	3.81827	346.103
	-56.2796	3.37173	305.205
	-56.3136	3.86759	349.602
	-56.3626	3.69884	333.685
	-56.3857	3.42041	308.28
	-56.4247	3.57423	321.632
	-56.4235	3.38341	304.478
	-56.4427	4.00259	359.911
	-56.4972	3.63848	326.451
	-56.5339	3.34252	299.452
	-56.5418	3.58526	321.094
	-56.5249	3.36199	301.307
	-56.561	3.74557	335.188
	-56.5983	3.48921	311.776
	-56.6067	3.74557	334.566
	-56.6145	3.6586	326.695
	-56.6566	3.44637	307.22
	-56.635	3.36524	300.252
	-56.6547	3.5275	314.476
	-56.622	3.2932	293.98
	-56.6492	3.36005	299.616
	-56.6374	3.27762	292.407
	-56.6437	3.72805	332.502
	-56.6737	3.80723	339.149
	-56.7213	3.69884	328.859
	-56.7133	4.08956	363.711
	-56.7522	3.73843	331.961
	-56.7745	3.45026	306.098
	-56.7966	3.33993	296.045
	-56.8131	3.62875	321.427
	-56.8664	3.67353	324.689
	-56.9184	3.36199	296.529
	-56.8727	3.57682	316.062
	-56.9048	3.38796	298.985
	-56.9026	3.39639	299.755
0.5-1h-3
	Origin(1)mV	Origin-X(1)uV
	-60.3904	3.37238	258.323	190.121
	-60.2673	3.01995	232.489
	-60.1315	2.83433	219.407
	-60.018	2.74411	213.405
	-59.9763	2.74022	213.464
	-59.8733	2.56498	200.652
	-59.8109	2.59743	203.705
	-59.7023	2.51955	198.472
	-59.5977	1.85494	146.743
	-59.4238	2.07042	164.95
	-59.2935	2.15804	172.842
	-59.1907	2.11325	169.964
	-59.097	2.2476	181.458
	-59.0476	2.07042	167.49
	-58.9576	1.70631	138.541
	-58.8109	1.74395	142.444
	-58.6735	1.4467	118.827
	-58.5342	1.76342	145.662
	-58.3874	1.63492	135.855
	-58.25	1.59597	133.361
	-58.0457	1.65244	139.23
	-57.9768	1.32922	112.311
	-57.8179	1.46292	124.408
	-57.7141	1.62194	138.514
	-57.6067	1.83547	157.433
	-57.5179	1.40321	120.794
	-57.4136	1.23187	106.495
	-57.2641	1.70306	148.124
	-57.1485	1.99383	174.228
	-57.0638	1.49148	130.782
	-56.942	1.7433	153.62
	-56.8382	1.63297	144.506
	-56.751	1.87052	166.114
	-56.6495	1.76407	157.308
	-56.565	1.77705	159.01
	-56.4991	1.60246	143.773
	-56.4024	1.6122	145.216
	-56.3324	1.94386	175.586
	-56.2953	1.72903	156.418
	-56.187	1.68554	153.156
	-56.1054	1.90946	174.077
	-56.0569	2.00227	182.897
	-55.9853	1.74136	159.529
	-55.9434	1.65309	151.701
	-55.8553	1.73487	159.776
	-55.7317	1.83871	170.191
	-55.6115	1.88285	175.129
	-55.5584	1.9484	181.617
	-55.4673	1.93412	180.954
	-55.3979	1.83092	171.783
	-55.3193	2.05679	193.591
	-55.2547	2.05938	194.344
	-55.172	2.21191	209.439
	-55.0565	2.18919	208.263
	-54.932	2.33587	223.343
	-54.8338	2.44426	234.64
	-54.7549	2.45854	236.768
	-54.6626	2.23073	215.637
	-54.6185	2.28655	221.429
	-54.5411	2.57277	249.929
	-54.475	2.2171	215.959
	-54.4239	2.42414	236.615
	-54.3803	2.44816	239.383
	-54.2736	2.48255	243.8
	-54.2188	2.56109	252.072
	-54.1506	2.65585	262.123
	-54.0855	2.63053	260.312
	-54.0405	2.65974	263.684
	-53.9876	2.49878	248.261
	-53.9572	2.65974	264.578
	-53.8705	2.36054	235.645
	-53.8181	2.60263	260.364
	-53.7564	2.70647	271.43
	-53.7261	2.552	256.255
	-53.3015	2.80188	286.238
	-53.2951	2.86094	292.347
0.5-1h-4
	Origin(1)mV	Origin-X(1)uV
	-55.4531	3.93185	368.051	310.274
	-55.2384	4.01103	378.75
	-55.2197	4.13629	390.874
	-55.2041	3.74557	354.18
	-55.141	4.0954	388.249
	-55.1559	3.91043	370.491
	-55.1424	3.91043	370.695
	-55.1299	3.76375	356.973
	-55.1092	3.94807	374.767
	-55.0913	3.70663	352.107
	-55.112	3.51841	333.948
	-55.1038	3.55995	338.003
	-55.0798	3.49245	331.919
	-55.0741	3.28476	312.254
	-55.0673	3.27567	311.476
	-55.0587	3.46649	329.734
	-55.0401	3.28151	312.376
	-55.0341	3.28995	313.256
	-54.9976	3.40353	324.55
	-54.9965	3.41911	326.05
	-54.9825	3.21986	307.226
	-54.9927	3.50868	334.643
	-54.9989	3.26983	311.786
	-55.0047	3.39185	323.343
	-55.0345	3.25685	310.1
	-55.0425	3.36264	320.067
	-55.0601	3.0894	293.852
	-55.0655	3.33344	316.992
	-55.0368	3.36913	320.759
	-55.0569	3.26594	310.682
	-55.0434	3.38147	321.848
	-55.0844	3.33344	316.749
	-55.0704	2.69154	255.905
	-55.0387	3.21596	306.154
	-55.0643	3.17572	302.01
	-55.0646	2.95765	281.27
	-55.0845	3.31397	314.898
	-55.097	2.95635	280.776
	-55.1215	3.0232	286.839
	-55.1222	2.99399	284.06
	-55.1714	3.14067	297.38
	-55.1923	3.14781	297.803
	-55.2221	3.49959	330.68
	-55.2931	3.31981	312.791
	-55.3626	3.16339	297.214
	-55.4273	3.11471	291.873
	-55.457	3.31397	310.169
	-55.5191	3.18221	297.088
	-55.5646	2.89209	269.506
	-55.6188	3.34058	310.611
	-55.6549	3.2945	305.878
	-55.7013	3.2588	301.995
	-55.7719	3.227	298.192
	-55.8204	3.37562	311.31
	-55.855	3.13678	288.879
	-55.9368	3.27308	300.43
	-55.9763	3.19779	293.05
	-56.0389	3.11147	284.416
	-56.0902	3.10952	283.646
	-56.1416	3.32889	303.021
	-56.1743	3.23414	294.007
	-56.2406	3.04202	275.799
	-56.2734	2.84471	257.569
	-56.2936	2.96673	268.396
	-56.3148	2.91676	263.648
	-56.3381	2.99659	270.607
	-56.3397	2.96284	267.542
	-56.3607	2.97842	268.72
	-56.4044	3.07253	276.718
	-56.4184	3.08226	277.437
	-56.4868	3.16858	284.414
0.5-1h-5
	Origin(1)mV	Origin-X(1)uV
	-56.4393	4.34593	390.834	328.695
	-56.2272	4.24468	385.032
	-56.0466	3.98637	364.266
	-55.8329	4.00713	369.355
	-55.6423	4.16809	387.175
	-55.4893	4.06685	380.127
	-55.3727	3.97858	373.643
	-55.2551	3.8942	367.47
	-55.1638	3.89875	369.266
	-55.0432	3.67029	349.337
	-54.9612	4.02271	384.154
	-54.8848	4.02531	385.597
	-54.84	3.78906	363.629
	-54.8169	3.89615	374.256
	-54.8173	4.02271	386.406
	-54.8051	3.67094	352.795
	-54.8131	3.88901	373.628
	-54.8132	3.89939	374.624
	-54.8658	3.88252	372.207
	-54.9137	3.73584	357.451
	-54.9513	3.64757	348.473
	-54.9909	3.72351	355.156
	-55.0523	3.89031	370.14
	-55.0976	3.76245	357.318
	-55.1721	3.82086	361.768
	-55.2135	3.64497	344.536
	-55.2697	3.56644	336.345
	-55.3163	3.10887	292.642
	-55.2722	3.43079	323.521
	-55.3316	3.56255	335.135
	-55.3954	3.71637	348.699
	-55.4083	3.51711	329.832
	-55.4322	3.38666	317.291
	-55.442	3.45935	323.972
	-55.4663	3.36524	314.848
	-55.5141	3.32825	310.784
	-55.5377	3.17507	296.198
	-55.5509	3.11861	290.775
	-55.522	3.04786	284.513
	-55.4639	3.09589	289.679
	-55.4102	3.01931	283.131
	-55.3245	3.23089	304.026
	-55.3302	3.41197	320.989
	-55.3031	3.20623	301.968
	-55.2458	3.19	301.139
	-55.1807	3.25361	307.957
	-55.1316	2.96933	281.613
	-55.0797	3.28995	312.676
	-55.0618	3.30034	313.892
	-55.0487	3.64303	346.666
	-55.0376	3.49959	333.168
	-55.0235	3.70793	353.202
	-55.0372	3.93639	374.753
	-55.0058	3.46844	330.629
	-55.013	3.62291	345.251
	-55.017	3.74622	356.943
	-55.0324	3.81113	362.9
	-55.0777	3.60798	342.926
	-55.092	3.76245	357.399
	-55.137	3.68911	349.793
	-55.1498	3.36589	318.983
	-55.1492	3.43858	325.879
	-55.1184	3.50478	332.568
	-55.1192	3.26918	310.204
	-55.0491	3.43274	326.651
	-55.0439	3.1569	300.469
	-55.0011	3.35031	319.43
	-54.9842	3.24777	309.867
	-54.9312	2.99659	286.521
	-54.8697	2.89404	277.408
	-54.8086	2.79214	268.306
	-54.7792	2.95051	283.862
	-54.7597	2.63313	253.531
	-54.7231	3.05305	294.397
	-54.7359	3.02904	291.93
	-54.728	2.84017	273.816
	-54.7339	2.59224	249.856
	-54.7176	2.61301	252.024
	-54.7303	2.77527	267.535
	-54.7271	3.0537	294.411
	-54.7285	3.09914	298.775
	-54.7497	2.51955	242.694
0.5-1h-6
	Origin(1)mV	Origin-X(1)uV
	-52.9381	4.5679	473.568	532.208
	-52.6275	4.57958	480.807
	-52.3334	4.34269	461.418
	-52.1012	4.75677	510.197
	-51.8753	4.58348	496.145
	-51.6426	4.59646	502.274
	-51.4149	4.47119	493.127
	-51.1831	4.5666	508.413
	-50.9854	4.19665	470.997
	-50.7567	4.41278	499.872
	-50.5424	4.25831	486.593
	-50.3317	4.22326	486.736
	-50.1414	4.35956	506.342
	-49.9391	4.37514	512.343
	-49.7413	4.13629	488.284
	-49.5213	4.23819	504.802
	-49.3152	3.90004	468.435
	-49.1094	4.10384	497.048
	-48.9091	4.17848	510.221
	-48.7171	4.0292	495.847
	-48.5106	4.08632	507.111
	-48.3091	4.21028	526.786
	-48.1417	4.14862	522.614
	-47.9404	4.15252	527.399
	-47.7579	4.26675	545.937
	-47.597	3.95002	508.73
	-47.4057	4.12137	534.936
	-47.2199	3.94872	516.412
	-47.0763	4.01492	528.14
	-46.9118	3.8968	516.04
	-46.7163	3.90329	521.02
	-46.585	4.01233	538.437
	-46.4325	4.27194	576.833
	-46.333	3.95911	536.762
	-46.1894	3.97858	542.556
	-46.0673	4.11488	563.931
	-45.9276	4.07204	561.236
	-45.7706	4.42836	614.245
	-45.6941	4.06036	564.959
	-45.5925	3.95456	552.515
	-45.5069	3.92601	550.437
	-45.4175	4.14213	582.846
	-45.3737	4.39785	619.927
	-45.3274	4.18108	590.483
	-45.2592	4.14927	587.617
	-45.2177	4.01687	569.829
	-45.1799	4.00519	569.045
	-45.1657	4.06555	577.953
	-45.1466	3.98182	566.49
	-45.123	3.85916	549.568
	-45.1107	3.92471	559.181
	-45.0781	3.89291	555.386
	-45.0732	3.73973	533.641
	-45.048	3.58656	512.311
	-45.03	4.00649	572.706
	-45.0687	3.98507	568.749
	-45.0903	4.03634	575.561
	-45.1315	3.8663	550.395
	-45.1516	3.64627	518.652
	-45.1932	3.74168	531.323
	-45.2257	4.03764	572.588
	-45.2669	3.88382	549.856
	-45.3009	4.05452	573.228
	-45.3378	3.73259	526.929
	-45.3714	3.94093	555.578
	-45.4186	3.70404	521.185
	-45.4393	3.54567	498.485
	-45.4155	3.48272	490.109
0.5-1h-7
	Origin(1)mV	Origin-X(1)uV
	-52.7849	4.32646	451.34	399.331
	-52.6222	3.91238	410.854
	-52.445	4.02012	425.216
	-52.3311	3.83644	407.672
	-52.1609	3.7274	398.834
	-51.979	3.98896	429.983
	-51.8296	3.41132	369.961
	-51.676	3.71442	405.35
	-51.5392	3.46519	380.262
	-51.3827	3.72286	411.14
	-51.2248	3.18676	354.205
	-51.0435	3.25945	364.961
	-50.8798	3.30683	372.736
	-50.6928	3.2601	370.271
	-50.5469	3.36329	384.26
	-50.3854	3.1595	363.354
	-50.2485	3.11666	360.427
	-50.0898	3.41392	397.353
	-49.9242	3.11991	365.586
	-49.7812	3.27762	386.302
	-49.6414	3.3224	393.809
	-49.5063	3.17378	378.264
	-49.3847	3.31072	396.538
	-49.2714	3.3912	408.049
	-49.1544	3.40288	411.405
	-49.0869	3.21726	390.034
	-48.995	3.14003	382.095
	-48.96	2.77916	338.668
	-48.8772	3.02645	370.042
	-48.8267	3.10952	380.979
	-48.8015	3.20298	392.83
	-48.771	3.19584	392.44
	-48.7397	3.43079	421.825
	-48.7344	3.36849	414.255
	-48.7437	3.48921	428.937
	-48.7587	3.2257	396.305
	-48.7059	3.28541	404.506
	-48.7103	3.4587	425.764
	-48.7242	3.34123	411.073
	-48.7651	3.67094	450.883
	-48.7885	3.27697	402.116
	-48.802	3.37108	413.436
	-48.8083	3.42236	419.617
	-48.7876	3.52296	432.314
	-48.8247	3.41651	418.621
	-48.8452	3.45286	422.723
	-48.8755	3.74493	457.912
	-48.8981	3.46324	423.083
	-48.9456	3.41392	416.255
	-48.9696	3.40288	414.505
	-48.9197	3.57163	435.941
	-49.0011	3.28476	399.606
	-49.0107	3.53399	429.756
	-49.0529	3.58981	435.795
	-49.0743	3.20168	388.344
	-49.0692	3.33019	404.013
	-49.0558	3.28411	398.641
	-49.0962	3.02904	367.079
	-49.1079	3.50738	424.839
	-49.164	3.1569	381.52
	-49.1671	3.56644	430.955
	-49.1979	3.362	405.746
	-49.2033	3.37692	407.457
	-49.2215	3.30164	398.08
	-49.2332	3.17832	383.031
	-49.2719	3.25815	392.034
	-49.3004	3.29774	396.338
	-49.312	3.37303	405.195
	-49.3317	3.39575	407.597
	-49.3616	3.21466	385.395
	-49.3585	3.27957	393.225
	-49.3742	3.13354	375.478
	-49.4193	3.13029	374.402
	-49.4507	3.12185	372.917
	-49.4835	3.21142	383.105
	-49.478	2.96089	353.299
0.5-1h-8
	Origin(1)mV	Origin-X(1)uV
	-51.0178	1.60117	179.479	199.203
	-50.8401	1.62258	183.196
	-50.6898	1.54795	175.841
	-50.5318	1.4441	165.101
	-50.3553	1.53756	177.05
	-50.1784	1.55963	180.886
	-50.0171	1.62194	189.349
	-49.8448	1.40451	165.118
	-49.6517	1.39283	165.034
	-49.497	1.43631	171.259
	-49.3592	1.55249	186.15
	-49.1627	1.3117	158.54
	-48.983	1.12413	136.865
	-48.8327	1.41489	173.319
	-48.6595	1.40646	173.502
	-48.5289	1.39607	173.137
	-48.4108	1.35259	168.551
	-48.2656	1.30326	163.365
	-48.1129	1.50122	189.349
	-47.9732	1.48888	188.861
	-47.8379	1.77251	226.076
	-47.7548	1.72448	220.694
	-47.6533	1.90102	244.291
	-47.5205	1.52198	196.642
	-47.4082	1.62258	210.598
	-47.2928	1.36232	177.65
	-47.2174	1.26951	166.056
	-47.0861	1.3805	181.538
	-47.0108	1.32987	175.416
	-46.9406	1.23965	163.983
	-46.8385	1.62258	215.528
	-46.7629	1.72059	229.248
	-46.698	1.56352	208.871
	-46.6582	1.97241	263.918
	-46.6278	1.7472	234.075
	-46.591	1.49667	200.812
	-46.5491	1.52523	204.993
	-46.5054	1.72254	231.921
	-46.471	1.2747	171.867
	-46.4216	1.45449	196.5
	-46.3796	1.48888	201.49
	-46.3361	1.73487	235.193
	-46.2943	1.60896	218.495
	-46.2859	1.65244	224.476
	-46.2732	1.7446	237.117
	-46.2872	1.78484	242.448
	-46.2807	1.47331	200.185
	-46.3093	1.70761	231.75
	-46.3184	1.67581	227.35
	-46.305	1.62518	220.602
	-46.2961	1.59403	216.452
	-46.2811	1.56547	212.703
	-46.2406	1.57196	213.937
	-46.2593	1.37336	186.767
	-46.264	1.47136	200.056
	-46.2615	1.53561	208.813
	-46.2765	1.26302	171.642
	-46.2753	1.4097	191.585
	-46.2864	1.76667	239.988
	-46.3295	1.64984	223.726
	-46.3746	1.60831	217.696
	-46.3992	1.54665	209.141
	-46.4118	1.65958	224.296
	-46.4496	1.56936	211.777
	-46.4724	1.40646	189.62
	-46.4737	1.44345	194.597
	-46.5276	1.58819	213.64
	-46.5883	1.70631	228.964
	-46.6004	1.48174	198.733
	-46.6061	1.32078	177.105
	-46.5957	1.48694	199.469
	-46.602	1.61934	217.173
	-46.6425	1.48759	199.177
	-46.6462	1.42787	191.152
	-46.6878	1.70826	228.301
	-46.6597	1.38114	184.795
	-46.6793	1.47201	196.797
	-46.663	1.51485	202.658
	-46.6933	1.21629	162.517
0.5-1h-9
	Origin(1)mV	Origin-X(1)uV
	-84.373	4.37254	236.195	272.755
	-84.0553	4.36085	238.411
	-83.7253	4.31672	238.963
	-83.003	4.26545	242.665
	-82.6867	3.98182	229.257
	-82.3306	4.47833	261.337
	-78.3712	4.22261	286.225
	-78.2177	3.75401	255.946
	-78.0373	3.6281	249.056
	-77.8564	3.86175	266.914
	-77.7037	3.88187	269.858
	-77.5885	4.01817	280.552
	-81.7429	5.0326	300.279
	-81.8309	5.20849	309.739
	-81.9343	5.10335	302.303
	-82.0348	5.08582	300.122
	-82.104	5.24938	308.963
	-82.1608	4.86905	285.966
	-82.2449	4.77429	279.51
	-82.2805	5.07155	296.512
	-82.3425	4.71523	275.036
	-82.3791	4.95083	288.377
	-82.4349	5.08388	295.502
	-82.457	4.67499	271.511
	-82.469	4.88657	283.668
	-82.4731	4.92357	285.772
	-82.5244	4.83984	280.368
	-82.571	4.7334	273.72
	-82.5608	5.1345	297.026
	-82.5999	4.79181	276.794
	-82.6185	5.19356	299.787
	-82.688	4.52766	260.668
	-82.6697	4.9359	284.365
	-82.6948	4.72496	271.955
	-82.6593	4.78727	275.912
	-82.6628	4.80934	277.147
	-82.6492	4.37384	252.183
	-82.6459	4.63215	267.108
	-82.6212	4.6646	269.23
	-82.5868	4.81323	278.169
	-82.649	4.56725	263.335
	-82.6288	4.46275	257.507
	-82.6035	4.80285	277.394
	-82.651	4.35956	251.343
	-82.6269	4.52181	260.933
	-82.6434	4.57698	263.952
	-82.6245	4.46081	257.437
	-82.5925	4.45237	257.261
0.5-1h-10
	Origin(1)mV	Origin-X(1)uV
	-75.7606	4.07398	304.81	264.24
	-75.7949	3.70144	276.581
	-75.7295	3.88836	291.266
	-75.7538	4.26934	319.507
	-75.7882	3.90588	291.93
	-75.8125	3.67288	274.264
	-75.8062	3.63653	271.615
	-75.8377	3.2932	245.681
	-75.8022	3.3555	250.665
	-75.7551	3.45935	258.882
	-75.7993	3.46714	259.032
	-75.8371	3.62096	270.136
	-75.8803	3.27178	243.69
	-75.8759	2.86159	213.176
	-75.8245	3.44572	257.187
	-75.7913	3.20558	239.565
	-75.772	3.64173	272.355
	-75.8124	3.40223	254.057
	-75.8544	3.53269	263.379
	-75.8593	3.60538	268.748
	-75.8939	3.38341	251.874
	-75.8955	3.21466	239.298
	-75.8706	3.22699	240.443
	-75.8924	3.54242	263.725
	-75.9524	3.53658	262.694
	-75.96	3.69689	274.521
	-76.0059	3.44572	255.428
	-76.0485	3.46389	256.361
	-76.0691	3.18546	235.573
	-76.0366	3.65795	270.844
	-76.0833	3.40353	251.563
	-76.0892	3.54242	261.77
	-76.1067	3.33344	246.165
	-76.1394	4.19795	309.617
	-76.2053	3.66055	269.313
	-76.2301	3.53853	260.092
	-76.262	3.48401	255.777
	-76.3057	4.07658	298.781
	-76.3751	3.53593	258.48
	-76.4555	3.90004	284.228
	-76.5481	3.59045	260.753
1-1h-1
	-47.642	3.85331	523.424	327.22
	-47.2083	3.19714	441.353
	-46.8599	3.50803	490.575
	-46.4267	3.29709	468.559
	-45.9715	3.05825	442.032
	-45.5866	2.86743	420.422
	-45.1841	2.99464	445.687
	-44.853	2.62015	394.783
	-44.4428	2.61041	399.355
	-44.0603	2.6221	406.884
	-43.6626	2.45984	387.389
	-43.2299	2.03797	326.155
	-42.874	2.454	397.959
	-42.5546	2.33717	383.538
	-42.2272	2.30602	383.057
	-41.8633	2.4183	407.175
	-41.6039	2.03213	345.471
	-41.2571	1.8452	317.762
	-40.9883	1.70891	297.246
	-40.661	1.49148	262.601
	-40.3484	2.41895	430.863
	-40.0473	2.17102	391.054
	-39.7997	1.72124	312.907
	-39.497	2.09638	385.41
	-39.2254	1.46227	271.562
	-38.909	1.83806	345.384
	-38.5938	1.08713	206.689
	-38.3054	1.13776	218.645
	-38.0507	1.39413	270.458
	-37.8264	1.05533	206.446
	-37.5608	1.39867	276.322
	-37.3096	1.07869	215.106
	-36.9751	1.89518	382.644
	-36.7701	1.25069	254.454
	-36.5143	1.43891	295.541
	-36.2319	0.946292	196.413
	-36.0172	1.00535	210.342
	-35.7983	1.74395	367.846
	-35.6066	1.30131	276.447
	-35.3798	0.696414	149.198
	-35.1195	1.2455	269.422
	-34.9677	0.640597	139.358
	-34.7161	0.957974	210.356
	-34.5081	1.18968	263.26
	-34.3143	0.980042	218.438
	-34.1047	0.948888	213.148
	-33.9197	1.39348	315.171
	-33.802	1.76343	400.589
	-33.5851	1.20655	276.307
	-33.3725	1.35583	312.954
	-33.1426	2.05874	479.267
	-32.8284	1.32468	312.008
1-1h-2
	-65.913	7.39574	509.533	553.098
	-65.5777	7.74492	540.273
	-65.2316	8.01751	566.522
	-64.9147	7.93184	567.107
	-64.6396	8.29725	599.321
	-64.3615	7.94742	580.019
	-64.0969	8.02206	591.249
	-63.8434	7.8241	582.118
	-63.5582	7.62679	573.485
	-63.2705	7.54047	573.089
	-63.0042	7.3516	564.292
	-62.6852	7.26853	564.568
	-62.3473	7.33668	577.059
	-62.0526	6.89793	548.529
	-61.725	6.69089	538.583
	-61.371	6.64156	541.69
	-61.0507	6.67856	551.228
	-60.724	6.78759	567.066
	-60.4218	6.4832	547.755
	-60.1371	6.80707	581.229
	-59.8658	6.45269	556.556
	-59.5918	6.4475	561.798
	-59.3681	6.53966	574.582
	-59.1376	6.45204	571.76
	-58.8932	6.37741	570.303
	-58.6474	6.16322	556.208
	-58.4009	6.25279	569.481
	-58.1651	6.26772	575.863
	-57.9362	6.10935	566.108
	-57.7593	6.03277	562.699
	-57.5587	6.00616	564.408
	-57.3421	6.18659	586.058
	-57.1202	6.36897	608.326
	-56.9454	6.45399	620.461
	-56.7929	6.56563	634.778
	-56.6337	6.58834	640.752
	-56.502	6.41505	626.961
	-56.3511	6.27356	616.582
	-56.214	6.50527	642.616
	-56.1	6.33976	628.927
	-55.959	6.23202	621.488
	-55.7881	6.29108	631.372
	-55.6246	6.0425	610.124
	-55.4426	5.8134	590.977
	-55.2599	5.89128	602.972
	-55.053	5.46551	563.717
	-54.8099	5.52328	574.842
	-54.582	5.41489	568.355
	-54.3224	5.09102	539.544
	-54.06	5.08453	544.135
	-53.7628	4.74054	512.959
	-53.4605	4.95992	542.756
	-53.1538	4.5997	509.11
	-52.8278	4.5666	511.606
	-52.4944	4.25442	482.576
	-52.165	4.12461	473.614
	-51.8635	4.1668	483.847
	-51.5369	3.83125	450.318
	-51.1999	3.78062	449.966
	-50.892	4.02206	484.206
	-50.5951	4.04348	492.183
	-50.308	3.92471	482.85
	-50.0198	3.67094	456.494
	-49.7285	3.5262	443.268
	-49.4569	3.69495	469.189
	-49.2084	3.49699	448.173
	-48.9759	3.57942	462.715
	-48.7735	3.59889	468.743
	-48.5658	3.88057	509.342
	-48.4071	3.99415	527.349
	-48.2669	4.11033	545.52
	-48.1516	4.23105	563.951
	-48.0286	4.18043	559.756
	-47.9238	4.17913	561.765
	-47.8623	4.34853	585.871
	-47.7905	4.11552	555.962
	-47.6903	4.1337	560.5
	-47.5	4.39071	599.569
1-1h-3
	-63.3876	6.26317	473.961	307.848
	-62.8175	6.16322	476.382
	-62.2729	6.09248	480.54
	-61.7492	5.46357	439.409
	-61.2897	5.30001	433.595
	-60.733	5.23511	437.236
	-60.2736	5.09946	433.24
	-59.7776	4.88268	422.54
	-59.2703	4.57439	403.395
	-58.6876	4.39006	395.614
	-58.0834	4.31543	397.717
	-57.4809	4.3985	414.548
	-56.9598	4.56141	438.304
	-56.4599	4.37449	428.224
	-55.9766	4.48612	447.106
	-55.5284	4.19211	424.822
	-55.1114	3.9325	404.738
	-54.6528	3.95651	414.206
	-54.1581	3.75855	400.782
	-53.7022	3.70793	402.139
	-53.2534	3.16988	349.57
	-52.8293	3.02904	339.345
	-52.3552	3.22894	368.165
	-51.902	2.53188	293.593
	-51.4068	2.88171	340.36
	-50.9703	2.77202	332.758
	-50.5046	2.66234	325.17
	-50.0564	2.38455	296.134
	-49.5917	2.70647	341.963
	-49.1101	2.6883	345.799
	-48.7256	2.48191	323.846
	-48.3173	2.07886	275.404
	-47.8729	2.30926	311.017
	-47.528	2.00876	274.036
	-47.1212	1.90232	263.468
	-46.7426	1.88934	265.377
	-46.4013	1.87181	266.27
	-46.0285	2.07886	299.846
	-45.6897	1.82703	266.862
	-45.3598	1.61804	239.252
	-44.962	1.70566	255.962
	-44.6064	1.68619	256.406
	-44.2859	1.74006	267.766
	-43.9432	1.99059	310.241
	-43.6431	1.67516	264.01
	-43.2954	1.91076	305.054
	-43.0224	1.38179	222.856
	-42.7118	1.64855	268.963
	-42.4805	1.50446	247.573
	-42.2374	1.89583	314.804
	-41.8936	1.5473	260.235
	-41.6542	1.61025	273.242
	-41.4145	1.67386	286.576
	-41.123	1.62453	281.159
	-40.8685	1.32078	230.762
	-40.6187	1.28574	226.734
	-40.4133	1.18319	210.249
	-40.1928	1.46162	261.86
	-39.9644	1.25393	226.566
	-39.6891	1.24874	227.948
	-39.4852	0.983936	180.977
	-39.2345	1.38309	256.771
	-39.0327	1.40775	263.316
	-38.8578	1.36038	256.115
	-38.6152	1.14619	217.745
	-38.3556	1.14165	218.984
	-38.1777	1.15528	223.068
	-37.965	1.43372	279.025
	-37.7824	0.832062	163.037
	-37.5418	1.16567	230.454
	-37.3617	1.08908	216.758
	-37.2049	1.30845	261.939
	-37.066	1.42333	286.41
	-36.9343	1.26042	254.874
	-36.841	1.06896	216.909
	-36.6996	0.803504	163.904
	-36.4802	1.08259	222.639
	-36.3314	1.39023	287.49
	-36.1683	1.12413	233.876
1-1h-4
	Origin(1)mV	Origin-X(1)uV
	-65.3101	12.9171	909.953	774.726
	-65.3115	11.9915	844.726
	-65.2326	11.9442	843.865
	-65.1996	11.7611	831.952
	-65.1728	11.5963	821.115
	-65.148	11.7157	830.332
	-65.1325	11.9688	848.753
	-65.1697	11.767	833.294
	-65.1802	11.7533	832
	-65.2015	11.5242	815.142
	-65.2073	11.68	825.981
	-65.2642	11.6982	825.52
	-65.2863	11.5165	812.035
	-65.3454	11.5573	813.124
	-65.4199	11.5366	809.425
	-65.4948	11.436	800.139
	-65.5303	11.4314	798.763
	-65.5489	11.2536	785.8
	-65.5576	11.2646	786.314
	-65.5375	11.2542	786.175
	-65.5488	11.018	769.356
	-65.5708	11.3263	790.232
	-65.5856	11.1634	778.441
	-65.5801	11.519	803.394
	-65.6389	11.1095	773.151
	-65.6672	11.4035	792.772
	-65.6901	11.0725	769.113
	-65.7052	11.1848	776.475
	-65.6998	11.227	779.561
	-65.7064	11.0959	770.271
	-65.6869	10.8778	755.682
	-65.6638	11.1264	773.611
	-65.6833	11.2724	783.192
	-65.6445	11.1822	778.048
	-65.6388	11.2627	783.813
	-65.679	10.9421	760.371
	-65.6513	10.9901	764.492
	-65.633	10.9868	764.782
	-65.593	10.9531	763.571
	-65.5808	10.8142	754.233
	-65.5524	10.9472	764.312
	-65.5428	10.9901	767.58
	-65.5538	10.8311	756.169
	-65.5301	10.7207	749.123
	-65.4634	11.0913	776.934
	-65.3398	11.031	776.268
	-65.2822	10.7804	760.263
	-65.1683	11.1225	787.708
	-64.7458	11.5924	833.964
	-64.8146	11.1692	801.477
	-64.8518	11.3412	812.691
	-64.8647	10.9609	785.071
	-64.8854	10.6091	759.297
	-64.8111	10.8635	779.648
	-64.7492	10.9414	787.045
	-64.6894	10.8473	782.013
	-64.6303	10.7772	778.669
	-64.5632	10.6136	768.766
	-64.4993	10.7246	778.65
	-64.4552	10.8596	789.741
	-64.4688	10.9635	796.892
	-64.5237	10.8389	786.233
	-64.6165	10.3631	749.142
	-64.6766	10.2125	736.611
	-64.7143	9.95553	717.076
	-64.7263	9.87764	711.151
	-64.72	10.0866	726.361
	-64.7084	9.96786	718.122
	-64.6982	9.90555	713.904
	-64.6573	9.69461	699.768
	-64.6234	10.0431	725.829
	-64.5887	9.65243	698.502
	-64.5551	9.82896	712.162
	-64.5215	9.93346	720.63
	-64.4628	9.76341	709.843
	-64.4432	9.5051	691.571
	-64.4196	9.98343	727.001
	-64.3962	9.81339	715.244
	-64.3519	9.74199	711.211
	-64.3304	9.25911	676.507
1-1h-5
	-82.4233	3.13418	116.945	124.426
	-82.3242	2.38195	89.2071
	-82.0727	2.35794	89.1369
	-81.8247	2.81031	107.22
	-81.7073	3.27502	125.494
	-81.601	2.8512	109.687
	-81.4869	3.09524	119.581
	-81.3637	3.18026	123.429
	-81.2626	3.31981	129.329
	-81.1793	3.06603	119.814
	-81.1073	3.01151	117.999
	-80.99	2.8856	113.559
	-80.8642	3.10562	122.79
	-80.8076	2.7506	108.983
	-80.7263	3.2536	129.301
	-80.6775	2.99529	119.252
	-80.5503	2.99918	119.973
	-80.5074	2.92974	117.382
	-80.4242	3.17702	127.683
	-80.3689	3.32824	134.035
	-80.3229	3.35291	135.259
	-80.3332	3.33214	134.37
	-80.3147	2.73827	110.5
	-80.1526	2.66947	108.374
	-79.9731	2.80902	114.802
	-79.9117	3.20947	131.466
	-79.8717	3.09978	127.162
	-79.8427	3.38925	139.186
	-79.8719	3.11276	127.694
	-79.8203	3.27372	134.554
	-79.8228	3.36069	138.115
	-79.7748	3.41262	140.5
	-79.7793	3.50478	144.269
	-79.8059	3.09394	127.233
	-79.776	2.94142	121.096
	-79.7637	2.97582	122.568
	-79.7409	3.20103	131.955
	-79.803	3.30358	135.868
	-79.7702	3.19065	131.384
	-79.7148	3.71766	153.399
	-79.7249	3.38795	139.743
	-79.6996	3.26983	134.998
	-79.701	3.38925	139.921
	-79.7388	3.51776	145.022
	-79.7809	3.22634	132.801
	-79.7641	2.92195	120.348
	-79.7724	3.21336	132.308
	-79.7708	3.59889	148.19
	-79.8362	3.37108	138.473
	-79.8116	3.43404	141.188
	-79.858	3.36589	138.148
	-79.8363	2.9226	120.052
	-79.7914	2.96154	121.855
	-79.7451	2.96478	122.198
	-79.7383	2.89793	119.473
	-79.7073	3.35291	138.388
	-79.7348	3.08421	127.169
	-79.7383	3.20298	132.048
	-79.7215	3.1251	128.918
	-79.7325	3.19584	131.782
	-79.7335	2.71361	111.895
	-79.6758	2.62858	108.621
	-79.5802	2.94726	122.222
	-79.5047	3.16793	131.742
	-79.5155	3.14651	130.799
	-79.5321	3.40742	141.556
	-79.5834	3.43144	142.283
	-79.5748	2.42089	100.415
	-79.4507	2.33847	97.4452
	-79.2977	2.66883	111.844
	-79.1451	2.68181	113.027
	-79.0492	2.88885	122.187
	-78.9582	2.16907	92.0556
	-78.789	2.11195	90.1968
	-78.6787	2.76099	118.398
	-78.6686	2.44686	104.968
	-78.6005	2.85445	122.762
	-78.5236	3.00373	129.551
	-78.5236	3.03099	130.726
	-78.5571	3.0245	130.284
	-78.5259	2.82784	121.955
1-1h-6
	Origin(1)mV	Origin-X(1)uV
	-82.7306	2.19568	80.9992	175.266
	-82.265	4.07853	153.076
	-82.1164	4.09735	154.633
	-82.0737	3.94093	148.967
	-82.004	3.75011	142.122
	-81.8754	3.70273	140.998
	-81.6658	2.86678	110.022
	-81.2907	1.92309	74.8421
	-80.179	1.65114	66.9684
	-79.6248	3.64043	150.715
	-79.4281	1.55054	64.6674
	-78.9349	2.63508	111.929
	-78.6313	3.81047	163.686
	-78.6386	4.43939	190.647
	-78.6606	4.21482	180.856
	-78.7335	4.3641	186.755
	-78.8108	4.94304	210.92
	-78.8489	2.37871	101.363
	-78.5767	3.1926	137.425
	-78.5166	4.78013	206.211
	-78.5941	4.16355	179.099
	-78.6699	4.75612	204.01
	-78.7646	4.85672	207.593
	-78.8322	3.8293	163.271
	-78.7598	2.62145	112.076
	-78.4336	3.94158	170.565
	-78.3917	3.926	170.156
	-78.4232	4.63345	200.579
	-78.4977	4.46016	192.544
	-78.5004	3.5223	152.046
	-78.3273	3.90588	169.689
	-78.2826	3.79425	165.114
	-78.1702	4.62696	202.189
	-78.2028	4.70484	205.343
	-78.2372	4.46795	194.756
	-78.2689	4.16874	181.501
	-78.222	4.48352	195.545
	-78.2378	4.25896	185.643
	-78.2317	4.34723	189.533
	-78.1513	4.15187	181.558
	-78.0486	4.59126	201.538
	-78.0232	4.75677	208.999
	-78.1065	4.59126	201.105
	-78.1401	4.81777	210.762
	-78.2042	4.86645	212.385
	-78.2799	4.38552	190.861
	-78.3004	4.21807	183.434
	-78.3201	4.53804	197.203
	-78.3349	4.2648	185.228
	-78.2875	4.24013	184.482
	-78.1952	3.84747	167.974
	-78.0982	4.15706	182.144
	-78.0681	4.5017	197.464
	-78.1401	4.59061	200.825
	-78.1786	4.64838	203.062
	-78.2668	4.18367	182.166
	-78.2778	4.52246	196.835
	-78.3347	4.70354	204.283
	-78.369	4.90734	212.862
	-78.4638	4.52182	195.452
	-78.5214	4.46146	192.431
	-78.6067	4.7983	206.303
	-78.6706	4.58931	196.85
	-78.7257	4.05776	173.697
	-78.6313	4.30569	184.956
	-78.613	4.88073	209.797
	-78.7149	4.15446	177.907
	-78.7356	4.098	175.355
	-78.6904	4.00389	171.616
	-78.6093	3.65406	157.096
	-78.5065	3.99156	172.261
	-78.4875	4.1947	181.154
	-78.518	4.30439	185.68
	-78.5517	4.61852	198.98
	-78.6476	4.33814	186.237
	-78.691	4.55492	195.228
	-78.774	4.18627	178.876
	-78.8106	4.09929	174.922
	-78.8298	4.30893	183.736
	-78.8525	4.31542	183.857
	-78.9137	4.46795	189.923
1-1h-7
	Origin(1)mV	Origin-X(1)uV
	-84.7184	2.9531	101.183	103.431
	-84.6907	2.75385	94.4541
	-84.6433	2.55395	87.7526
	-84.5724	2.73697	94.2887
	-84.5544	2.65065	91.3762
	-84.494	2.84926	98.4431
	-84.4732	2.76748	95.6917
	-84.4279	2.63183	91.1549
	-84.4003	2.84601	98.6737
	-84.3806	2.82005	97.8453
	-84.372	2.75839	95.7367
	-84.3212	2.71296	94.3379
	-84.2679	2.76034	96.1756
	-84.2423	2.56758	89.545
	-84.1839	2.77007	96.8162
	-84.1595	2.69998	94.4523
	-84.0975	2.91286	102.134
	-84.0587	3.0576	107.363
	-84.0295	2.72789	95.8905
	-84.0253	2.89728	101.86
	-84.0083	2.72789	95.9661
	-83.967	2.61301	92.0661
	-83.9446	3.03423	106.995
	-83.8992	2.72334	96.1951
	-83.8637	2.89079	102.244
	-83.8709	3.08356	109.033
	-83.8686	3.0563	108.078
	-83.8826	3.13872	110.935
	-83.8778	3.06798	108.454
	-83.8684	2.90053	102.571
	-83.88	3.19	112.758
	-83.8862	3.14457	111.126
	-83.8818	3.07642	108.736
	-83.9077	2.82589	99.7857
	-83.898	3.07577	108.648
	-83.871	2.98815	105.659
	-83.8467	3.24322	114.781
	-83.8377	3.01476	106.732
	-83.8223	2.89664	102.609
	-83.8422	2.99399	105.979
	-83.8564	3.08421	109.114
	-83.8767	3.16079	111.739
	-83.9264	3.23543	114.166
	-83.9823	3.30877	116.512
	-84.0303	3.17961	111.765
	-84.0708	3.15949	110.891
	-84.1265	3.1212	109.32
	-84.168	3.2536	113.782
	-84.2247	3.19454	111.481
	-84.2708	3.27307	114.026
	-84.346	3.12315	108.5
	-84.4122	3.27307	113.429
	-84.4896	3.34317	115.525
	-84.5506	3.05046	105.173
	-84.5959	3.04202	104.705
	-84.6437	3.36394	115.579
	-84.6876	3.018	103.525
	-84.7188	3.11471	106.719
	-84.751	3.23997	110.877
	-84.7797	3.27827	112.068
	-84.7861	3.15949	107.983
	-84.8373	3.11731	106.339
	-84.8589	2.93298	99.971
	-84.8465	3.02449	103.137
[truncated: 5,865 more rows]
