# Supplementary material for: Ion Flux in Roots of Chinese Fir (Cunninghamia lanceolata (Lamb.) Hook) under Aluminum Stress
Source: PLoS One. 2016 Jun 6;11(6):e0156832. doi: 10.1371/journal.pone.0156832 (PMC4894599; doi:10.1371/journal.pone.0156832)
Supplement: S3 Table — (XLSX) [file pone.0156832.s004.xlsx]

## Sheet: Ca2+
0-1h-1			流速
	1.64589	-0.712846	-34.7444	-16.3122
	1.55408	-0.858272	-41.5346
	1.49411	-0.689474	-33.2098
	1.45049	-0.421994	-20.2567
	1.44977	-0.377847	-18.1364
	1.40741	-0.425241	-20.3441
	1.41985	-0.605724	-29.0072
	1.39757	-0.677139	-32.371
	1.42126	-0.410308	-19.6509
	1.35432	-0.756993	-36.0669
	1.36893	-0.405115	-19.3232
	1.3833	-0.391481	-18.6938
	1.34903	-0.159059	-7.57488
	1.35405	-0.253846	-12.0938
	1.33798	-0.879047	-41.8292
	1.34124	-0.433031	-20.6102
	1.34588	-0.75959	-36.1668
	1.31824	-0.813475	-38.6493
	1.25555	-0.553137	-26.1516
	1.26637	-0.162955	-7.71057
	1.24894	-0.475231	-22.4566
	1.26025	-0.62585	-29.6004
	1.2447	-0.789454	-37.2935
	1.22762	-0.528467	-24.9308
	1.22622	-0.154515	-7.28836
	1.23773	-0.0792051	-3.73938
	1.19554	-0.694019	-32.6595
	1.20482	-0.633641	-29.8397
	1.18803	-0.260987	-12.2741
	1.21166	-0.215542	-10.1555
	1.20836	-0.756993	-35.6588
	1.19219	-0.291501	-13.7136
	1.19996	-0.109719	-5.16476
	1.19465	-0.484969	-22.82
	1.22162	-0.598583	-28.2256
	1.21366	-0.338894	-15.97
	1.21616	-0.669348	-31.5492
	1.18723	-0.105174	-4.9459
	1.16707	0.0415502	1.95084
	1.17911	-0.393429	-18.4901
	1.20297	-0.0856973	-4.03493
	1.23075	-0.0376549	-1.77676
	1.16999	-0.181782	-8.53703
	1.15943	-0.347983	-16.3291
	1.21345	-0.272673	-12.8491
	1.16469	-0.314873	-14.7814
	1.13481	-0.560928	-26.2715
	1.16664	-0.0363564	-1.70694
	1.16546	-0.457052	-21.4574
	1.13932	-0.264233	-12.3796
	1.15658	-0.185028	-8.68039
	1.15294	-0.705055	-33.0689
	1.13103	-0.653767	-30.6109
	1.14917	-0.142829	-6.69678
	1.15598	-0.251898	-11.817
	1.16155	-0.320067	-15.0216
	1.16686	-0.233071	-10.9431
	1.15421	-0.561577	-26.3417
	1.1818	-0.0558331	-2.62448
	1.15416	-0.365512	-17.1446
	1.1868	-0.170096	-7.99869
	1.17457	-0.695966	-32.6976
	1.17549	-0.0915403	-4.30082
	1.17286	0.0616761	2.89709
	1.16877	-0.430434	-20.2129
	1.16307	-0.520027	-24.4095
	1.1767	-0.396675	-18.6391
	1.20028	-0.61806	-29.0956
	1.17997	-0.343439	-16.1417
	1.17386	-0.672594	-31.5978
	1.14592	-0.331103	-15.5206
	1.16906	-0.152567	-7.16447
	1.17761	0.129195	6.07084
	1.16861	-0.374601	-17.5908
	1.17875	-0.135038	-6.3461
	1.17525	-0.390183	-18.332
	1.17009	-0.052587	-2.46964
	1.1761	-0.35902	-16.8689
	1.19045	-0.116211	-5.4663
	1.15521	-0.0571316	-2.67996
	1.18804	-0.251898	-11.8466
	1.19456	-0.277867	-13.0746
	1.21397	-0.43433	-20.4679
	1.23023	-0.339543	-16.0212
	1.21095	-0.353826	-16.6701
	1.2471	-0.5012	-23.6804
	1.27318	-0.568719	-26.9253
	1.23972	-0.0960849	-4.537
	1.26812	-0.0149321	-0.706633
	1.26787	-0.418099	-19.786
	1.26629	-0.32591	-15.4212
	1.26664	-0.204505	-9.67683
	1.30641	-0.0856973	-4.06761
	1.31037	0.0675191	3.20573
	1.28929	-0.399272	-18.9266
	1.29194	-0.134389	-6.37158
	1.30895	-0.240861	-11.4348
	1.31117	0.0266181	1.26388
	1.33955	-0.162306	-7.72381
	1.35421	-0.295396	-14.0735
	1.38419	-0.27527	-13.1453
	1.40692	-0.128546	-6.14944
	1.3059	0.0246704	1.17092
	1.37871	-0.25904	-12.365
	1.39514	-0.319417	-15.2666
	1.38883	-0.291501	-13.9255
	1.37776	-0.321365	-15.3389
	1.36022	-0.555085	-26.4588
	1.39389	-0.448613	-21.4397
	1.40372	-0.412905	-19.7482
	1.41766	-0.248003	-11.8741
	1.39827	0.0512886	2.45188
	1.40896	-0.0681683	-3.26157
	1.41735	-0.594038	-28.442
	1.41504	-0.60118	-28.7788
	1.40407	0.0253197	1.21097
	1.42634	-0.531064	-25.4446
	1.42071	-0.246704	-11.8147
	1.39843	-0.234369	-11.2045
	1.43076	-0.210997	-10.1126
0-1h-2
	0.121363	-0.162955	-7.05204	-7.34014
	0.152438	-0.451209	-19.5743
	0.169264	-0.580405	-25.2124
	0.188466	-0.614813	-26.7472
	0.154478	-0.453806	-19.6901
	0.175186	-0.466791	-20.2863
	0.235757	-0.360318	-15.7331
	0.18942	-0.64273	-27.9638
	0.189235	-0.0447963	-1.94887
	0.265478	0.20061	8.77945
	0.237774	-0.315522	-13.7792
	0.24847	0.0415502	1.81601
	0.272983	-0.393429	-17.2288
	0.32082	-0.28371	-12.4704
	0.305374	0.0480424	2.10909
	0.292159	-0.545347	-23.9175
	0.306013	-0.59274	-26.0243
	0.380097	-0.212945	-9.40324
	0.346908	-0.146075	-6.43369
	0.391095	-0.0396026	-1.75025
	0.377717	-0.520027	-22.9597
	0.389169	-0.298642	-13.1969
	0.359732	-0.452508	-19.9505
	0.38882	-0.120755	-5.3359
	0.344149	0.0837497	3.68779
	0.383529	-0.533011	-23.5436
	0.373047	-0.338245	-14.9282
	0.343469	-0.165552	-7.28958
	0.363085	-0.102577	-4.52356
	0.388484	0.0545347	2.40967
	0.404323	-0.414853	-18.354
	0.377273	0.0142829	0.630555
	0.439375	0.0454456	2.01605
	0.464791	-0.0253197	-1.12546
	0.469593	0.127248	5.65822
	0.449032	-0.346035	-15.3627
	0.456696	-0.25839	-11.4784
	0.47961	-0.519378	-23.1139
	0.491675	0.000649222	0.0289184
	0.474392	0.24216	10.7718
	0.516667	-0.0610269	-2.72365
	0.550034	0.177238	7.93063
	0.575548	0.173342	7.77175
	0.510158	0.527818	23.5436
	0.538263	0.252547	11.29
	0.561353	0.38434	17.2125
	0.543971	0.44212	19.7732
	0.555368	-0.310977	-13.9212
	0.533965	0.166201	7.42747
	0.542938	-0.457702	-20.4699
	0.56018	0.340192	15.234
	0.58564	0.120755	5.41831
	0.558339	0.420696	18.8362
	0.564285	0.527818	23.6432
	0.585901	0.459	20.5953
	0.610772	0.482372	21.686
	0.615065	0.544048	24.4668
	0.577709	0.161007	7.21994
	0.581428	0.427188	19.1613
	0.576357	-0.179185	-8.03445
	0.610675	-0.0960849	-4.31985
	0.575116	0.307082	13.7674
	0.605847	0.217489	9.7741
	0.590859	0.0902419	4.05084
	0.582159	0.435628	19.541
	0.595479	0.282412	12.6815
	0.59979	0.606374	27.2372
	0.609193	0.366161	16.4596
	0.626724	0.0532362	2.3964
	0.613684	-0.153216	-6.89004
	0.618742	0.187625	8.4405
	0.618662	0.173992	7.82716
	0.587563	0.207751	9.32318
	0.61539	0.323962	14.5698
	0.626191	-0.308381	-13.8814
	0.627082	-0.0869958	-3.91622
	0.632074	0.0733621	3.30373
	0.647775	-0.177238	-7.99152
	0.607802	0.194767	8.75431
	0.644405	0.260987	11.7642
	0.580747	0.322014	14.4431
	0.65712	-0.122703	-5.53659
	0.664383	0.252547	11.4015
	0.634485	0.103226	4.64946
	0.590387	0.0960849	4.31296
	0.613019	0.240861	10.8305
	0.598032	-0.093488	-4.19896
	0.601752	0.0168798	0.758359
	0.520527	-0.255144	-11.3907
	0.506681	0.3759	16.7629
	0.434106	-0.275919	-12.2355
	0.454125	0.262286	11.6487
	0.463759	0.366161	16.274
	0.444749	-0.390832	-17.3458
	0.427764	-0.0428487	-1.89914
	0.369188	0.120106	5.299
	0.34528	-0.139583	-6.14697
	0.3052	-0.184379	-8.09439
	0.295139	-0.487566	-21.3883
	0.258503	-0.605724	-26.496
	0.249258	-0.832952	-36.41
	0.277577	-0.477178	-20.9039
	0.256018	-0.762836	-33.3625
	0.237799	-0.203207	-8.87421
	0.177399	-0.431084	-18.7377
	0.199071	-0.0928388	-4.04209
	0.164048	-0.147373	-6.39897
	0.163043	-0.104525	-4.53813
	0.143995	-0.276569	-11.99
	0.127924	-0.468738	-20.296
	0.118058	-0.535608	-23.1737
	0.0997521	-0.248652	-10.7426
	0.0718368	-0.305784	-13.1823
	0.0683979	-0.456403	-19.6704
	0.0436736	-0.584949	-25.1622
	0.0648058	-0.611567	-26.3506
	0.0171704	-0.273323	-11.7327
	0.0200419	-0.193468	-8.30666
	0.0397445	-0.35902	-15.4386
	-0.0270981	-0.623903	-26.6903
	-0.013719	-0.321365	-13.7619
	-0.077248	-0.378497	-16.1284
	-0.0721146	-0.640782	-27.3163
	-0.101124	-0.475231	-20.2129
	-0.0984282	-0.46744	-19.8857
	-0.116038	-0.21684	-9.21191
	-0.110823	-0.222683	-9.46399
	-0.178833	-0.0999802	-4.22663
	-0.207039	-0.299941	-12.6522
	-0.188242	-0.521975	-22.0509
	-0.20012	-0.655065	-27.6479
	-0.175404	-0.732323	-30.9685
	-0.184689	-0.456403	-19.286
	-0.225844	-0.327208	-13.7822
	-0.206113	0.286307	12.0774
	-0.178094	-0.135687	-5.73647
	-0.195199	-0.514184	-21.7099
	-0.179334	-0.327857	-13.8597
	-0.171947	-0.490163	-20.7332
	-0.180385	0.00194767	0.0823264
	-0.201758	-0.453806	-19.1508
	-0.268765	-0.6674	-28.0182
	-0.234116	-0.98487	-41.4588
	-0.237471	-0.396026	-16.6659
	-0.259354	-0.309679	-13.0099
	-0.281189	-0.819968	-34.3903
	-0.241086	-0.18373	-7.72956
	-0.273484	0.0558331	2.34294
	-0.265609	-0.494707	-20.7732
	-0.288024	-0.312925	-13.1169
	-0.251414	-0.231772	-9.74289
	-0.262291	-0.278516	-11.698
	-0.248593	-0.60897	-25.6054
	-0.23456	-0.116211	-4.89149
	-0.237136	-0.590143	-24.8359
	-0.239548	-0.51743	-21.7716
	-0.199178	-0.373952	-15.784
	-0.263274	-0.37525	-15.7598
	-0.214038	-0.760888	-32.0798
	-0.192385	-0.414204	-17.4923
	-0.221593	-0.144777	-6.10005
	-0.252117	-0.547294	-23.0056
	-0.225761	-0.357072	-15.0403
	-0.239456	-0.63429	-26.6891
	-0.20047	-0.568719	-24.0027
	-0.174774	-0.132441	-5.60068
	-0.186471	-0.31682	-13.3857
0-1h-3
	0.988198	0.0869958	4.028	-12.4438
	1.00708	-0.488864	-22.6693
	1.04954	0.0460948	2.14448
	1.07727	-0.276569	-12.895
	1.13576	-0.29215	-13.6838
	1.15954	-0.310328	-14.5622
	1.18745	-0.387586	-18.2273
	1.24397	-0.340842	-16.0998
	1.27465	0.210997	9.98994
	1.33776	0.235668	11.213
	1.37333	-0.00129844	-0.0619522
	1.39259	-0.151918	-7.25942
	1.39763	-0.244108	-11.6694
	1.43525	0.111666	5.35364
	1.45205	-0.31747	-15.241
	1.46067	-0.180484	-8.67036
	1.50058	-0.0103876	-0.500564
	1.52019	0.259689	12.5329
	1.55697	0.248652	12.0347
	1.57702	0.0389533	1.88832
	1.59036	0.347983	16.8861
	1.61731	0.247354	12.0284
	1.63918	0.277218	13.5036
	1.67457	0.0220736	1.07822
	1.66715	0.235668	11.5047
	1.65225	0.16685	8.1358
	1.68431	0.146075	7.14063
	1.61551	0.0370057	1.7993
	1.62923	-0.0688176	-3.34967
	1.6308	-0.190222	-9.2602
	1.57712	0.262286	12.7146
	1.56944	0.117509	5.69302
	1.61965	-0.265532	-12.9152
	1.59735	-0.117509	-5.70553
	1.5932	-0.669997	-32.5219
	1.59803	-0.064273	-3.12086
	1.58306	-0.557682	-27.0484
	1.62059	0.309679	15.0629
	1.57975	-0.533011	-25.8451
	1.5632	0.349282	16.9133
	1.58046	0.13374	6.48493
	1.59141	-0.181782	-8.82219
	1.67576	-0.622604	-30.4165
	1.65468	-0.296695	-14.4705
	1.63413	-0.788805	-38.4116
	1.61858	-0.707652	-34.4178
	1.5832	0.23372	11.3352
	1.60274	-0.321365	-15.6104
	1.61293	-0.820617	-39.8948
	1.58402	-0.236966	-11.4938
	1.53566	-0.459649	-22.2113
	1.58667	-0.394078	-19.1185
	1.57015	-0.244757	-11.8589
	1.59037	-0.017529	-0.850633
	1.52884	-0.0753098	-3.6371
	1.56011	-0.573263	-27.7545
	1.50979	-0.231123	-11.1457
	1.56751	-0.65961	-31.9536
	1.54446	-0.131792	-6.3727
	1.50459	-0.899173	-43.3464
	1.55071	-0.00324611	-0.157038
	1.56759	-0.814774	-39.471
	1.57321	-0.173342	-8.40065
	1.54038	-0.405115	-19.5832
	1.56374	-0.397973	-19.273
	1.5556	-0.693369	-33.5579
	1.59993	-0.568719	-27.6201
	1.58105	-0.256443	-12.4356
	1.58179	-0.38434	-18.639
	1.57498	-0.558331	-27.0629
	1.65518	-0.373303	-18.2076
	1.70789	-0.152567	-7.47187
	1.68408	-0.159059	-7.77537
	1.70927	-0.222683	-10.907
	1.74475	-0.670647	-32.9404
	1.72688	-0.829057	-40.6649
	1.7636	-0.163604	-8.04729
	1.74047	0.0499901	2.45442
	1.68867	-0.299941	-14.6676
	1.69383	-0.344088	-16.8333
	1.67967	-0.294747	-14.4035
	1.68932	-0.542101	-26.5115
	1.68546	-0.452508	-22.1231
	1.66298	-0.482372	-23.5419
	1.63791	0.223982	10.9094
	1.62674	-0.283061	-13.7754
	1.65424	-0.452508	-22.0693
	1.63999	-0.813475	-39.6311
	1.72481	-0.469388	-23.0189
	1.61284	-0.721935	-35.0968
	1.64886	-0.60962	-29.7197
	1.62687	-0.428487	-20.8532
	1.61888	-0.471335	-22.9243
	1.60729	-0.673243	-32.7154
	1.62645	-0.297344	-14.4702
	1.60281	-0.727778	-35.3532
	1.61966	-0.323962	-15.7573
	1.63656	-0.115562	-5.62817
	1.60143	-0.514833	-25.0059
	1.60583	-0.554436	-26.9388
	1.61115	-0.563525	-27.3918
	1.57241	-0.0889434	-4.31016
	1.59341	-0.481723	-23.383
	1.54787	-0.20061	-9.70297
	1.57886	0.0610269	2.95879
	1.53853	-0.46744	-22.5928
	1.52249	-0.736867	-35.5713
	1.51313	-0.645976	-31.1607
	1.51759	-0.678437	-32.738
	1.62229	0.0155813	0.757999
	1.56086	-0.395376	-19.1429
	1.57789	0.244757	11.8656
	1.53025	-0.324611	-15.6792
	1.56248	0.0298642	1.44607
	1.50467	-0.679086	-32.7363
	1.54968	-0.309679	-14.9806
	1.58422	-0.0850481	-4.12519
	1.55115	-0.527818	-25.5363
	1.46991	-0.0792051	-3.80769
	1.54978	-0.326559	-15.7973
	1.58077	0.353177	17.1254
	1.49671	-0.00259689	-0.125103
0-1h-4
	2.04346	0.323313	16.2532	9.27352
	2.05134	0.225929	11.3647
	2.01703	0.260338	13.0605
	2.00949	0.256443	12.8576
	1.97675	0.148023	7.40273
	1.94479	0.0454456	2.26713
	1.97898	0.165552	8.2808
	2.01082	0.318768	15.984
	2.01763	0.138284	6.93776
	2.05081	0.0681683	3.42891
	2.07274	-0.153866	-7.75293
	2.11914	-0.138934	-7.02591
	2.15217	-0.139583	-7.07693
	2.12007	-0.136986	-6.9279
	2.20415	0.140232	7.13855
	2.24395	-0.040901	-2.08858
	2.27272	0.275919	14.1209
	2.30904	0.159709	8.19679
	2.34416	-0.238914	-12.2958
	2.36338	0.372654	19.2067
	2.36148	0.0441471	2.27508
	2.29993	0.241511	12.3862
	2.38992	0.565473	29.2046
	2.38895	0.299291	15.4564
	2.38222	0.14218	7.3389
	2.40743	-0.112965	-5.8425
	2.42594	0.432382	22.394
	2.44187	-0.0168798	-0.875357
	2.46646	0.00649222	0.337321
	2.49805	-0.0188274	-0.980642
	2.49616	-0.087645	-4.56442
	2.45734	0.252547	13.1122
	2.50414	0.288904	15.0546
	2.50737	0.43368	22.6042
	2.54654	0.355125	18.5665
	2.54954	0.229175	11.9846
	2.53224	0.32526	16.9862
	2.56132	0.178536	9.34506
	2.58383	0.348632	18.2802
	2.54634	0.460948	24.0986
	2.57692	0.301888	15.8207
	2.55248	0.0785559	4.10903
	2.58743	0.565473	29.6578
	2.58386	-0.0811528	-4.25531
	2.6765	0.479126	25.3044
	2.61007	0.0402518	2.11493
	2.66102	0.501849	26.4725
	2.62206	0.458351	24.1047
	2.57378	0.268778	14.0821
	2.61457	0.344088	18.0852
	2.57488	0.223332	11.7021
	2.65417	-0.0344088	-1.81417
	2.63668	0.275919	14.5273
	2.61802	0.229175	12.0487
	2.66917	0.397973	21.0065
	2.61075	-0.00714144	-0.375251
	2.60915	0.24216	12.7226
	2.6264	0.0564823	2.9715
	2.61587	0.5843	30.7132
	2.62757	0.182431	9.59838
	2.64958	0.151269	7.97252
	2.59146	0.599232	31.4382
	2.61199	0.376549	19.7873
	2.61884	0.203207	10.6842
	2.6344	0.152567	8.03142
	2.61396	-0.0493409	-2.5933
	2.59058	0.178536	9.3664
	2.5975	0.214893	11.2798
	2.58046	0.232422	12.1837
	2.6325	0.30903	16.2653
	2.59066	0.0746606	3.91692
	2.55009	0.540802	28.2815
	2.60415	0.0246704	1.29565
	2.61904	0.393429	20.6857
	2.61079	0.138934	7.30031
	2.60076	0.224631	11.794
	2.57788	0.457702	23.9878
	2.39284	0.0681683	3.52158
	2.51529	0.494058	25.767
	2.45821	-0.0272673	-1.41584
	2.46081	0.314224	16.3188
	2.43019	0.0564823	2.92639
	2.47626	0.165552	8.60817
	2.43353	0.190871	9.89164
	2.46578	-0.149321	-7.75806
	2.40486	0.0240212	1.2421
	2.41531	-0.205803	-10.6507
	2.42012	-0.159709	-8.26829
	2.40233	0.238265	12.3177
	2.31574	-0.212296	-10.9017
	2.36246	-0.173342	-8.93384
	2.45353	-0.00519378	-0.269585
0-1h-5
	1.0901	-0.491461	-22.9377	-9.54608
	1.07248	-0.391481	-18.2462
	1.14183	-0.245406	-11.4998
	1.18203	-0.118808	-5.58479
	1.19562	-0.075959	-3.57437
	1.2231	-0.114263	-5.38837
	1.19963	0.0980326	4.61446
	1.20181	0.0636238	2.99533
	1.26753	-0.0779067	-3.68663
	1.2685	-0.145426	-6.88228
	1.34294	-0.198662	-9.45644
	1.30304	-0.526519	-24.9854
	1.36588	-0.440173	-20.9904
	1.35411	-0.294098	-14.0116
	1.45907	-0.501849	-24.1062
	1.45606	-0.565473	-27.1561
	1.41472	0.139583	6.68135
	1.45506	-0.461597	-22.1657
	1.5025	-0.0779067	-3.7548
	1.53324	-0.478477	-23.1168
	1.50875	-0.474581	-22.8848
	1.58263	-0.179185	-8.6902
	1.56726	-0.326559	-15.8188
	1.58242	-0.182431	-8.84749
	1.58953	-0.445366	-21.6117
	1.55196	-0.0772574	-3.73789
	1.523	-0.34214	-16.5165
	1.55691	-0.502498	-24.3222
	1.57044	-0.219437	-10.6323
	1.58113	0.336946	16.3388
	1.62108	-0.523922	-25.4864
	1.5759	-0.346685	-16.8051
	1.5948	0.345386	16.7659
	1.56495	-0.154515	-7.48341
	1.63584	-0.0954357	-4.6477
	1.61627	-0.296045	-14.3956
	1.65201	-0.480424	-23.4268
	1.57948	-0.598583	-29.0242
	1.65366	-0.479775	-23.3981
	1.6641	-0.494707	-24.146
	1.65873	-0.205154	-10.0089
	1.67958	0.264883	12.9435
	1.633	0.244108	11.8851
	1.64669	0.113614	5.53757
	1.64852	-0.215542	-10.5073
	1.71345	0.436277	21.3747
	1.69015	-0.585598	-28.6406
	1.69408	-0.38434	-18.8029
	1.71333	-0.171395	-8.39754
	1.71283	-0.15062	-7.37936
	1.73798	0.355125	17.4322
	1.72696	0.194117	9.52065
	1.72411	0.0415502	2.03744
	1.77003	-0.596635	-29.3628
	1.78254	-0.0947864	-4.66918
	1.75976	0.226579	11.1412
	1.81756	-0.516781	-25.5271
	1.80372	-0.31682	-15.6326
	1.82444	-0.0551839	-2.72725
	1.83299	-0.290852	-14.3841
	1.87011	-0.0357072	-1.77098
	1.85198	0.0720637	3.56909
	1.82832	-0.387586	-19.1612
	1.85294	-0.0973833	-4.82351
	1.89296	0.0856973	4.25789
	1.87894	-0.642081	-31.8689
	1.86984	-0.146724	-7.27702
	1.89832	-0.040901	-2.03305
	1.87661	-0.410958	-20.3933
	1.88195	0.0370057	1.83707
	1.90061	-0.0259689	-1.29105
	1.93967	0.005843	0.291372
	1.97839	-0.19217	-9.61204
	1.9153	-0.0928388	-4.62083
	1.98918	-0.132441	-6.63003
	1.98575	0.0779067	3.89892
	1.98153	0.0421994	2.11122
	1.96727	-0.413555	-20.6678
	2.01441	0.0603777	3.02843
	2.00687	-0.626499	-31.4072
	2.03269	-0.564823	-28.3722
	1.98457	-0.519378	-25.9916
	2.03418	-0.0162306	-0.815356
	1.99797	-0.122703	-6.14675
	2.01942	-0.647275	-32.4805
	2.06169	-0.471985	-23.7623
	2.0714	0.275919	13.901
	2.06695	-0.0986818	-4.97007
	2.08027	-0.266181	-13.4202
	2.0618	-0.0980326	-4.93539
	2.09739	-0.533661	-26.9424
	2.05929	-0.240861	-12.1238
	2.10556	0.0532362	2.68927
	2.08898	-0.0415502	-2.09625
	2.12278	0.00194767	0.0985208
	2.10824	0.10842	5.47805
	2.10451	-0.282412	-14.2655
	2.08879	-0.654416	-33.017
	2.09733	-0.0837497	-4.22802
	2.09071	0.356423	17.9837
	2.11856	-0.109719	-5.54824
	2.13832	-0.675191	-34.197
	2.13072	-0.672594	-34.0453
	2.15067	0.333051	16.8833
	2.12942	-0.276569	-13.9975
	2.1654	-0.668699	-33.9398
	2.18671	0.24216	12.3104
	2.1542	-0.253197	-12.8394
	2.16248	-0.255794	-12.9794
0-1h-6
	0.604479	-0.643379	-28.9127	-25.1711
	0.624139	-0.532362	-23.9603
	0.691398	-0.61806	-27.9638
	0.704207	-0.323313	-14.6424
	0.715291	-0.459	-20.8056
	0.670822	-0.468738	-21.1735
	0.690827	-0.824512	-37.3035
	0.693155	-0.644028	-29.1427
	0.735698	-0.370057	-16.8006
	0.729309	-0.294098	-13.3453
	0.710991	-0.621306	-28.1536
	0.764308	-0.447314	-20.3536
	0.753869	-0.370057	-16.8244
	0.77074	-0.297344	-13.5363
	0.754917	-0.303187	-13.7853
	0.78101	-0.827109	-37.685
	0.808003	-0.361617	-16.5102
	0.82318	-0.53431	-24.424
	0.816534	-0.415502	-18.9832
	0.847479	-0.648573	-29.7037
	0.825871	-0.363564	-16.6223
	0.813706	-0.479126	-21.8852
	0.835575	-0.643379	-29.4384
	0.820263	-0.73427	-33.5574
	0.847857	-0.202557	-9.27675
	0.833372	-0.825161	-37.7501
	0.840414	-0.483021	-22.1092
	0.835688	-0.604426	-27.6563
	0.822035	-0.553137	-25.2824
	0.831468	-0.370057	-16.9265
	0.8448	-0.743359	-34.0378
	0.838868	-0.509639	-23.3248
	0.863648	-0.315522	-14.4683
	0.822563	-0.496006	-22.672
	0.839967	-0.739464	-33.8467
	0.872479	-0.571965	-26.2461
	0.864285	-0.66805	-30.6358
	0.890331	-0.479775	-22.0462
	0.898965	-0.560928	-25.7928
	0.919924	-0.627149	-28.8851
	0.923726	-0.45056	-20.7577
	0.898756	-0.414204	-19.0456
	0.94755	-0.614164	-28.348
	0.951674	-0.810879	-37.4404
	0.929947	-0.446665	-20.5882
	0.932908	-0.741412	-34.1827
	0.963049	-0.503147	-23.2517
	0.962072	-0.412905	-19.0798
	0.977613	-0.497953	-23.0378
	0.999884	-0.518729	-24.0407
	0.962699	-0.658311	-30.4217
	0.960089	-0.803088	-37.105
	0.995134	-0.631693	-29.2655
	1.01172	-0.810879	-37.6161
	0.971915	-0.554436	-25.6397
	1.00854	-0.651819	-30.2296
	1.02197	-0.471985	-21.912
	0.993237	-0.448613	-20.7803
	0.999455	-0.585598	-27.139
	1.00828	-0.324611	-15.0539
	0.9885	-0.436277	-20.2014
	0.986419	-0.555085	-25.6988
	0.984236	-0.794648	-36.7842
	1.03706	-0.644028	-29.9347
	0.99443	-0.653767	-30.2866
	1.0482	-0.82646	-38.4482
	1.06101	-0.454456	-21.1625
	1.04834	-0.31747	-14.7688
	1.07106	-0.455105	-21.2093
	1.07554	-0.496006	-23.1236
	1.11266	-0.745307	-34.8473
	1.08618	-0.522624	-24.3848
	1.1193	-0.533661	-24.9642
	1.15603	-0.412905	-19.3705
	1.15397	-0.423942	-19.8851
	1.13428	-0.736867	-34.5108
	1.16669	-0.548593	-25.7577
	1.11841	-0.686877	-32.1296
	1.17427	-0.53431	-25.1019
	1.20777	-0.621306	-29.2655
	1.19636	-0.595337	-28.0173
	1.17157	-0.397324	-18.6621
	1.22118	-0.644028	-30.3675
	1.21666	-0.444717	-20.9618
	1.24615	-0.610918	-28.8624
	1.26158	-0.77647	-36.7284
	1.26792	-0.310977	-14.7165
	1.29196	-0.830355	-39.3706
	1.30895	-0.387586	-18.4008
	1.35543	-0.461597	-21.9942
	1.35736	-0.403816	-19.2438
0-1h-7
	-0.254253	-0.564174	-23.7113	-6.3164
	-0.229125	-0.0538854	-2.26906
	-0.245297	-0.00714144	-0.300339
	-0.219457	-0.192819	-8.12564
	-0.278217	-0.293448	-12.3098
	-0.30647	-0.649871	-27.2022
	-0.334123	-0.346685	-14.4799
	-0.249763	-0.15062	-6.33232
	-0.287565	-0.315522	-13.2262
	-0.2712	-0.702458	-29.4845
	-0.276434	-0.964744	-40.4778
	-0.295118	-0.135038	-5.65717
	-0.324526	-0.0753098	-3.14773
	-0.305358	-0.268778	-11.2511
	-0.259816	-0.748553	-31.4472
	-0.283286	-0.43433	-18.2127
	-0.274711	-0.0805036	-3.37791
	-0.221358	-0.145426	-6.1275
	-0.266598	-0.16685	-7.00546
	-0.294293	-0.0986818	-4.13435
	-0.228216	-0.127248	-5.3587
	-0.2086	-0.114912	-4.84661
	-0.206816	-0.390832	-16.4867
	-0.144973	-0.0863466	-3.65992
	-0.199356	0.0616761	2.60313
	-0.215774	-0.143478	-6.04806
	-0.199879	-0.0214243	-0.904214
	-0.164755	-0.897225	-37.9739
	-0.219246	0.0389533	1.64154
	-0.148822	-0.168149	-7.12513
	-0.107844	-0.14218	-6.04399
	-0.138944	-0.115562	-4.90057
	-0.130574	-0.925791	-39.2876
	-0.11853	-0.392779	-16.6832
	-0.104968	-0.756993	-32.1881
	-0.0900656	-0.473283	-20.1474
	-0.0246993	0.0103876	0.444437
	-0.0309707	0.00649222	0.277636
	-0.0623165	0.05843	2.49262
	-0.00103382	0.0805036	3.45072
	-0.035066	0.38434	16.4304
	0.0531788	-0.0908911	-3.91253
	0.0492114	0.00908911	0.391129
	0.0243943	-0.399921	-17.1769
	0.117576	-0.338245	-14.6338
	0.134416	-1.05109	-45.5365
	0.132389	0.00908911	0.393673
	0.173291	0.0766082	3.32869
	0.166388	-0.145426	-6.31558
	0.168113	0.564823	24.5312
	0.180108	-0.0779067	-3.38695
	0.181503	-0.633641	-27.5513
	0.198357	0.00519378	0.226116
	0.207546	-0.135038	-5.88329
	0.21828	-0.153216	-6.68087
	0.248436	-0.159709	-6.98038
	0.18867	0.196714	8.55755
	0.289393	-0.142829	-6.26257
	0.244694	-0.0616761	-2.69486
	0.332844	-0.238265	-10.4826
	0.263774	-0.389533	-17.046
	0.284371	-0.162306	-7.1138
	0.278797	-0.0603777	-2.64516
	0.254296	0.313574	13.7111
	0.238754	0.356423	15.5658
	0.28109	0.252547	11.0658
	0.259604	0.0370057	1.61879
	0.259039	-0.184379	-8.06531
	0.252408	0.167499	7.32294
	0.28032	-0.27527	-12.0613
	0.25012	-0.220736	-9.649
	0.310555	0.075959	3.33599
	0.298537	-0.320716	-14.0725
	0.294688	0.249301	10.9352
	0.258017	-0.459	-20.0769
	0.292507	-0.0460948	-2.02158
	0.274051	0.29215	12.794
	0.324908	-0.697914	-30.6874
	0.307156	-0.00129844	-0.0570105
	0.335336	-0.25904	-11.3989
	0.303136	0.310328	13.6209
	0.318702	0.168149	7.38946
	0.332508	0.0694668	3.05609
	0.332371	-0.753098	-33.1332
	0.334333	-0.0928388	-4.08494
	0.341245	0.373303	16.4337
	0.351822	-0.360968	-15.9047
	0.343738	0.242809	10.6912
	0.332043	-0.470686	-20.7073
	0.365844	0.136986	6.04215
	0.321169	0.282412	12.4131
	0.371667	-0.799193	-35.2692
	0.357419	0.179185	7.89824
	0.365037	0.0603777	2.66298
	0.398383	0.0246704	1.09093
	0.388409	0.203207	8.97875
	0.362727	0.294747	12.9973
	0.332539	0.182431	8.02574
0-1h-8
	1.65393	0.595337	29.0322	13.9552
	1.68287	0.510938	24.9728
	1.71497	0.744658	36.4867
	1.79232	0.227228	11.2015
	1.82127	0.240861	11.9004
	1.83691	0.201908	9.98802
	1.89151	0.138934	6.90216
	1.87436	0.148672	7.37607
	1.83943	0.244757	12.11
	1.84703	0.0512886	2.53919
	1.84584	-0.0168798	-0.835608
	1.82492	0.346035	17.1015
	1.85376	0.758941	37.5911
	1.85098	0.347983	17.2328
	1.8244	0.110368	5.45442
	1.87224	0.688176	34.1354
	1.91214	-0.199311	-9.91786
	1.8615	0.190222	9.428
	1.89465	0.533661	26.5177
	1.93295	-0.0136337	-0.679515
	1.88604	0.293448	14.5719
	1.91737	0.705705	35.1282
	1.92676	-0.197364	-9.83218
	1.94309	0.497953	24.837
	1.95416	0.0785559	3.92174
	2.00826	0.223982	11.229
	1.95287	-0.205803	-10.2735
	1.97716	0.580405	29.0264
	2.03738	0.266181	13.3748
	2.00297	0.279815	14.0222
	1.92047	0.255794	12.7363
	1.97792	0.468089	23.411
	2.03354	-0.165552	-8.31631
	1.99681	0.681034	34.1109
	1.98928	0.669348	33.5059
	2.05949	-0.0460948	-2.32019
	1.99369	0.581703	29.1288
	2.04724	0.814125	40.9372
	1.93252	-0.268778	-13.3959
	1.94365	-0.115562	-5.76456
	1.92699	0.742061	36.9656
	1.91276	0.544697	27.1043
	1.91946	-0.1253	-6.23854
	1.86732	0.786857	39.015
	1.86583	0.396026	19.6346
	1.93038	-0.148672	-7.40853
	1.88194	0.690123	34.2579
	1.83932	-0.229825	-11.3715
	1.87178	-0.115562	-5.73234
	1.78396	0.248652	12.2496
	1.82676	0.426539	21.083
	1.7984	0.716092	35.3161
	1.73276	0.386936	18.9859
	1.72231	-0.0285658	-1.40055
	1.69811	0.127897	6.25876
	1.66484	-0.113614	-5.54551
	1.6739	0.15062	7.35682
	1.66734	0.671296	32.7704
	1.69551	0.288904	14.1348
	1.62753	0.620007	30.173
	1.64106	0.0636238	3.09969
	1.61716	0.129844	6.31406
	1.58734	0.681683	33.0705
	1.58029	0.286307	13.8824
	1.56105	0.269427	13.0444
	1.54127	0.064273	3.10705
	1.49834	0.127248	6.13077
	1.4531	0.614164	29.4849
	1.41949	0.324611	15.5436
	1.36403	0.498603	23.7716
	1.37911	0.583651	27.8589
	1.35438	0.318119	15.1556
	1.34459	-0.0668699	-3.18343
	1.33219	0.683631	32.5118
	1.35321	0.697914	33.2454
	1.41938	0.468089	22.4134
	1.42048	0.343439	16.4464
	1.4347	0.8349	40.0239
	1.45653	0.318119	15.2768
	1.45139	0.66805	32.0675
	1.46233	0.134389	6.45666
	1.51271	0.0402518	1.94151
	1.51056	-0.0383041	-1.84726
	1.4875	0.443419	21.3452
	1.50599	0.116211	5.60235
	1.59111	0.0564823	2.74107
	1.54557	-0.105823	-5.11742
	1.551	0.081802	3.95742
	1.59748	0.736867	35.7758
	1.59405	0.748553	36.3334
	1.59783	-0.189573	-9.20492
	1.64119	0.482372	23.5002
	1.63918	0.547944	26.6904
	1.63499	0.0843989	4.10988
	1.60677	0.0402518	1.9558
	1.61229	0.253846	12.3392
	1.6361	0.50055	24.3761
	1.68092	0.815423	39.8479
	1.63945	-0.00714144	-0.347882
	1.62978	0.0188274	0.91645
	1.63547	-0.0266181	-1.29625
	1.63899	0.639484	31.1486
	1.59059	0.256443	12.4444
	1.58868	0.210348	10.2061
	1.65273	-0.0869958	-4.24226
	1.6684	0.731673	35.7206
	1.66427	0.140232	6.8443
	1.55343	0.239563	11.5916
	1.61173	0.0798543	3.88153
	1.64531	-0.121405	-5.91678
	1.58076	-0.156463	-7.5871
	1.58658	0.335648	16.2828
	1.61094	0.0214243	1.04133
0-1h-9
	-3.33208	-0.812177	-31.8137	-30.5061
	-3.33448	-1.00045	-39.1812
	-3.33943	-0.647924	-25.3638
	-3.33576	-0.982273	-38.4651
	-3.27063	-0.964095	-37.9599
	-3.28657	-0.47588	-18.7113
	-3.25704	-0.925142	-36.4675
	-3.25717	-0.984221	-38.7961
	-3.2521	-0.416801	-16.4357
	-3.26847	-0.620007	-24.4156
	-3.22604	-0.948514	-37.4861
	-3.23344	-0.934231	-36.8987
	-3.24986	-1.1277	-44.4795
	-3.19119	-0.769328	-30.493
	-3.19792	-1.10563	-43.7992
	-3.203	-0.902419	-35.7332
	-3.21465	-0.78491	-31.0496
	-3.175	-0.299941	-11.9041
	-3.18029	-0.59274	-23.5149
	-3.20689	-1.01863	-40.3221
	-3.18155	-0.664154	-26.3454
	-3.18183	-0.853727	-33.865
	-3.17967	-0.994608	-39.461
	-3.19288	-0.731673	-28.9963
	-3.20412	-0.570017	-22.5683
	-3.2199	-0.711548	-28.1349
	-3.23056	-0.992661	-39.2162
	-3.2184	-0.713495	-28.2155
	-3.17746	-0.771276	-30.6054
	-3.20443	-0.654416	-25.9094
	-3.18616	-1.13874	-45.1554
	-3.22246	-0.887487	-35.0846
	-3.1851	-1.0842	-42.9963
	-3.21567	-0.318119	-12.5826
	-3.19799	-0.724532	-28.701
	-3.1812	-0.971236	-38.5287
	-3.1846	-0.747904	-29.6602
	-3.16036	-0.95176	-37.822
	-3.13252	-0.831004	-33.1001
	-3.15835	-0.745307	-29.6223
	-3.1582	-0.904367	-35.945
	-3.09047	-0.334349	-13.3641
	-3.10218	-0.766082	-30.5917
	-3.12075	-1.07057	-42.6853
	-3.095	-0.861518	-34.4237
	-3.06989	-1.14393	-45.8054
	-3.06913	-1.11471	-44.6381
	-3.0414	-0.641432	-25.7446
	-3.0347	-0.535608	-21.5091
	-3.0336	-0.801789	-32.2022
	-3.00901	-0.64273	-25.8668
	-2.96306	-0.732323	-29.5864
	-2.99548	-0.907613	-36.5693
	-3.01953	-0.507692	-20.4139
	-2.97372	-0.694019	-28.0138
	-2.98468	-0.7927	-31.9679
	-2.99394	-0.763485	-30.7657
	-2.96397	-0.905016	-36.5611
	-2.97385	-0.825811	-33.3335
	-2.9641	-0.756344	-30.5543
	-2.97803	-1.14718	-46.2905
	-2.96721	-0.529116	-21.3689
	-2.94351	-0.848533	-34.3379
	-2.96079	-1.005	-40.6114
	-2.9595	-1.0407	-42.0587
	-2.97295	-0.919299	-37.1102
	-2.94009	-0.692071	-28.014
	-2.94001	-0.879696	-35.6095
	-2.90887	-0.420047	-17.047
	-2.8907	-0.336946	-13.6952
	-2.88087	-0.961498	-39.1145
	-2.92832	-0.821266	-33.2768
	-2.88611	-1.12835	-45.8826
	-2.87727	-0.491461	-19.9983
	-2.80394	-0.789454	-32.3228
	-2.82452	-0.6674	-27.2782
	-2.78363	-0.817371	-33.5229
	-2.82295	-0.910859	-37.2346
	-2.80379	-0.845937	-34.636
	-2.80521	-0.0499901	-2.04641
	-2.80296	-0.797245	-32.6445
	-2.77989	-0.553787	-22.7191
	-2.75074	-0.576509	-23.7092
	-2.73467	-0.557033	-22.9391
	-2.71212	-0.654416	-27.0006
	-2.70683	-0.575211	-23.743
	-2.71638	-0.854376	-35.2387
	-2.68835	-0.707652	-29.2554
	-2.72151	-0.651819	-26.8723
	-2.70869	-0.855675	-35.3151
	-2.66357	-0.595986	-24.6899
	-2.65736	-0.27527	-11.4093
	-2.63169	-0.705705	-29.3137
	-2.681	0.0227228	0.939916
	-2.64912	-1.13419	-47.0452
	-2.60109	-0.936178	-38.9878
	-2.6259	-0.825811	-34.3197
	-2.61518	-0.429136	-17.8498
	-2.64755	-0.679736	-28.1975
	-2.60114	-1.11666	-46.5046
	-2.60916	-0.673893	-28.0452
	-2.65435	-0.223332	-9.25885
	-2.57566	-0.597284	-24.9267
	-2.59277	-0.883591	-36.8233
	-2.59786	-0.370057	-15.4147
0-1h-10
	-3.12128	0.427188	17.0298	1.84217
	-3.11966	0.181133	7.22196
	-3.20887	0.23372	9.24921
	-3.22574	-0.0610269	-2.41172
	-3.27681	0.555085	21.8416
	-3.31356	0.132441	5.19547
	-3.36546	-0.101928	-3.98122
	-3.40888	0.327208	12.7336
	-3.40474	-0.281113	-10.9441
	-3.44218	0.177238	6.87823
	-3.45573	0.0136337	0.528502
	-3.48595	0.186976	7.22957
	-3.44292	0.369407	14.3348
	-3.51518	0.0447963	1.72787
	-3.49248	0.0396026	1.53045
	-3.51011	-0.481074	-18.5645
	-3.49541	-0.379146	-14.6491
	-3.51023	-0.164902	-6.36329
	-3.48625	0.168798	6.52655
	-3.48795	0.14997	5.79775
	-3.52312	0.0694668	2.67766
	-3.51298	-0.575211	-22.1921
	-3.56308	-0.0805036	-3.09275
	-3.50058	0.433031	16.7226
	-3.52401	-0.230474	-8.88339
	-3.57588	-0.488864	-18.7615
	-3.56721	-0.425241	-16.3315
	-3.55601	-0.0331103	-1.27277
	-3.55875	-0.60897	-23.4047
	-3.5991	-0.371355	-14.2239
	-3.57903	0.386287	14.8198
	-3.57051	0.0902419	3.46466
	-3.56602	0.232422	8.92665
	-3.60049	0.305784	11.7103
	-3.58252	-0.0616761	-2.36558
	-3.58383	0.00843989	0.323674
	-3.60239	-0.0973833	-3.72893
	-3.6243	0.282412	10.7937
	-3.60754	-0.406413	-15.5558
	-3.6173	-0.099331	-3.79876
	-3.65207	-0.159709	-6.09008
	-3.65273	0.637536	24.3078
	-3.64163	-0.204505	-7.80512
	-3.65758	0.199311	7.59647
	-3.64088	0.299941	11.4478
	-3.6525	0.0305134	1.16349
	-3.67677	-0.0733621	-2.79167
	-3.67313	-0.111666	-4.25056
	-3.71254	-0.0577808	-2.19216
	-3.71545	0.278516	10.5638
	-3.71365	0.355774	13.4961
	-3.74754	0.203856	7.71134
	-3.7373	0.357721	13.5431
	-3.69999	0.307731	11.687
	-3.71888	0.0383041	1.45245
	-3.70591	0.405115	15.3777
	-3.73016	-0.162306	-6.14875
	-3.7331	-0.210348	-7.96682
	-3.74077	0.0590792	2.23611
	-3.72984	-0.0324611	-1.22977
	-3.72697	0.385638	14.6126
	-3.7601	0.277218	10.4753
	-3.79848	0.368758	13.8895
	-3.76265	0.230474	8.70718
	-3.77065	-0.196714	-7.42703
	-3.79783	0.0941372	3.54602
	-3.77666	0.28371	10.7058
	-3.76528	-0.0331103	-1.25064
	-3.79331	0.0889434	3.35165
	-3.78753	0.28371	10.696
	-3.7804	0.193468	7.29827
	-3.79707	-0.116211	-4.37787
	-3.79537	0.218139	8.21861
	-3.80391	-0.582352	-21.9265
	-3.76272	0.184379	6.96572
	-3.81393	0.151918	5.7148
	-3.83015	-0.210348	-7.9023
	-3.8248	-0.214893	-8.07666
	-3.81928	-0.293448	-11.0343
	-3.82656	0.00714144	0.268363
	-3.81597	0.0850481	3.19878
	-3.80889	0.121405	4.56892
	-3.81366	-0.51743	-19.466
	-3.78369	0.135038	5.09271
	-3.8101	-0.294098	-11.0672
	-3.80409	0.215542	8.11484
	-3.84335	-0.0902419	-3.3864
	-3.79021	-0.130494	-4.91876
	-3.80575	-0.131792	-4.96123
	-3.79646	0.191521	7.21511
	-3.82585	-0.0597284	-2.24464
	-3.81211	-0.189573	-7.13259
	-3.81723	0.361617	13.5992
	-3.85572	-0.138284	-5.18386
	-3.82183	0.164253	6.17472
	-3.83672	0.105823	3.97324
	-3.82757	0.135687	5.09841
	-3.84656	0.260987	9.79083
	-3.81585	0.0928388	3.49184
	-3.829	-0.124001	-4.65885
	-3.80521	0.381093	14.346
	-3.79693	-0.0629746	-2.37238
	-3.82872	-0.29215	-10.9768
	-3.82514	-0.310328	-11.6633
	-3.83471	-0.0811528	-3.04753
	-3.8311	-0.011686	-0.438974
	-3.82934	0.326559	12.2684
	-3.83896	-0.142829	-5.36177
	-3.83672	0.27527	10.3352
	-3.86322	0.353826	13.255
	-3.81531	-0.0506393	-1.90475
	-3.83646	0.153866	5.77716
	-3.87125	0.270076	10.1109
	-3.877	0.206453	7.72531
	-3.84874	0.0454456	1.70459
	-3.8742	0.332402	12.441
	-3.85428	0.388884	14.5792
	-3.86508	-0.323313	-12.1107
	-3.86274	-0.0772574	-2.89444
	-3.88132	0.222683	8.3296
	-3.84301	0.315522	11.8402
	-3.88799	0.5012	18.7368
	-3.88536	0.195416	7.3072
0-1h-11
	5.74059	0.070116	3.06954	7.80588
	5.70649	-0.332402	-14.5134
	5.73907	-0.14153	-6.19527
	5.72788	0.13374	5.849
	5.69853	0.360318	15.7216
	5.69034	0.160358	6.99245
	5.63627	0.497304	21.5926
	5.61426	0.178536	7.73872
	5.58942	0.55898	24.1813
	5.54682	0.179185	7.72581
	5.52102	0.289553	12.4591
	5.49197	0.343439	14.744
	5.42798	0.00389533	0.166394
	5.39668	0.684929	29.1843
	5.3923	-0.335648	-14.2979
	5.38356	0.40057	17.0508
	5.34345	0.225929	9.58684
	5.30424	0.249951	10.5735
	5.29725	-0.357072	-15.0974
	5.28453	-0.00389533	-0.16453
	5.27213	0.412256	17.3953
	5.2759	-0.0447963	-1.89082
	5.22206	-0.0538854	-2.26487
	5.25928	0.2084	8.78478
	5.24318	0.308381	12.9828
	5.25374	0.497953	20.9808
	5.28385	-0.0590792	-2.49525
	5.24873	0.0506393	2.13288
	5.2437	-0.0882942	-3.71744
	5.24033	0.29215	12.2967
	5.22092	0.346685	14.5698
	5.24146	0.2506	10.5488
	5.2242	0.203856	8.56959
	5.21868	0.15841	6.65629
	5.21881	-0.195416	-8.21157
	5.23341	0.322663	13.5736
	5.18483	0.148023	6.20333
	5.17907	0.403816	16.9151
	5.17126	-0.129195	-5.40863
	5.18363	0.441471	18.4989
	5.18429	-0.321365	-13.4676
	5.17508	0.453157	18.9758
	5.16599	-0.229175	-9.59031
	5.15433	0.278516	11.644
	5.13872	0.263584	11.0062
	5.08896	0.320067	13.3125
	5.11433	-0.0253197	-1.05525
	5.12875	0.0616761	2.57337
	5.08937	0.314224	13.0699
	5.11521	0.614813	25.624
	5.08216	0.294098	12.2259
	5.06483	0.184379	7.65442
	5.04688	0.516781	21.4232
	5.04626	0.536258	22.2295
	5.00028	0.0266181	1.09946
	5.00474	0.369407	15.2633
	4.96507	-0.260338	-10.7238
	4.96304	0.246055	10.1335
	4.95916	0.0396026	1.63051
	4.90838	0.246704	10.1167
	4.90003	0.14153	5.80001
	4.89508	0.315522	12.9251
	4.87326	0.455754	18.6375
	4.82768	0.60962	24.8402
	4.83348	0.129195	5.26692
	4.82789	0.568719	23.1741
	4.78205	-0.0746606	-3.03148
	4.73372	0.468089	18.9332
	4.74363	0.578457	23.4154
	4.67969	0.237615	9.5705
	4.66199	0.0376549	1.51456
	4.6524	0.321365	12.9159
	4.60856	0.24216	9.69922
	4.58885	0.157112	6.28311
	4.58361	-0.0564823	-2.25791
	4.55029	-0.152567	-6.08304
	4.53107	0.57586	22.9243
	4.5323	0.20905	8.32309
	4.52541	0.283061	11.2636
	4.49562	0.148672	5.9022
	4.44816	0.368109	14.5591
	4.42931	-0.144127	-5.69218
	4.44586	0.461597	18.2532
	4.39183	0.0960849	3.78357
	4.37126	0.478477	18.8102
	4.34385	0.163604	6.41802
	4.34128	0.626499	24.5711
	4.34525	0.541451	21.2423
	4.31058	0.30059	11.7609
	4.31586	0.169447	6.63264
	4.28771	0.0305134	1.19176
	4.2859	-0.0162306	-0.633828
	4.24479	0.472634	18.3968
	4.21234	0.149321	5.79752
	4.19741	0.301888	11.7072
	4.21099	0.101928	3.95704
	4.15504	0.524572	20.2749
	4.18324	0.186327	7.21778
	4.17904	0.607023	23.5058
	4.14119	0.127897	4.93805
	4.09163	-0.0694668	-2.67171
	4.09659	0.170745	6.56932
	4.04513	0.199311	7.63743
	4.05635	0.216191	8.29155
	4.037	-0.00973833	-0.372933
	4.00971	0.0110368	0.421752
	3.95213	-0.0266181	-1.01258
	3.97085	0.323313	12.3169
	3.94295	0.0707652	2.69001
	3.96067	-0.0532362	-2.02652
	3.91508	0.0694668	2.63488
	3.90553	0.0785559	2.9774
	3.90245	-0.210348	-7.97079
	3.88374	-0.0766082	-2.89865
	3.81242	0.0454456	1.70992
	3.89692	0.0714144	2.7049
	3.82829	0.240861	9.0737
	3.8046	0.390832	14.6959
	3.79402	0.0999802	3.75636
	3.78848	0.117509	4.41301
	3.77478	0.246055	9.23049
0.5-1h-1
	2.03609	-0.48432	-13.0971	-13.0032
	2.02073	-0.444068	-11.9939
	2.00924	-0.405115	-10.9317
	1.99838	-0.890733	-24.0157
	2.05897	-0.501849	-13.596
	2.09438	-0.426539	-11.5884
	2.13143	-1.11991	-30.5183
	2.19003	-0.455754	-12.4773
	2.23827	-0.81802	-22.4823
	2.2794	-0.342789	-9.45182
	2.33629	-0.73427	-20.3392
	2.34613	-0.55898	-15.4956
	2.39464	-0.839444	-23.3614
	2.41667	-0.80114	-22.3347
	2.40382	-0.520676	-14.5005
	2.44994	-0.837497	-23.4105
	2.43381	-0.36746	-10.258
	2.46489	-0.399921	-11.192
	2.47296	-0.686228	-19.2172
	2.50728	-0.264883	-7.43795
	2.51271	-0.275919	-7.75121
	2.52519	-0.727129	-20.4479
	2.58374	-0.521325	-14.7289
	2.59278	-0.712197	-20.1365
	2.57311	-0.538205	-15.193
	2.66738	-0.215542	-6.1304
	2.63141	-0.384989	-10.9185
	2.68621	-0.476529	-13.574
	2.68291	-0.930985	-26.5133
	2.74765	-0.338894	-9.70092
	2.64707	-0.296045	-8.40644
	2.70453	-0.273323	-7.79696
	2.73875	-0.557682	-15.9527
	2.76666	-0.880995	-25.2581
	2.78105	-0.361617	-10.3791
	2.7841	-0.248003	-7.11981
	2.81235	-0.477828	-13.749
	2.82024	-0.272673	-7.85072
	2.80106	-0.366811	-10.545
	2.79294	-0.0246704	-0.70874
	2.82724	-0.252547	-7.27532
	2.84275	-0.746606	-21.5356
	2.87377	-0.399272	-11.5451
	2.83931	-0.521325	-15.033
	2.85804	-0.728427	-21.0369
	2.85056	-0.0843989	-2.43585
	2.86002	-0.463545	-13.389
	2.88203	-0.107771	-3.11824
	2.85844	-0.732972	-21.1688
	2.84993	-0.0928388	-2.6793
	2.85835	-0.309679	-8.94342
	2.86112	-0.15841	-4.57578
	2.84605	-0.475231	-13.7112
	2.86436	-0.549891	-15.8886
	2.8653	-0.647924	-18.7227
	2.89191	-0.212296	-6.14746
	2.87804	-0.186976	-5.40826
	2.90233	-0.923843	-26.7756
	2.89669	-0.280464	-8.12455
	2.86021	-0.281762	-8.13838
	2.88562	-0.623903	-18.0579
	2.91386	-0.414204	-12.0154
	2.88073	-0.138284	-4.00069
	2.90586	-0.246704	-7.15181
	2.90343	-0.560928	-16.2582
	2.90575	-0.188274	-5.45788
	2.8995	-0.314224	-9.10459
	2.90642	-0.526519	-15.2645
	2.92267	-0.71804	-20.8444
	2.88375	-0.368109	-10.6525
	2.90267	-0.378497	-10.9697
	2.90964	-0.410958	-11.9172
	2.91444	-0.44277	-12.8447
	2.93739	-0.390183	-11.3399
	2.90378	-0.374601	-10.8578
	2.8835	-0.701809	-20.3094
	2.90834	-0.301888	-8.75334
	2.91955	-0.216191	-6.2741
	2.92215	-0.233071	-6.7654
	2.93955	-0.647275	-18.8154
	2.94522	-0.481723	-14.0092
	2.93624	-0.516781	-15.0179
	2.9361	-0.228526	-6.64087
	2.98331	-0.671296	-19.582
	2.9949	-0.476529	-13.9133
	2.99232	-0.529116	-15.4455
	2.98331	-0.230474	-6.72281
	2.98888	-0.644678	-18.8139
	2.99832	-0.320067	-9.34747
	3.02276	-0.611567	-17.896
	3.01616	-0.297993	-8.71521
	3.04014	-0.544697	-15.9613
	3.03924	-0.203856	-5.97301
	3.06689	-0.132441	-3.88911
	3.0459	-0.585598	-17.1678
	3.06066	-0.423942	-12.4431
	3.07039	-0.508341	-14.932
	3.06207	-0.163604	-4.80237
	3.06575	-0.319417	-9.37892
	3.0435	-0.994608	-29.1539
	3.06895	-0.386936	-11.3644
	3.04685	-0.333051	-9.76449
	3.03671	-0.303836	-8.90071
	3.0552	-0.418099	-12.2662
	3.07641	-0.324611	-9.53956
	3.0636	-0.0214243	-0.62895
	3.04745	-0.331753	-9.7269
	3.04997	-0.971236	-28.4835
0.5-1h-2
	1.45496	-0.925791	-23.8997	0.0494793
	1.52654	0.00973833	0.252823
	1.53704	-0.505744	-13.1415
	1.58721	-0.137635	-3.59065
	1.56978	-0.786208	-20.4832
	1.62773	-0.390832	-10.2294
	1.61974	-0.0129844	-0.339618
	1.62935	-0.808931	-21.1759
	1.67656	-0.371355	-9.75763
	1.72095	-0.046744	-1.23257
	1.7429	-0.0318119	-0.840304
	1.76598	-0.448613	-11.8723
	1.82569	-0.166201	-4.41937
	1.86286	0.0986818	2.63175
	1.88609	-0.729077	-19.4813
	1.91451	-0.336297	-9.00616
	1.91891	-0.165552	-4.43505
	1.94226	-0.107771	-2.89251
	1.9425	-0.112965	-3.03197
	1.94136	-0.179185	-4.8089
	1.93857	-0.0460948	-1.23678
	1.97212	-0.173992	-4.68103
	1.94285	-0.419398	-11.2572
	1.91248	-0.336946	-9.02208
	1.89108	-0.0129844	-0.347067
	1.93948	0.125949	3.37958
	1.91085	0.3337	8.93352
	1.88713	-0.100629	-2.68894
	1.8746	-0.00259689	-0.0693223
	1.88014	-0.326559	-8.72137
	1.86556	-0.316171	-8.43409
	1.83515	-0.353826	-9.41567
	1.8458	-0.0168798	-0.449559
	1.80278	0.477178	12.6645
	1.80766	0.560279	14.8758
	1.77301	-0.151918	-4.02259
	1.78441	0.263584	6.98549
	1.76376	-0.0305134	-0.80735
	1.72638	0.220086	5.80573
	1.75453	-0.0434979	-1.15006
	1.6995	-0.134389	-3.53759
	1.71748	0.263584	6.94821
	1.71539	-0.449911	-11.8586
	1.68111	0.225929	5.93833
	1.65269	0.343439	9.00639
	1.6876	0.380444	10.0047
	1.69599	-0.214893	-5.65518
	1.66051	0.388884	10.2045
	1.68102	0.307731	8.0883
	1.68675	-0.3759	-9.8851
	1.67722	0.0266181	0.699425
	1.6932	0.468089	12.3149
	1.69769	0.0999802	2.6314
	1.68845	0.290202	7.63212
	1.67943	0.338245	8.88917
	1.6865	0.299291	7.86992
	1.65213	0.299291	7.84832
	1.63004	0.383041	10.0267
	1.65684	0.483671	12.6879
	1.66178	0.560928	14.7203
	1.61131	0.460299	12.031
	1.63933	-0.0142829	-0.374167
	1.58884	0.539504	14.0758
	1.60263	0.510938	13.3452
	1.59556	-0.0908911	-2.37276
	1.57482	0.182431	4.75446
	1.5912	-0.00649222	-0.169423
	1.57833	0.0720637	1.87865
	1.55836	0.547294	14.2442
	1.55677	0.529116	13.7694
	1.52328	0.39213	10.1774
	1.53523	0.0272673	0.708395
	1.52797	0.155813	4.04558
	1.54788	0.348632	9.06627
	1.5284	-0.0486917	-1.26431
	1.52609	0.087645	2.27531
	1.50367	0.620656	16.083
	1.51195	0.181782	4.71379
	1.47713	0.11686	3.02189
	1.4724	0.0421994	1.09083
	1.46003	0.223982	5.784
	1.43579	0.415502	10.7088
	1.4208	0.273972	7.05273
	1.43363	-0.0850481	-2.19166
	1.43918	0.173992	4.48561
	1.38286	0.052587	1.34964
	1.3378	-0.0240212	-0.61429
	1.33555	-0.130494	-3.33653
	1.26518	-0.181133	-4.60532
	1.22908	0.0454456	1.15211
	1.22973	-0.023372	-0.592546
	1.2391	0.335648	8.51575
	1.25597	-0.16685	-4.23905
	1.26671	-0.0947864	-2.41023
	1.26549	-0.222683	-5.66189
	1.31361	-0.32591	-8.31854
	1.34	0.227877	5.82837
	1.36416	0.178536	4.57523
	1.35969	0.0837497	2.14545
	1.37749	0.298642	7.6612
	1.3941	-0.376549	-9.67315
	1.39908	-0.110368	-2.83631
	1.41394	0.3337	8.58552
	1.40276	0.0253197	0.650866
	1.43076	0.136337	3.51249
	1.43773	0.0240212	0.619216
	1.42213	0.193468	4.98091
	1.41362	0.099331	2.5556
	1.43732	-0.156463	-4.03321
	1.42369	-0.0779067	-2.00603
	1.42573	-0.377847	-9.73107
	1.42889	-0.0882942	-2.27445
	1.41287	-0.161007	-4.14224
	1.40428	-0.0162306	-0.417274
	1.37945	0.00843989	0.216551
	1.34282	-0.449262	-11.4939
	1.35831	0.00389533	0.0997779
	1.3696	-0.299941	-7.69004
	1.39356	-0.0246704	-0.633711
	1.38984	-0.251898	-6.46873
	1.35093	-0.312925	-8.01097
	1.37693	-0.273972	-7.02834
	1.35266	0.00194767	0.0498666
	1.34716	-0.14153	-3.62207
	1.31275	-0.0136337	-0.347954
	1.33625	-0.353826	-9.04745
	1.29732	-0.0954357	-2.43269
	1.32128	-0.323313	-8.25731
	1.34785	0.194767	4.98466
	1.32921	-0.0480424	-1.22774
0.5-1h-3
	1.14384	-0.602478	-15.1707	-7.26667
	1.13165	-0.696615	-17.5241
	1.09324	-0.54275	-13.6114
	1.11401	-0.825161	-20.7288
	1.12739	-0.574562	-14.4487
	1.14878	-0.194767	-4.9061
	1.17167	-0.924492	-23.3316
	1.21129	-0.821915	-20.8085
	1.19388	-0.372654	-9.42104
	1.28171	-0.466142	-11.8676
	1.30426	-0.152567	-3.89116
	1.27443	-0.882942	-22.4668
	1.34775	-0.687526	-17.5969
	1.34897	-0.983572	-25.1771
	1.44148	-0.477178	-12.3048
	1.453	-0.0954357	-2.46316
	1.46806	-0.029215	-0.754933
	1.48318	-0.296045	-7.6594
	1.50418	-0.335648	-8.69864
	1.51578	-0.136986	-3.55336
	1.52495	-0.472634	-12.2693
	1.56605	-0.327208	-8.52196
	1.5555	-0.824512	-21.4567
	1.57087	-0.640782	-16.6957
	1.5893	-0.178536	-4.65847
	1.601	-0.324611	-8.47798
	1.61272	-0.539504	-14.1039
	1.64461	-0.378497	-9.91992
	1.60265	-0.0246704	-0.644395
	1.62759	-0.688825	-18.0291
	1.61084	-0.31682	-8.28101
	1.61958	-0.354475	-9.27174
	1.60674	0.0610269	1.59454
	1.54926	-0.318768	-8.291
	1.58738	0.19996	5.21652
	1.541	-0.0396026	-1.02934
	1.51451	-0.0947864	-2.45846
	1.49193	-0.882942	-22.8609
	1.49309	-0.0123352	-0.319387
	1.46714	0.201259	5.20017
	1.4337	-0.0954357	-2.45936
	1.36966	-0.0447963	-1.14849
	1.33545	0.169447	4.33236
	1.32356	-0.0746606	-1.90712
	1.27949	0.34214	8.70854
	1.20561	-0.171395	-4.33702
	1.21393	0.192819	4.88225
	1.17493	0.287605	7.25953
	1.10391	0.0681683	1.71094
	1.07671	-0.376549	-9.43074
	1.01904	0.100629	2.50858
	1.00413	-0.104525	-2.60264
	0.926435	0.614164	15.1969
	0.92531	-0.0454456	-1.12447
	0.846657	0.0850481	2.09114
	0.872376	0.188924	4.65475
	0.820341	-0.0259689	-0.637181
	0.768979	-0.130494	-3.18875
	0.727937	-0.332402	-8.09608
	0.711564	-0.0311627	-0.757997
	0.698672	-0.234369	-5.69497
	0.661806	0.348632	8.44614
	0.639797	0.0415502	1.00487
	0.558528	-0.00519378	-0.124796
	0.55711	0.064273	1.54417
	0.554391	-0.35058	-8.42117
	0.511887	-0.319417	-7.64656
	0.471212	-0.271375	-6.47536
	0.447851	-0.430434	-10.2517
	0.446907	-0.220086	-5.24132
	0.423106	-0.55119	-13.1019
	0.405755	-0.555734	-13.1916
	0.374515	0.0545347	1.29121
	0.325929	0.219437	5.17537
	0.325807	-0.173992	-4.10365
	0.289725	-0.0123352	-0.290087
	0.299257	-0.140881	-3.31566
	0.258308	0.0473932	1.11175
	0.27177	0.0551839	1.29589
	0.215474	-0.903717	-21.1284
	0.205173	-0.368109	-8.59875
	0.188472	-0.168149	-3.92253
	0.16453	-0.370706	-8.63132
	0.128829	-0.602478	-13.988
	0.121365	-0.252547	-5.85985
	0.121021	-0.26683	-6.1911
	0.101827	-0.655714	-15.1913
	0.0674741	-0.289553	-6.68963
	0.0632716	-0.599232	-13.8399
	0.00722364	-0.0837497	-1.92556
	0.0277611	-0.664154	-15.296
	-0.011261	-0.214243	-4.91863
	-0.0339442	-0.637536	-14.6106
	-0.0574571	-0.0869958	-1.98988
	-0.0637402	-0.329156	-7.52525
	-0.0631144	-0.755695	-17.2783
	-0.0763676	-0.656364	-14.9912
	-0.121286	0.152567	3.47188
	-0.144035	0.00908911	0.206462
	-0.172536	-0.437576	-9.91741
	-0.14667	-0.496006	-11.265
	-0.137558	-0.222034	-5.04628
	-0.184492	-0.505095	-11.4368
	-0.132848	-0.557033	-12.6651
	-0.186564	0.475231	10.758
	-0.154686	-0.658311	-14.9418
	-0.202028	-0.276569	-6.25343
	-0.179122	-0.721286	-16.3393
	-0.216946	-0.379146	-8.56263
	-0.244567	-0.448613	-10.1092
	-0.232811	-0.514184	-11.5977
	-0.279835	-0.0831004	-1.86728
	-0.26354	-0.599232	-13.483
	-0.255439	-0.648573	-14.6027
	-0.280366	-0.386936	-8.69436
	-0.296804	0.145426	3.26326
	-0.294117	-0.371355	-8.33508
	-0.298784	-0.832952	-18.6894
	-0.34021	-0.763485	-17.0739
	-0.367061	-0.0947864	-2.11506
	-0.405594	-0.41745	-9.28657
	-0.399869	-0.131143	-2.91867
	-0.427432	-0.805036	-17.8781
	-0.419797	-0.136337	-3.02943
	-0.441845	-0.619358	-13.7385
	-0.435391	-0.279815	-6.20987
	-0.468463	-0.429136	-9.49867
	-0.496375	-0.599232	-13.2343
	-0.448049	-0.545347	-12.0908
	-0.499176	-0.0155813	-0.344026
	-0.505059	-0.476529	-10.5169
	-0.540059	-0.1253	-2.75754
	-0.505069	-0.828408	-18.2833
	-0.523545	-0.235668	-5.19337
	-0.595963	-0.590792	-12.9444
	-0.493531	-0.518729	-11.4589
	-0.515337	-1.27312	-28.0762
	-0.603482	-0.257092	-5.6294
	-0.570798	-0.162306	-3.56319
	-0.474462	-0.372004	-8.2301
	-0.525295	0.0740113	1.6307
	-0.539879	-0.760888	-16.7464
0.5-1h-4
	Origin(1)mV	Origin-X(1)uV	J（pmol·cm-2·s-1）
	-0.194193	0.291501	20.5306	-0.905591
	-0.202751	-0.512236	-36.0544
	-0.190616	-0.138284	-9.74259
	-0.189988	0.14218	10.0174
	-0.138926	0.163604	11.5747
	-0.132432	0.187625	13.2811
	-0.0949178	-0.0720637	-5.11674
	-0.139169	-0.0538854	-3.81229
	-0.107793	0.366161	25.9705
	-0.0766156	0.195416	13.8955
	-0.0404124	-0.19217	-13.7054
	0.0194998	0.346685	24.8448
	0.0214695	0.292799	20.9865
	0.0291563	-0.134389	-9.63876
	0.0853407	0.341491	24.6038
	0.0918121	0.299291	21.5748
	0.180289	0.112965	8.20211
	0.23615	0.0220736	1.61001
	0.264672	0.193468	14.1438
	0.305577	0.215542	15.81
	0.32631	0.179835	13.2131
	0.295126	0.0623253	4.56773
	0.291278	0.222034	16.2672
	0.10032	0.169447	12.2234
	0.00660493	-0.0324611	-2.32392
	-0.0562248	0.312276	22.2417
	-0.136474	0.207102	14.655
	-0.199119	0.0675191	4.75359
	-0.321225	-0.0499901	-3.48477
	-0.382175	-0.347983	-24.1384
	-0.478676	-0.0246704	-1.69789
	-0.538496	-0.0779067	-5.3358
	-0.610392	-0.00519378	-0.353646
	-0.809179	-0.197364	-13.2235
	-0.8762	-0.149321	-9.9502
	-0.948431	-0.447314	-29.6336
	-1.00889	-0.122054	-8.046
	-1.23079	-0.491461	-31.82
	-1.36418	-0.447963	-28.6909
	-1.57707	-0.372004	-23.4172
	-1.67126	-0.285658	-17.8446
	-1.69244	-0.338245	-21.0934
	-3.58105	-0.39213	-20.9751
	-3.73264	-0.657013	-34.7143
0.5-1h-5
	Origin(1)mV	Origin-X(1)uV	#VALUE!
	-1.89812	0.102577	6.29059	-4.06995
	-1.74076	0.017529	1.08882
	-1.72169	-0.422644	-26.2942
	-1.74177	-0.0571316	-3.54847
	-1.69226	-0.514184	-32.0661
	-1.65164	0.15062	9.42367
	-1.66687	-0.115562	-7.22145
	-1.67023	0.142829	8.92274
	-1.69066	-0.348632	-21.7443
	-1.66354	0.0558331	3.4899
	-1.69357	0.290852	18.1353
	-1.66307	0.308381	19.276
	-1.71319	0.142829	8.89165
	-1.72646	0.185028	11.5062
	-1.73889	-0.011686	-0.725989
	-1.76504	0.0376549	2.33433
	-1.78314	0.303836	18.8075
	-1.7683	-0.0499901	-3.09822
	-1.81753	0.414853	25.6076
	-1.81872	-0.175939	-10.8596
	-1.8205	0.381093	23.5181
	-1.82906	-0.0889434	-5.48528
	-1.84884	0.193468	11.9121
	-1.82542	0.0266181	1.64205
	-1.86814	-0.00519378	-0.319291
	-1.86623	-0.305784	-18.8017
	-1.86885	-0.397324	-24.4251
	-1.87325	-0.0967341	-5.94437
	-1.89913	-0.0480424	-2.94602
	-1.94967	-0.0577808	-3.52868
	-1.9093	-0.264883	-16.2298
	-1.89597	0.2084	12.7824
	-1.93121	-0.296695	-18.1467
	-1.91455	-0.121405	-7.43544
	-1.94249	-0.149321	-9.12443
	-1.92546	-0.355125	-21.7307
	-1.96692	-0.0772574	-4.71151
	-1.94074	-0.181782	-11.1096
	-1.96927	-0.0590792	-3.60223
	-1.98214	-0.499901	-30.4496
	-1.95028	0.00908911	0.555042
	-1.98685	-0.142829	-8.69632
	-1.95288	0.101279	6.18342
	-1.96733	0.178536	10.8874
	-1.93717	0.201259	12.3031
	-1.99433	-0.270726	-16.4737
	-2.0077	0.116211	7.06353
	-2.00015	-0.0921896	-5.607
	-1.97931	-0.155813	-9.4927
	-2.02675	-0.248652	-15.0906
	-1.99843	-0.19217	-11.6896
	-1.99261	-0.0863466	-5.25484
	-2.01441	-0.0895927	-5.44274
	-2.02262	-0.20905	-12.6914
	-2.06445	-0.0519378	-3.1424
	-2.05654	-0.164902	-9.98359
	-2.03886	0.0519378	3.14891
	-2.01658	-0.316171	-19.2043
	-2.03852	0.127248	7.71503
	-2.03195	-0.0519378	-3.15071
	-2.02184	-0.00779067	-0.472993
	-2.09371	-0.138284	-8.34681
	-2.06519	0.00389533	0.235664
	-2.06133	0.0746606	4.5183
	-2.1176	-0.0694668	-4.18485
	-2.10068	-0.122054	-7.36299
	-2.09861	-0.334349	-20.1736
	-2.13807	-0.0902419	-5.42737
	-2.1612	0.399921	24.0061
	-2.19204	-0.143478	-8.5914
	-2.18375	-0.140232	-8.40269
	-2.15667	0.114912	6.90054
	-2.18326	-0.237615	-14.2386
	-2.166	0.15841	9.50538
	-2.17034	-0.105823	-6.3478
	-2.20667	-0.156463	-9.35782
	-2.22108	-0.527168	-31.4932
	-2.1908	-0.413555	-24.7665
	-2.18038	0.0649222	3.89113
	-2.17474	-0.2506	-15.0271
	-2.19954	0.130494	7.80899
	-2.1567	-0.0753098	-4.52246
	-2.21176	0.218788	13.0796
	-2.25374	0.381093	22.7046
	-2.27354	0.0506393	3.0122
	-2.28344	-0.0779067	-4.63048
	-2.31949	-0.146724	-8.69527
	-2.29113	-0.282412	-16.7753
	-2.32034	-0.669997	-39.7048
	-2.34	0.0402518	2.38142
	-2.34363	0.502498	29.7195
	-2.3392	-0.606374	-35.8792
	-2.32311	0.0707652	4.19243
	-2.3459	-0.181782	-10.7498
	-2.35577	-0.0155813	-0.920663
	-2.34838	-0.189573	-11.2083
	-2.37447	-0.140881	-8.31178
	-2.36199	0.005843	0.345074
	-2.39232	-0.248003	-14.6107
	-2.36643	-0.207102	-12.2268
	-2.38368	-0.352528	-20.7834
	-2.39831	0.115562	6.80466
	-2.43207	-0.299941	-17.6137
	-2.43672	0.21684	12.7283
	-2.45231	-0.287605	-16.8615
	-2.42895	-0.132441	-7.77931
	-2.46179	-0.104525	-6.12321
	-2.45157	0.237615	13.931
	-2.47613	-0.166201	-9.72498
	-2.4894	0.168149	9.82809
	-2.48537	0.183081	10.7043
	-2.53123	-0.101279	-5.89967
	-2.55233	0.0947864	5.51192
	-2.55783	0.256443	14.9056
	-2.58328	-0.340192	-19.7335
	-2.55676	0.0318119	1.84924
	-2.57222	-0.00259689	-0.150769
	-2.58597	-0.40901	-23.7204
	-2.52532	-0.393429	-22.9295
	-2.46975	-0.310328	-18.168
	-2.46074	-0.070116	-4.10782
	-2.4261	-0.159709	-9.38317
	-2.44478	0.227228	13.3294
	-2.46446	0.422644	24.7526
	-2.46638	-0.18373	-10.7592
	-2.50415	-0.0473932	-2.7668
	-2.51347	-0.285009	-16.6265
	-2.52685	-0.368758	-21.4889
	-2.5107	-0.49211	-28.715
	-2.5304	0.0688176	4.00896
0.5-1h-6
	Origin(1)mV	Origin-X(1)uV	#VALUE!
	-4.60612	-0.596635	-29.3642	-25.043
	-4.57469	-0.537556	-26.5241
	-4.57959	-0.534959	-26.3854
	-4.72952	-0.769978	-37.518
	-4.72443	-0.575211	-28.0389
	-4.74463	-0.600531	-29.2252
	-4.73514	-0.855675	-41.6749
	-4.75057	-0.623253	-30.3164
	-4.74564	-0.421345	-20.503
	-4.82236	-0.374601	-18.1151
	-4.77223	-0.650521	-31.5872
	-4.82231	-0.651819	-31.5217
	-4.85589	0.149321	7.20096
	-4.82538	-0.666751	-32.2358
	-4.86844	-0.651819	-31.4038
	-4.85385	-0.431733	-20.8246
	-4.87455	-0.829706	-39.9549
	-4.85237	-0.515482	-24.8674
	-4.87396	-0.55054	-26.5122
	-4.94339	-0.903717	-43.2765
	-4.92549	-0.679736	-32.5974
	-4.92939	-0.774522	-37.1315
	-4.99792	-0.612866	-29.218
	-4.98816	-0.543399	-25.9266
	-5.00917	-0.38369	-18.2751
	-5.01238	-0.597284	-28.4417
	-5.04794	-0.286307	-13.5938
	-5.07545	-0.710898	-33.679
	-5.05302	-0.669348	-31.7683
	-5.06275	-0.684929	-32.4822
	-5.04717	-0.514184	-24.4153
	-5.04698	-0.3759	-17.8492
	-5.05403	-0.626499	-29.7321
	-5.06911	-0.887487	-42.0673
	-5.08149	-0.748553	-35.4457
	-5.08672	-0.772574	-36.5676
	-5.09935	-1.00435	-47.4903
	-5.10126	-0.815423	-38.5504
	-5.10491	-0.980326	-46.3333
	-5.05549	-0.433031	-20.5478
	-5.08947	-0.580405	-27.4653
	-5.0601	-0.217489	-10.3161
	-5.08267	-0.632992	-29.9704
	-5.11374	-0.303187	-14.3185
	-5.10383	-0.436927	-20.6514
	-5.08441	-0.697265	-33.0091
	-5.09812	-0.597284	-28.2442
	-5.11745	-0.351229	-16.5824
	-5.07081	-0.594038	-28.1531
	-5.09638	-0.613515	-29.0159
	-5.07859	-0.533011	-25.2448
	-5.09287	-0.390183	-18.4584
	-5.04284	-0.396675	-18.842
	-5.05827	-0.406413	-19.2804
	-5.08049	-0.831004	-39.3534
	-5.06767	-0.594688	-28.1911
	-5.11009	-0.41745	-19.7208
	-5.06859	-0.307731	-14.5865
	-5.11993	-0.290202	-13.6984
	-5.13391	-0.53431	-25.1928
	-5.16874	-0.816072	-38.3701
	-5.18579	-0.170096	-7.98608
	-5.25229	-0.384989	-17.9783
	-5.29636	-0.448613	-20.8747
	-5.28426	-0.503796	-23.4656
	-5.27609	-0.756993	-35.283
	-5.30943	-0.520027	-24.1721
	-5.3282	-0.290852	-13.4987
	-5.33764	-0.594038	-27.5493
	-5.29946	-0.84334	-39.2333
	-5.33879	-0.626499	-29.0521
	-5.29112	-0.613515	-28.5604
	-5.33719	-0.314873	-14.6029
	-5.08303	-0.454456	-21.5163
	-5.09379	-0.0960849	-4.54505
	-5.20721	-0.539504	-25.2867
	-5.20545	-0.814774	-38.195
	-5.16725	-0.106472	-5.00642
	-5.22039	-0.860869	-40.307
	-5.1944	-0.545347	-25.5872
	-5.23716	-0.0486917	-2.27655
	-5.23666	-0.186976	-8.74241
	-5.30982	-0.471335	-21.908
	-5.3003	-0.570666	-26.5458
	-5.34063	-0.222034	-10.2943
	-5.3467	-0.498603	-23.1062
	-5.35818	-0.714794	-33.0946
	-5.35347	-0.762187	-35.3025
	-5.42074	-0.473932	-21.8311
	-5.42408	-0.532362	-24.5161
	-5.41147	-0.593389	-27.3546
	-5.43709	-0.652468	-30.0157
	-5.44185	-0.307731	-14.1508
	-5.48794	-0.481074	-22.0394
	-5.48075	-0.818669	-37.5286
	-5.45337	-0.683631	-31.4078
	-5.48571	-0.0227228	-1.04115
	-5.47823	-0.451209	-20.6875
	-5.51323	-0.711548	-32.5319
	-5.51736	-0.125949	-5.75616
	-5.50209	-0.347983	-15.9237
	-5.4829	-0.486917	-22.3163
	-5.58	-0.460948	-20.96
	-5.51795	-0.136337	-6.23062
	-5.54745	-0.477828	-21.7851
	-5.51495	-0.413555	-18.9046
	-5.5262	-0.441471	-20.1623
	-5.5336	-0.48432	-22.106
0.5-1h-7
	-5.77136	-0.812826	-36.3913	-35.2446
	-5.77078	-0.921246	-41.2477
	-5.80551	-0.595986	-26.6087
	-5.79853	-0.770627	-34.4258
	-5.82242	-0.877748	-39.1354
	-5.85811	-0.780365	-34.6925
	-5.80559	-0.986169	-44.03
	-5.73795	-0.754396	-33.8669
	-5.77111	-1.0024	-44.8803
	-5.76615	-0.565473	-25.3272
	-5.77478	-0.758292	-33.9401
	-5.99053	-0.935529	-41.146
	-6.01889	-1.1303	-49.5987
	-6.02101	-0.691422	-30.334
	-5.97889	-0.536258	-23.607
	-5.98781	-0.89333	-39.2985
	-6.01185	-0.927089	-40.7042
	-6.04529	-0.761538	-33.3444
	-6.09051	-0.846586	-36.9326
	-6.06266	-0.568069	-24.8378
	-6.10114	-0.902419	-39.3345
	-6.09422	-0.760888	-33.1838
	-6.0937	-0.433031	-18.8856
	-6.04892	-0.774522	-33.903
	-6.05857	-0.655714	-28.6796
	-6.06234	-0.782962	-34.2351
	-6.0558	-1.13484	-49.6488
	-6.04528	-1.20236	-52.648
	-6.04561	-0.848533	-37.1529
	-6.03067	-0.478477	-20.9748
	-6.04703	-0.694019	-30.3836
	-6.06775	-0.877099	-38.3347
	-6.06215	-0.936178	-40.9356
	-6.08314	-0.511587	-22.3309
	-6.02812	-1.23482	-54.1449
	-5.9975	-0.185028	-8.13271
	-5.96979	-0.583651	-25.7124
	-5.98189	-0.842041	-37.06
	-6.01457	-0.942021	-41.3507
	-5.93493	-0.78491	-34.6774
	-5.94151	-0.9602	-42.3997
	-5.8857	-1.30753	-58.0008
	-5.87111	-1.03746	-46.0743
	-5.87507	-0.602478	-26.7469
	-5.87242	-1.44257	-64.0608
	-5.8688	-0.875152	-38.8729
	-5.85774	-0.882942	-39.2542
	-5.85041	-1.01473	-45.1406
	-5.84451	-0.869958	-38.7185
	-5.82508	-1.17444	-52.3537
	-5.755	-0.812177	-36.4106
	-5.76361	-1.25105	-56.0484
	-5.70726	-0.88489	-39.8248
	-5.68066	-0.736867	-33.2343
	-5.63819	-0.946566	-42.8405
	-5.58798	-0.681683	-30.9776
[truncated: 8,943 more rows]
