# Supplementary material for: Ion Flux in Roots of Chinese Fir (Cunninghamia lanceolata (Lamb.) Hook) under Aluminum Stress
Source: PLoS One. 2016 Jun 6;11(6):e0156832. doi: 10.1371/journal.pone.0156832 (PMC4894599; doi:10.1371/journal.pone.0156832)
Supplement: S4 Table — (XLSX) [file pone.0156832.s005.xlsx]

## Sheet: Mg2+
0-1h-1
DA0(V)	Origin(1)mV	Origin-X(1)uV	#VALUE!
	-36.7715	0.610352	177.017	-64.8538
	-36.8018	0.305176	88.2978
	-36.7715	-0.305176	-88.5191
	-36.7096	0.305176	88.951
	-36.7404	-0.305176	-88.7394
	-36.6177	-0.305176	-89.6141
	-36.6174	0.305176	89.609
	-36.5866	0.305176	89.8299
	-36.586	0.305176	89.8342
	-36.5555	0.305176	90.0535
	-36.4938	-0.305176	-90.5061
	-36.4328	-0.305176	-90.9485
	-36.4322	0.305176	90.9455
	-36.4322	0.305176	90.9455
	-36.4633	-0.610352	-181.461
	-36.4322	0.305176	90.9455
	-36.4328	-0.305176	-90.9485
	-36.4325	0.610352	181.879
	-36.4621	1.2207	362.868
	-36.4325	0.305176	90.9433
	-36.4325	0.610352	181.879
	-36.4636	-0.305176	-90.7249
	-36.4636	0.305176	90.7175
	-36.4941	0.610352	180.986
	-36.4944	0.305176	90.4944
	-36.5552	0.305176	90.0556
	-36.525	0.610352	180.539
	-36.525	0.305176	90.2733
	-36.524	1.2207	361.077
	-36.525	0.610352	180.539
	-36.5561	0.915527	270.125
	-36.6177	0.305176	89.6068
	-36.6177	0.305176	89.6068
	-36.6788	0.610352	178.333
	-36.7099	-0.305176	-88.9561
	-36.6791	-0.305176	-89.1754
	-36.6791	0.305176	89.1681
	-36.7096	0.305176	88.951
	-36.6791	-0.610352	-178.358
	-36.6476	0.915527	268.157
	-36.6483	-0.305176	-89.3952
	-36.5567	-0.305176	-90.0522
	-36.6171	0.305176	89.6111
	-36.5866	-0.610352	-179.682
	-36.5866	-0.305176	-89.8372
	-36.5555	-0.610352	-180.129
	-36.5863	-0.305176	-89.8393
	-36.6476	0.305176	89.3929
	-36.6177	-0.305176	-89.6141
	-36.6171	0.305176	89.6111
	-36.5869	-0.305176	-89.835
	-36.5863	0.305176	89.832
	-36.5863	-0.305176	-89.8393
	-36.5857	0.610352	179.665
	-36.5863	-0.305176	-89.8393
	-36.5863	-0.305176	-89.8393
	-36.4941	0.305176	90.4966
	-36.525	-0.610352	-180.569
	-36.4948	-0.915527	-271.518
	-36.5552	-0.610352	-180.133
	-36.4639	-0.915527	-272.19
	-36.5244	-0.915527	-270.877
	-36.4633	-0.915527	-272.203
	-36.4328	-0.915527	-272.867
	-36.4325	-0.305176	-90.9507
	-36.4017	-1.2207	-364.743
	-36.3397	-1.52588	-458.214
	-36.2473	-0.915527	-276.944
	-36.1859	-0.610352	-185.53
	-36.1862	-0.610352	-185.526
	-36.2164	-0.610352	-185.078
	-36.1853	-0.915527	-278.32
	-36.1246	-1.2207	-372.912
	-36.0928	-0.610352	-186.916
	-36.0629	-1.52588	-468.466
	-36.0318	-0.915527	-281.756
	-36.0007	-0.610352	-188.297
	-35.9705	-0.915527	-283.14
	-35.9393	-0.915527	-283.847
	-35.9079	-0.915527	-284.56
	-35.8469	-1.2207	-381.283
	-35.816	-0.915527	-286.659
	-35.816	-0.915527	-286.659
	-35.7541	-1.2207	-384.122
	-35.7233	-0.610352	-192.52
	-35.6927	-1.2207	-386.012
0-1h-2
DA0(V)	Origin(1)mV	Origin-X(1)uV
	-36.524	8.54492	2525.08	1722.12
	-36.7078	5.49316	1600.24
	-36.5866	5.18799	1526.11
	-36.4642	3.96729	1178.7
	-36.4935	8.8501	2621.54
	-36.4304	6.71387	1999.38
	-36.4023	3.05176	911.298
	-36.0962	6.10352	1866.98
	-36.3702	6.40869	1917.78
	-36.3086	4.57764	1376.94
	-36.3705	4.57764	1370.15
	-36.1865	4.88281	1483.08
	-36.2436	7.62939	2305.92
	-35.8179	6.10352	1908.98
	-36.0608	7.32422	2246.36
	-35.5734	4.27246	1362.99
	-35.6937	7.62939	2409.55
	-35.8136	8.8501	2767.96
	-35.9067	5.79834	1800.78
	-35.9991	5.18799	1599.5
	-35.7562	4.57764	1439.11
	-35.6931	7.01904	2217.07
	-35.8447	6.40869	2000.06
	-35.7852	4.88281	1531.43
	-35.6302	7.01904	2228.24
	-35.48	5.79834	1863.26
	-35.6631	3.35693	1063.4
	-35.9393	5.18799	1607.16
	-35.9402	3.35693	1040.1
	-35.8768	8.23975	2564.29
	-35.7846	4.27246	1340.18
	-35.7242	6.40869	2019.42
	-35.9683	6.71387	2074.62
	-36.1542	3.66211	1115.37
	-35.7846	8.23975	2583.26
	-35.8795	4.88281	1519.93
	-36.0303	6.40869	1970.6
	-36.0928	4.57764	1400.9
	-35.7858	7.32422	2296.29
	-36.091	7.32422	2240.95
	-36.0315	3.66211	1126.36
	-35.8472	7.01904	2189.93
	-35.5118	6.71387	2151.72
	-35.5707	8.8501	2822.23
	-35.8463	6.10352	1904.65
	-35.5722	5.18799	1655.02
	-35.6027	8.23975	2621.1
	-35.8191	3.05176	954.788
	-35.8798	3.96729	1235.07
	-35.939	5.49316	1701.67
	-35.8493	2.74658	857.271
	-36.0025	1.2207	376.448
	-35.7562	3.35693	1055.52
	-35.787	3.66211	1148.6
	-36.0315	4.57764	1407.78
	-35.9677	7.93457	2451.54
	-35.9387	6.71387	2079.53
	-35.9067	8.23975	2558.17
	-35.9988	8.23975	2539.41
	-35.8774	5.79834	1805
	-35.6027	8.54492	2718.06
	-36.0599	5.18799	1591.74
	-35.8456	8.8501	2760.89
	-35.8151	7.62939	2386.28
	-35.9988	7.01904	2163.55
	-35.7864	1.83105	574.464
	-35.9396	5.18799	1607.12
	-35.7843	4.27246	1340.21
	-35.8771	3.05176	950.372
	-35.8163	7.01904	2195.34
	-35.845	9.15527	2856.11
	-35.9375	6.71387	2079.73
	-35.784	4.88281	1531.58
	-35.9085	0.915527	284.477
	-35.6332	3.05176	969.083
	-35.7251	3.96729	1250.43
	-35.8459	2.44141	762.259
	-35.632	3.35693	1066.05
	-35.4776	6.71387	2157.61
	-35.8139	4.27246	1337.04
	-35.5701	4.57764	1460.68
	-35.6924	5.49316	1735.55
	-35.2026	5.49316	1804.85
	-35.3879	3.05176	988.273
	-35.3568	3.96729	1287.8
	-35.6915	5.49316	1735.67
	-35.8453	5.79834	1809.64
	-35.6329	3.66211	1162.83
	-35.6927	6.10352	1928.19
	-35.6	4.88281	1554.27
	-36.0294	3.35693	1032.71
	-35.845	5.79834	1809.68
	-35.6927	5.49316	1735.51
	-35.816	4.57764	1432.25
	-35.6949	3.35693	1060.7
	-35.968	4.88281	1509.22
	-35.7553	4.88281	1535.1
	-35.6647	5.49316	1739.39
	-35.723	8.23975	2596.01
	-35.9378	4.57764	1418.37
	-35.6027	5.79834	1845.08
	-35.7849	5.79834	1818.4
	-35.9369	6.10352	1890.91
	-36.0004	3.35693	1035.11
	-35.8466	4.88281	1523.93
	-35.7227	5.79834	1827.46
	-23.2422	3.35693	2870.19
0-1h-3
DA0(V)	Origin(1)mV	Origin-X(1)uV
	-32.179	3.96729	1660.24	1078.86
	-32.1176	3.66211	1540.13
	-32.0865	4.27246	1801.14
	-32.0248	4.27246	1810.05
	-32.0245	4.88281	2068.51
	-31.9937	4.88281	2073.61
	-31.9019	5.18799	2219.34
	-31.9321	5.49316	2344.13
	-31.871	5.18799	2224.83
	-31.8396	6.10352	2623.71
	-31.8094	5.79834	2498.65
	-31.9016	4.88281	2088.93
	-32.179	1.83105	766.479
	-32.179	1.83105	766.479
	-32.1176	1.52588	641.903
	-32.0868	1.2207	514.808
	-32.1475	0.915527	384.253
	-32.0557	1.2207	516.089
	-32.0557	1.52588	645.087
	-32.0557	1.2207	516.089
	-32.0245	1.83105	776.004
	-32.0248	1.2207	517.365
	-31.9632	1.52588	649.875
	-31.9327	1.52588	651.461
	-31.8713	1.83105	785.566
	-31.9324	1.52588	651.477
	-31.9012	1.83105	783.69
	-31.8399	2.44141	1049.97
	-31.8399	2.44141	1049.97
	-31.8088	2.74658	1184.11
	-31.7783	2.74658	1187
	-31.7783	2.13623	923.297
	-31.8088	2.13623	921.048
	-31.7783	1.52588	659.552
	-31.7166	2.13623	927.862
	-31.6858	2.13623	930.149
	-31.6553	1.52588	666.069
	-31.6241	2.13623	934.748
	-31.5933	2.44141	1070.88
	-31.5622	2.74658	1207.68
	-31.5317	2.13623	941.678
	-31.5009	2.74658	1213.61
	-31.47	3.05176	1351.74
	-31.4703	2.44141	1081.46
	-31.4087	2.74658	1222.59
	-31.4084	3.05176	1358.41
	-31.593	1.2207	535.535
	-31.532	0.915527	403.632
	-31.4706	1.2207	540.801
	-31.5005	1.52588	674.362
	-31.47	1.2207	540.827
	-31.4392	0.915527	406.638
	-31.2241	2.13623	965.12
	-31.3467	1.83105	819.209
	-31.3776	2.13623	953.35
	-31.3776	1.52588	681.02
	-31.3467	2.13623	955.707
	-31.3467	1.83105	819.209
	-31.3159	2.13623	958.063
	-31.3156	2.13623	958.086
	-31.2848	1.83105	823.273
	-31.1926	2.74658	1243.9
	-31.1923	2.74658	1243.92
	-31.1923	2.44141	1105.76
	-31.131	2.44141	1111.19
	-31.131	2.44141	1111.19
	-31.1307	2.44141	1111.22
	-31.0999	3.05176	1392.33
	-31.0999	2.44141	1113.96
	-31.0693	2.74658	1256.22
	-31.0385	3.05176	1399.18
	-31.008	3.05176	1402.6
	-31.0382	3.05176	1399.22
	-31.008	2.44141	1122.17
	-31.0388	1.83105	839.623
	-31.0382	2.13623	979.569
	-30.9769	2.13623	984.381
	-31.0025	2.13623	982.369
	-30.484	1.83105	877.698
	-30.5145	2.13623	1021.45
	-30.5453	2.13623	1018.94
	-30.5457	1.83105	873.379
	-30.5759	1.83105	871.274
	-30.5762	1.52588	726.076
0-1h-4
DA0(V)	Origin(1)mV	Origin-X(1)uV
	-21.1435	1.83105	1851.9	2185.93
	-20.8664	1.2207	1262.35
	-20.6201	1.2207	1287.45
	-20.3116	1.83105	1979.24
	-20.0964	1.2207	1342.5
	-19.8801	1.52588	1707.32
	-19.7253	1.2207	1382.92
	-19.4485	1.52588	1767.26
	-19.2941	1.83105	2146.95
	-19.0787	1.83105	2184.24
	-18.9243	2.13623	2579.83
	-18.7088	1.52588	1874.91
	-18.5239	1.2207	1522.32
	-18.2767	0.915527	1164.57
	-17.9071	0.915527	1199.49
	-17.6605	1.2207	1631.1
	-17.4139	0.915527	1247.73
	-17.1683	0.610352	848.348
	-17.0132	1.52588	2147.07
	-16.8283	1.83105	2614.73
	-16.644	1.2207	1769.17
	-16.3361	1.2207	1813.25
	-16.1819	1.52588	2294.59
	-16.1197	1.83105	2767.12
	-15.9967	1.2207	1863.12
	-15.8118	1.52588	2363.49
	-15.719	1.52588	2381.09
	-15.5655	0.915527	1446.41
	-15.4724	1.83105	2914.07
	-15.1334	1.83105	2994.11
	-15.0714	1.52588	2507.6
	-14.8254	1.2207	2046
	-14.7943	1.52588	2563.77
	-14.6405	1.2207	2076.46
	-14.5166	1.52588	2621.32
	-14.3021	1.2207	2133.4
	-14.1162	1.52588	2706.58
	-14.0244	1.2207	2181.29
	-13.8702	1.2207	2208.34
	-13.8394	1.52588	2767.13
	-13.7161	1.52588	2794.54
	-13.6853	1.2207	2241.23
	-13.5931	0.915527	1693.43
	-13.5617	1.52588	2829.25
	-13.5922	1.52588	2822.36
	-13.439	1.2207	2285.79
	-13.4387	1.2207	2285.85
	-13.3768	0.915527	1722.96
	-13.3765	1.52588	2871.44
	-13.2544	1.2207	2319.77
	-13.3463	0.915527	1727.17
	-13.3157	1.2207	2308.43
	-13.2541	0.915527	1739.95
	-13.2843	1.52588	2892.68
	-13.3151	1.2207	2308.54
	-13.1613	1.2207	2337.1
	-13.1302	1.52588	2928.54
	-13.1	1.52588	2935.62
	-13.0692	1.52588	2942.85
	-13.0994	1.52588	2935.76
	-13.0386	0.915527	1770.18
	-13.0075	1.52588	2957.4
	-13.0682	1.52588	2943.09
	-13.0072	1.2207	2366.07
	-12.9764	1.52588	2964.77
0-1h-5
DA0(V)	Origin(1)mV	Origin-X(1)uV
	-35.0137	3.05176	1018.28	1402.49
	-34.8904	2.44141	822.762
	-34.6445	3.66211	1258.44
	-34.4897	2.44141	849.543
	-34.1513	2.13623	763.762
	-33.8425	3.35693	1229.99
	-33.6578	2.74658	1021.41
	-33.5037	3.35693	1263.76
	-33.288	2.74658	1052.05
	-32.98	3.05176	1198.04
	-32.825	3.35693	1334.22
	-32.6102	3.05176	1233.98
	-32.4265	3.35693	1377.4
	-32.3636	3.05176	1258.55
	-32.1777	2.44141	1022
	-31.9626	3.35693	1429.44
	-31.778	3.05176	1318.87
	-31.6229	3.35693	1468.79
	-31.5704	3.35693	1474.97
	-32.1472	2.44141	1024.49
	-31.8085	2.44141	1052.61
	-31.6238	3.35693	1468.68
	-31.4386	2.44141	1084.2
	-31.2231	3.35693	1516.49
	-31.1301	3.35693	1527.81
	-30.946	2.74658	1268.66
	-30.853	3.66211	1703.96
	-30.7611	3.35693	1573.54
	-30.6989	2.13623	1006.5
	-30.4529	3.35693	1612.79
	-31.3458	2.74658	1228.75
	-31.069	2.74658	1256.25
	-30.8838	3.35693	1558.19
	-30.7608	3.05176	1430.59
	-30.6372	3.66211	1733.61
	-30.5145	3.35693	1604.87
	-30.4532	3.05176	1466.2
	-30.4526	3.66211	1759.38
	-30.3293	3.66211	1776.81
	-30.3909	3.05176	1473.52
	-30.2371	3.05176	1491.75
	-30.2063	3.35693	1644.9
	-30.2063	3.66211	1794.37
	-30.2063	3.35693	1644.9
	-30.206	3.66211	1794.41
	-30.2057	3.35693	1644.98
	-30.0827	3.66211	1812.18
	-30.1129	3.35693	1657.23
	-29.9908	3.96729	1977.6
	-30.1755	3.05176	1499.11
	-30.1755	3.35693	1648.96
	-30.1447	3.35693	1653.02
	-30.1443	3.35693	1653.07
	-30.1443	3.35693	1653.07
	-30.083	3.66211	1812.14
	-30.083	2.74658	1359.27
	-30.1752	2.74658	1349.29
	-30.1135	3.35693	1657.15
	-30.083	3.35693	1661.19
	-30.0214	3.35693	1669.39
	-30.1443	3.35693	1653.07
	-30.1761	3.05176	1499.04
	-30.1767	3.35693	1648.8
	-30.2988	3.05176	1484.41
	-30.2682	3.35693	1636.78
	-30.3293	3.35693	1628.81
	-30.2988	3.05176	1484.41
	-30.2679	3.35693	1636.82
	-30.2988	3.05176	1484.41
	-30.2988	3.35693	1632.78
	-30.2988	3.05176	1484.41
	-30.2679	2.74658	1339.33
	-30.2063	3.35693	1644.9
	-30.206	3.05176	1495.46
	-31.7471	2.44141	1057.79
	-31.6852	2.74658	1195.87
	-31.5628	2.74658	1207.62
	-31.5317	2.44141	1076.16
	-31.5009	2.74658	1213.61
	-31.5015	3.05176	1348.34
	-31.6238	3.05176	1335.22
	-31.6241	2.74658	1201.72
	-31.6238	3.05176	1335.22
	-31.5933	2.74658	1204.68
	-31.5323	2.74658	1210.57
	-31.593	3.05176	1338.52
	-31.9016	4.27246	1827.96
	-32.0554	2.74658	1160.99
	-31.994	2.74658	1166.71
	-32.8262	2.74658	1091.62
	-32.8259	2.74658	1091.64
	-32.7951	4.27246	1701.95
	-32.9495	2.74658	1080.91
	-32.981	2.44141	958.434
	-33.0112	2.74658	1075.59
0-1h-6
	-33.5663	4.88281	1828.65	1347.01
	-33.5968	5.18799	1938.13
	-33.6273	5.18799	1933.41
	-33.5968	5.18799	1938.13
	-33.6273	5.18799	1933.41
	-33.6588	4.27246	1588.41
	-33.6581	4.88281	1815.28
	-33.6584	4.57764	1701.86
	-33.6279	4.57764	1706.01
	-33.6893	4.57764	1697.66
	-33.6584	4.57764	1701.86
	-33.689	4.27246	1584.58
	-33.6276	4.57764	1706.05
	-33.6276	4.57764	1706.05
	-33.689	4.27246	1584.58
	-33.6584	4.27246	1588.46
	-33.7198	4.27246	1580.68
	-33.6893	3.66211	1358.29
	-33.6276	4.27246	1592.38
	-33.6893	3.96729	1471.42
	-33.6893	3.96729	1471.42
	-33.6887	4.27246	1584.62
	-33.6584	3.96729	1475.06
	-33.6581	3.96729	1475.1
	-33.6276	4.27246	1592.38
	-33.6279	3.66211	1364.97
	-33.6276	4.27246	1592.38
	-33.6588	3.05176	1134.76
	-33.5965	3.96729	1482.38
	-33.5657	3.66211	1371.78
	-33.566	3.66211	1371.74
	-33.6276	3.66211	1365.01
	-33.6584	3.35693	1248.23
	-33.6893	3.35693	1245.15
	-33.6893	2.74658	1018.84
	-33.6584	3.35693	1248.23
	-33.6584	3.35693	1248.23
	-33.6588	3.05176	1134.76
	-33.6893	3.35693	1245.15
	-33.7204	2.74658	1016.31
	-33.7204	3.35693	1242.06
	-33.8126	3.05176	1120.9
	-33.8739	3.05176	1115.42
	-33.8739	2.74658	1003.92
	-33.8129	3.05176	1120.87
	-33.8739	3.35693	1226.91
	-33.8434	2.74658	1006.37
	-33.8126	3.35693	1232.94
	-33.8431	3.35693	1229.93
	-33.8434	3.05176	1118.14
	-33.9047	3.05176	1112.68
	-33.8745	3.05176	1115.37
	-33.9355	3.05176	1109.94
	-33.9664	3.05176	1107.2
	-33.9664	2.74658	996.521
	-33.905	3.05176	1112.65
	-33.9667	2.74658	996.497
	-33.9975	2.74658	994.046
	-34.0588	2.74658	989.187
	-33.9978	3.05176	1104.43
	-34.0591	2.74658	989.164
	-34.0903	2.13623	767.496
	-34.09	2.44141	877.125
	-34.0897	2.44141	877.146
0-1h-7
DA0(V)	Origin(1)mV	Origin-X(1)uV
	-34.9548	-0.915527	-307.088	-208.683
	-35.321	-1.52588	-497.089
	-35.1389	-1.83105	-605.276
	-35.1688	-0.610352	-201.245
	-35.3842	-2.13623	-692.474
	-35.1697	-1.83105	-603.788
	-35.4434	-0.915527	-295.325
	-35.1083	0.305176	101.098
	-35.2295	-0.915527	-300.418
	-35.2899	-0.305176	-99.6491
	-35.0793	-0.915527	-304.047
	-34.9857	-0.610352	-204.212
	-35.2615	-2.74658	-899.171
	-35.0769	0.610352	202.696
	-35.2002	-0.915527	-301.123
	-35.2609	-0.305176	-99.8804
	-35.3842	-1.52588	-494.584
	-35.5688	1.2207	389.728
	-35.5402	0.610352	195.326
	-35.6006	-0.305176	-97.2046
	-35.5682	-0.305176	-97.4567
	-35.4459	-1.2207	-393.703
	-35.4456	0.305176	98.4085
	-35.5069	-1.52588	-489.757
	-35.448	-0.915527	-295.217
	-35.5383	-0.610352	-195.388
	-35.5688	-1.2207	-389.854
	-35.3229	1.52588	496.812
	-35.6012	-1.2207	-388.846
	-35.5078	0.305176	97.9204
	-35.7251	-2.44141	-770.156
	-35.5423	-3.35693	-1074.68
	-35.5695	0.915527	292.292
	-35.7529	-0.610352	-192.065
	-35.509	-0.915527	-293.781
	-35.5997	-0.305176	-97.2116
	-35.6314	-2.13623	-678.924
	-35.5695	-0.610352	-194.901
	-35.5389	-1.83105	-586.229
	-35.6293	-0.610352	-193.972
	-35.6317	-2.13623	-678.908
	-35.6921	-1.83105	-579.093
	-35.7526	1.52588	480.036
	-35.7538	-1.52588	-480.185
	-35.6009	1.52588	485.893
	-35.7837	-0.305176	-95.7922
	-35.6305	-0.610352	-193.953
	-35.8765	-0.915527	-285.276
	-35.7861	-0.305176	-95.7738
	-35.7556	-0.915527	-288.046
	-36.1865	0.915527	278.225
	-36.185	-0.610352	-185.544
	-36.0626	1.52588	468.287
	-36.1545	-1.2207	-372.022
	-36.2173	-1.52588	-462.719
	-36.2476	-0.305176	-92.305
	-36.2473	-1.52588	-461.611
	-36.1255	-0.915527	-279.653
	-36.2772	-1.2207	-368.391
	-36.2482	-1.2207	-369.246
	-36.2476	-0.915527	-276.937
	-36.4001	-2.13623	-638.461
	-36.1255	-0.305176	-93.2103
	-36.1551	0.305176	92.9825
	-36.2463	0.305176	92.3071
	-36.3098	-1.52588	-459.311
	-36.1557	-0.610352	-185.979
	-36.2781	-0.915527	-276.263
	-36.2784	-2.13623	-644.703
	-36.4008	-0.610352	-182.37
	-36.3705	-0.305176	-91.4026
	-36.463	-2.13623	-635.259
	-36.3403	-1.2207	-366.538
	-36.3705	-1.52588	-457.087
	-36.3095	0.915527	275.503
	-36.5222	0.610352	180.58
	-36.3712	0.610352	182.773
	-36.4029	-0.305176	-91.1662
	-36.3724	-1.52588	-457.018
	-36.3077	0.610352	183.703
	-36.3708	0.610352	182.778
	-36.4304	-0.305176	-90.966
	-36.4932	-2.44141	-724.29
	-36.34	1.2207	366.427
	-36.3425	-1.2207	-366.473
	-36.7087	-0.610352	-177.936
	-36.4938	0.915527	271.474
	-36.6476	-1.2207	-357.643
	-36.5863	-0.305176	-89.8393
	-36.6479	0.305176	89.3908
0-1h-8
DA0(V)	Origin(1)mV	Origin-X(1)uV
	-36.7407	6.71387	1950.4	1803.51
	-36.6785	7.01904	2049.13
	-36.586	7.32422	2154
	-36.5247	6.40869	1894.24
	-36.4014	6.40869	1913.01
	-36.3397	6.71387	2013.93
	-36.3092	6.40869	1927.16
	-36.3086	6.40869	1927.25
	-36.2164	6.40869	1941.51
	-36.1243	6.40869	1955.85
	-36.0934	6.71387	2053.97
	-36.0934	6.71387	2053.97
	-36.0931	7.01904	2147.3
	-36.0629	6.71387	2058.99
	-36.0934	6.71387	2053.97
	-36.1246	6.40869	1955.81
	-36.1243	6.71387	2048.91
	-36.1551	6.40869	1951.04
	-36.1243	6.71387	2048.91
	-36.1551	6.71387	2043.87
	-36.1554	6.40869	1951
	-36.1859	6.40869	1946.25
	-36.1859	6.71387	2038.84
	-36.217	6.40869	1941.41
	-36.2784	6.10352	1839.99
	-36.3089	6.40869	1927.2
	-36.2784	6.40869	1931.91
	-36.3092	6.71387	2018.85
	-36.3095	6.10352	1835.42
	-36.3092	6.40869	1927.16
	-36.3705	5.79834	1735.24
	-36.3092	6.40869	1927.16
	-36.3403	6.10352	1830.91
	-36.3712	5.79834	1735.14
	-36.3708	6.10352	1826.45
	-36.3708	6.10352	1826.45
	-36.3708	6.10352	1826.45
	-36.4017	6.10352	1821.94
	-36.402	5.79834	1730.87
	-36.4322	6.10352	1817.51
	-36.4017	6.10352	1821.94
	-36.3712	6.40869	1917.63
	-36.4633	6.10352	1812.99
	-36.4944	5.49316	1627.77
	-36.4941	5.79834	1718.18
	-36.4636	5.49316	1631.78
	-36.4636	5.49316	1631.78
	-36.4941	6.10352	1808.53
	-36.4941	6.10352	1808.53
	-36.4944	6.40869	1898.84
	-36.5555	6.10352	1799.68
	-36.525	6.10352	1804.07
	-36.5558	5.79834	1709.72
	-36.5558	5.79834	1709.72
	-36.5869	6.10352	1795.17
	-36.6785	5.79834	1693.03
	-36.5558	6.40869	1889.54
	-36.5555	6.10352	1799.68
	-36.5561	5.79834	1709.68
	-36.6171	6.10352	1790.84
	-36.5869	5.79834	1705.48
	-36.6174	6.10352	1790.8
	-36.6174	5.79834	1701.32
	-36.586	5.79834	1705.6
	-36.525	6.40869	1894.2
	-36.5558	6.10352	1799.64
	-36.5561	6.10352	1799.59
	-36.6171	5.79834	1701.36
	-36.5555	6.10352	1799.68
	-36.5863	6.10352	1795.25
	-36.5558	5.79834	1709.72
	-36.5558	6.10352	1799.64
	-36.6171	6.10352	1790.84
	-36.5866	5.49316	1615.82
	-36.5558	5.49316	1619.8
	-36.4941	5.79834	1718.18
	-36.4633	6.10352	1812.99
	-36.525	6.10352	1804.07
	-36.5558	5.79834	1709.72
	-36.5555	5.79834	1709.76
	-36.4972	5.79834	1717.75
	-36.8021	5.79834	1676.39
	-36.8326	5.49316	1584.35
	-36.7715	5.49316	1592.11
	-36.8021	5.49316	1588.22
	-36.8027	5.49316	1588.15
	-36.7715	6.10352	1768.87
	-36.8329	5.49316	1584.32
	-36.8027	5.18799	1499.98
	-36.8021	6.10352	1764.55
	-36.8027	5.49316	1588.15
	-36.8637	5.79834	1668.15
	-36.8332	5.79834	1672.23
	-36.864	5.49316	1580.38
	-36.8643	5.79834	1668.07
	-36.8948	5.49316	1576.5
	-36.8945	6.10352	1751.56
	-36.9254	5.49316	1572.64
	-36.926	5.18799	1485.27
	-36.9565	5.18799	1481.65
0-1h-9
DA0(V)	Origin(1)mV	Origin-X(1)uV
	-30.3909	-0.305176	-34.5614	-62.8932
	-30.3296	-0.305176	-34.7254
	-30.3293	-0.305176	-34.7262
	-30.2988	-0.305176	-34.8081
	-30.2679	-0.305176	-34.8912
	-30.1749	0.305176	35.14
	-29.9289	-0.305176	-35.8167
	-29.8669	-0.305176	-35.9886
	-29.7748	-0.305176	-36.2454
	-29.6204	0.305176	36.6773
	-29.6201	0.305176	36.6782
	-29.5901	-0.305176	-36.7661
	-29.6204	-0.305176	-36.6802
	-29.559	-0.305176	-36.8545
	-29.4662	0.305176	37.1166
	-29.4052	-0.305176	-37.2948
	-29.4052	-0.305176	-37.2948
	-29.4357	-0.305176	-37.2071
	-29.4049	0.305176	37.2928
	-29.3127	-0.305176	-37.5622
	-29.2816	-0.305176	-37.6525
	-29.2203	-0.305176	-37.8311
	-29.2197	-0.305176	-37.8329
	-29.1888	-0.305176	-37.9233
	-29.035	-0.305176	-38.3764
	-29.0039	-0.610352	-76.9403
	-28.9114	-0.305176	-38.7444
	-28.8193	-0.610352	-78.0449
	-28.7573	-0.305176	-39.2082
	-28.6649	-0.305176	-39.489
	-28.5721	-0.305176	-39.773
	-28.4799	-0.610352	-80.1174
	-28.3261	-0.915527	-121.617
	-28.2025	-0.610352	-81.8522
	-28.0176	-0.610352	-83.0292
	-27.8632	-0.610352	-84.0251
	-27.6477	-0.915527	-128.158
	-27.4933	-0.915527	-129.695
	-27.2778	-0.915527	-131.871
	-27.0926	-0.610352	-89.1769
	-26.908	-0.610352	-90.4573
	-26.7844	-0.610352	-91.3248
	-26.5994	-0.610352	-92.6388
	-26.4453	-0.610352	-93.7477
	-26.2604	-0.610352	-95.0959
	-26.0449	-0.610352	-96.6916
	-25.9216	-0.610352	-97.6167
	-25.7675	-0.610352	-98.7852
	-25.6134	-0.610352	-99.9678
	-25.5206	-0.610352	-100.687
	-25.3668	-0.915527	-152.84
	-25.1822	-0.610352	-103.352
	-25.0891	-0.305176	-52.0471
	-24.9661	-0.610352	-105.092
	-24.8431	-0.305176	-53.0452
	-24.6579	-0.305176	-53.8093
	-24.5963	-0.305176	-54.0658
	-24.5041	-0.305176	-54.4522
	-24.473	-0.610352	-109.17
	-24.35	-0.305176	-55.104
	-24.2575	-0.610352	-111.002
	-24.165	-0.305176	-55.8969
	-24.0723	-0.305176	-56.2984
	-23.9182	-0.610352	-113.949
	-23.7952	-0.610352	-115.037
	-23.7027	-0.305176	-57.9284
	-23.6411	-0.305176	-58.2046
	-23.4561	-0.305176	-59.0421
	-23.3942	-0.610352	-118.655
	-23.302	-0.610352	-119.502
	-23.2401	-0.305176	-60.0351
0-1h-10
	-32.1793	-0.610352	-60.209	20.0505
	-32.179	-0.305176	-30.104
	-32.1793	-0.305176	-30.1033
	-32.2098	0.305176	30.0302
	-32.2409	-0.305176	-29.9605
	-32.2714	0.305176	29.8876
	-32.3022	0.305176	29.8166
	-32.3328	0.305176	29.7463
	-32.3022	0.305176	29.8166
	-32.3026	-0.305176	-29.8181
	-32.3022	0.305176	29.8166
	-32.3325	0.610352	59.4916
	-32.2714	0.305176	29.8876
	-32.2714	-0.305176	-29.89
	-32.2403	0.305176	29.9595
	-32.2101	-0.305176	-30.0318
	-32.1786	0.305176	30.1026
	-32.1481	-0.305176	-30.1759
	-32.1173	0.305176	30.2454
	-32.0557	0.305176	30.3896
	-32.0245	0.305176	30.4629
	-32.0245	0.305176	30.4629
	-31.994	-0.305176	-30.5372
	-31.9632	0.305176	30.6075
	-31.9324	0.305176	30.6804
	-31.9629	0.305176	30.6082
	-31.9324	0.305176	30.6804
	-31.9635	-0.305176	-30.6092
	-31.9632	0.305176	30.6075
	-31.9934	0.305176	30.5362
	-31.9324	0.305176	30.6804
	-31.9321	0.305176	30.6811
	-31.8704	0.305176	30.8276
	-31.8701	0.305176	30.8283
	-31.8088	0.305176	30.9746
	-31.7474	0.305176	31.1218
	-31.7474	0.305176	31.1218
	-31.7474	0.305176	31.1218
	-31.7474	0.305176	31.1218
	-31.7474	0.305176	31.1218
	-31.7166	0.305176	31.1959
	-31.6858	0.305176	31.2702
	-31.6858	0.305176	31.2702
	-31.6858	-0.305176	-31.2727
	-31.6241	0.305176	31.4196
	-31.5009	0.305176	31.7199
	-31.47	0.305176	31.7957
	-31.47	0.305176	31.7957
	-31.47	0.305176	31.7957
	-31.4392	-0.305176	-31.8739
	-31.4389	-0.305176	-31.8746
	-31.3467	-0.305176	-32.1024
	-31.3159	0.305176	32.1763
	-31.3464	0.305176	32.1006
	-31.2543	0.305176	32.3297
	-31.254	0.610352	64.6584
	-31.2231	0.610352	64.8128
	-31.1926	0.305176	32.4841
	-31.1618	0.305176	32.5615
	-31.1005	0.610352	65.4294
	-31.1307	0.305176	32.6398
	-31.0693	0.305176	32.7949
	-31.0693	0.305176	32.7949
	-31.069	0.610352	65.5887
	-31.0385	0.305176	32.873
	-31.0077	0.305176	32.9513
0-1h-11
DA0(V)	Origin(1)mV	Origin-X(1)uV
	-29.7742	-0.305176	-36.2471	93.5423
	-29.6207	-0.610352	-73.3615
	-29.4357	-0.305176	-37.2071
	-29.343	-0.305176	-37.4744
	-29.2203	-0.610352	-75.6653
	-29.158	-0.610352	-76.0302
	-29.035	-0.305176	-38.3764
	-28.757	-0.305176	-39.2091
	-28.634	-0.610352	-79.1697
	-28.511	0.610352	79.9127
	-28.3875	0.305176	40.3408
	-28.1717	0.610352	82.0342
	-28.0176	0.305176	41.5097
	-27.9251	0.305176	41.8073
	-27.8329	0.305176	42.106
	-27.7097	0.305176	42.5085
	-27.6477	0.305176	42.7125
	-27.4933	0.305176	43.2248
	-27.4319	0.610352	86.8571
	-27.3703	0.915527	130.902
	-27.3392	0.915527	131.216
	-27.124	0.610352	88.947
	-27.0932	0.610352	89.1588
	-27.0316	0.915527	134.37
	-27.0309	0.915527	134.378
	-26.9696	0.305176	45.0087
	-26.908	0.610352	90.443
	-26.8158	0.305176	45.5464
	-26.7542	0.610352	91.5236
	-26.7545	0.305176	45.7625
	-26.6925	0.305176	45.9822
	-26.5692	0.610352	92.8405
	-26.5381	1.2207	186.112
	-26.5387	0.610352	93.0594
	-26.5076	0.610352	93.2832
	-26.4767	0.610352	93.506
	-26.4456	0.610352	93.7308
	-26.4148	0.915527	140.925
	-26.3223	0.915527	141.936
	-26.2607	1.2207	190.142
	-26.2302	0.610352	95.3029
	-26.2299	0.915527	142.952
	-26.1374	1.2207	191.961
	-26.1066	0.610352	96.2169
	-26.0452	0.610352	96.6742
	-26.0141	0.610352	96.9066
	-25.9528	0.610352	97.3665
	-25.8914	0.915527	146.738
	-25.8908	1.2207	195.651
	-25.8292	0.915527	147.444
	-25.7675	0.610352	98.7697
	-25.6448	0.610352	99.71
	-25.6442	0.610352	99.7146
	-25.6134	0.915527	149.922
	-25.5521	0.915527	150.633
	-25.5209	1.2207	201.321
	-25.4898	0.610352	100.911
	-25.4285	0.610352	101.389
	-25.3363	0.610352	102.114
	-25.336	0.305176	51.0601
	-25.2744	1.2207	205.189
	-25.2753	0.610352	102.596
	-25.2744	1.2207	205.189
	-25.213	0.610352	103.091
	-25.1825	0.305176	51.669
	-25.1514	0.610352	103.582
	-25.1202	0.610352	103.832
	-25.0894	0.915527	156.113
	-25.0894	0.610352	104.079
	-24.9973	0.305176	52.4132
	-24.9661	1.2207	210.133
	-24.9661	0.610352	105.075
	-24.9356	0.305176	52.6635
	-24.874	0.915527	158.731
	-24.8431	0.610352	106.078
	-24.8123	0.610352	106.331
	-24.751	0.915527	160.246
	-24.812	0.915527	159.493
	-24.7818	0.610352	106.581
	-24.8123	0.305176	53.1673
	-24.689	0.915527	161.015
	-24.6887	0.610352	107.35
	-24.7198	0.305176	53.5485
	-24.6893	0.610352	107.345
	-24.689	1.2207	214.678
	-24.689	0.610352	107.348
	-24.6274	0.610352	107.86
	-24.6274	0.610352	107.86
	-24.5654	0.915527	162.559
	-24.5349	0.305176	54.3185
	-24.4736	0.610352	109.148
	-24.4736	0.915527	163.716
	-24.5035	0.915527	163.338
	-24.4119	0.305176	54.8369
0.5-1h-1
DA0(V)	Origin(1)mV	Origin-X(1)uV	#VALUE!
	-35.6006	2.44141	157.072	154.256
	-35.6003	3.05176	196.33
	-35.6311	2.74658	176.317
	-35.6308	3.05176	195.905
	-35.6311	2.44141	156.732
	-35.6006	2.74658	176.699
	-35.6613	3.05176	195.482
	-35.7236	2.44141	155.707
	-35.7233	2.44141	155.71
	-35.6927	2.44141	156.049
	-35.6619	2.44141	156.39
	-35.6314	2.44141	156.729
	-35.6616	2.74658	175.936
	-35.6311	2.44141	156.732
	-35.6003	2.44141	157.075
	-35.6003	2.44141	157.075
	-35.6003	2.13623	137.445
	-35.5698	2.74658	177.086
	-35.5695	2.74658	177.089
	-35.5698	2.44141	157.415
	-35.5695	2.74658	177.089
	-35.5695	2.74658	177.089
	-35.6	2.44141	157.079
	-35.5695	2.44141	157.419
	-35.5695	2.44141	157.419
	-35.5386	2.74658	177.478
	-35.5081	2.74658	177.862
	-35.5692	2.74658	177.093
	-35.5078	2.74658	177.866
	-35.5078	2.74658	177.866
	-35.5078	2.74658	177.866
	-35.477	3.05176	198.055
	-35.477	2.74658	178.255
	-35.4465	2.74658	178.641
	-35.5078	2.74658	177.866
	-35.5383	2.44141	157.768
	-35.5078	2.44141	158.109
	-35.5078	2.44141	158.109
	-35.5078	2.44141	158.109
	-35.5078	2.44141	158.109
	-35.5078	2.13623	138.35
	-35.477	2.44141	158.455
	-35.5075	2.44141	158.113
	-35.5075	2.44141	158.113
	-35.5075	2.13623	138.353
	-35.4767	2.44141	158.459
	-35.4767	2.44141	158.459
	-35.4462	2.44141	158.802
	-35.4462	2.13623	138.956
	-35.4462	2.13623	138.956
	-35.415	2.74658	179.041
	-35.4459	2.13623	138.959
	-35.415	2.13623	139.264
	-35.3848	1.83105	119.629
	-35.3845	1.83105	119.632
	-35.354	1.52588	99.9132
	-35.3845	1.83105	119.632
	-35.3842	1.83105	119.635
	-35.3537	2.13623	139.871
	-35.3845	1.83105	119.632
	-35.3842	1.52588	99.6994
	-35.3537	1.52588	99.9154
	-35.3229	1.83105	120.156
	-35.3229	1.52588	100.134
	-35.2921	1.52588	100.353
	-35.2917	1.83105	120.422
	-35.2304	2.13623	141.1
	-35.2301	2.44141	161.255
0.5-1h-2
DA0(V)	Origin(1)mV	Origin-X(1)uV
	-36.217	-0.305176	-18.8	-20.2501
	-36.2473	-0.305176	-18.7596
	-36.2476	-0.305176	-18.7592
	-36.2167	-0.610352	-37.6021
	-36.1551	-0.305176	-18.8827
	-36.1551	-0.305176	-18.8827
	-36.1551	-0.305176	-18.8827
	-36.1548	-0.305176	-18.8831
	-36.1243	-0.305176	-18.924
	-36.0938	-0.305176	-18.965
	-36.1243	-0.305176	-18.924
	-36.1243	-0.610352	-37.8494
	-36.0626	-0.305176	-19.007
	-36.0318	-0.305176	-19.0486
	-36.001	-0.305176	-19.0903
	-35.9705	-0.305176	-19.1316
	-35.9702	-0.305176	-19.132
	-35.9705	-0.305176	-19.1316
	-35.9702	-0.305176	-19.132
	-36.0007	-0.305176	-19.0907
	-36.001	-0.305176	-19.0903
	-36.0007	-0.305176	-19.0907
	-36.001	-0.305176	-19.0903
	-36.0007	-0.305176	-19.0907
	-35.9698	-0.305176	-19.1326
	-35.9702	-0.305176	-19.132
	-35.9702	-0.305176	-19.132
	-35.9698	-0.305176	-19.1326
	-35.9702	-0.305176	-19.132
	-35.9393	-0.305176	-19.174
	-35.9088	-0.305176	-19.2156
	-35.9698	-0.305176	-19.1326
	-35.9393	-0.305176	-19.174
	-35.9393	-0.305176	-19.174
	-35.9393	-0.305176	-19.174
	-35.9085	-0.305176	-19.216
	-35.9088	-0.305176	-19.2156
	-35.9082	-0.305176	-19.2164
	-35.8472	-0.305176	-19.2997
	-35.8777	-0.305176	-19.258
	-35.8777	-0.305176	-19.258
	-35.8466	-0.305176	-19.3005
	-35.816	-0.305176	-19.3425
	-35.7852	-0.305176	-19.3848
	-35.7544	-0.305176	-19.4272
	-35.7239	-0.610352	-38.94
	-35.6931	-0.305176	-19.5119
	-35.6927	-0.305176	-19.5124
	-35.6622	-0.305176	-19.5547
	-35.6619	-0.305176	-19.5551
	-35.6622	-0.305176	-19.5547
	-35.6924	-0.305176	-19.5128
0.5-1h-3
DA0(V)	Origin(1)mV	Origin-X(1)uV
	-36.9873	-0.305176	-17.8001	-0.445024
	-37.0175	-0.305176	-17.762
	-36.9565	-0.610352	-35.6794
	-36.9254	-0.305176	-17.8785
	-36.9254	-0.610352	-35.7582
	-36.8329	-0.305176	-17.9962
	-36.7715	-0.305176	-18.0747
	-36.7407	-0.305176	-18.1143
	-36.7099	-0.305176	-18.1539
	-36.7099	-0.305176	-18.1539
	-36.6788	-0.305176	-18.194
	-36.6483	-0.305176	-18.2334
	-36.6174	-0.305176	-18.2734
	-36.5866	-0.305176	-18.3134
	-36.525	-0.610352	-36.7885
	-36.4938	-0.305176	-18.4344
	-36.4322	-0.305176	-18.5151
	-36.4014	0.305176	18.5543
	-36.4014	-0.305176	-18.5556
	-36.3095	-0.305176	-18.677
	-36.34	-0.305176	-18.6366
	-36.3089	0.305176	18.6764
	-36.3092	-0.305176	-18.6774
	-36.2781	0.305176	18.7173
	-36.2784	-0.305176	-18.7182
	-36.2479	-0.305176	-18.7588
	-36.2167	0.305176	18.799
	-36.2476	0.305176	18.7578
	-36.2784	0.305176	18.7169
	-36.2781	0.305176	18.7173
	-36.2473	0.305176	18.7582
	-36.2473	0.305176	18.7582
	-36.2479	-0.305176	-18.7588
	-36.2167	0.305176	18.799
	-36.2473	0.305176	18.7582
	-36.217	0.305176	18.7986
	-36.2781	0.305176	18.7173
	-36.2167	0.305176	18.799
	-36.2167	0.305176	18.799
	-36.2473	0.305176	18.7582
	-36.2167	0.305176	18.799
	-36.2167	0.305176	18.799
	-36.2167	0.305176	18.799
	-36.1862	0.305176	18.8397
	-36.2167	0.305176	18.799
	-36.2167	0.305176	18.799
	-36.2167	0.305176	18.799
	-36.1859	0.305176	18.8401
	-36.2167	-0.305176	-18.8004
	-36.2167	-0.305176	-18.8004
	-36.1859	0.305176	18.8401
	-36.1554	0.305176	18.8809
	-36.1856	0.305176	18.8405
0.5-1h-4
DA0(V)	Origin(1)mV	Origin-X(1)uV
	-36.6171	0.305176	18.2725	22.5597
	-36.6171	0.305176	18.2725
	-36.5866	0.305176	18.3121
	-36.5558	0.305176	18.3521
	-36.5555	0.610352	36.7037
	-36.5558	0.305176	18.3521
	-36.5247	0.305176	18.3927
	-36.463	0.305176	18.4734
	-36.4319	0.610352	37.027
	-36.4319	0.305176	18.5142
	-36.4014	0.305176	18.5543
	-36.4014	0.305176	18.5543
	-36.3089	0.305176	18.6764
	-36.2784	0.305176	18.7169
	-36.2784	0.305176	18.7169
	-36.2784	0.305176	18.7169
	-36.2781	0.305176	18.7173
	-36.2781	0.305176	18.7173
	-36.2167	0.305176	18.799
	-36.2164	0.305176	18.7994
	-36.1859	0.305176	18.8401
	-36.1859	0.305176	18.8401
	-36.1862	0.305176	18.8397
	-36.2473	0.305176	18.7582
	-36.2167	0.305176	18.799
	-36.2476	0.305176	18.7578
	-36.2781	0.305176	18.7173
	-36.2476	0.610352	37.5143
	-36.2476	0.610352	37.5143
	-36.2476	0.305176	18.7578
	-36.2476	0.305176	18.7578
	-36.2781	0.305176	18.7173
	-36.2479	0.305176	18.7574
	-36.2784	0.610352	37.4324
	-36.2784	0.305176	18.7169
	-36.2476	0.305176	18.7578
	-36.2167	0.610352	37.5966
	-36.2167	0.305176	18.799
	-36.2473	0.305176	18.7582
	-36.2476	0.305176	18.7578
	-36.2476	0.610352	37.5143
	-36.2479	0.305176	18.7574
	-36.2781	0.610352	37.4332
	-36.2476	0.305176	18.7578
	-36.2476	0.305176	18.7578
	-36.0931	0.305176	18.9646
	-36.0318	0.305176	19.0472
	-36.0013	0.305176	19.0885
	-36.0315	0.610352	38.0939
	-36.0013	0.305176	19.0885
	-36.0623	0.610352	38.0107
	-36.0626	0.305176	19.0056
	-36.0934	0.610352	37.927
	-36.124	0.305176	18.923
	-36.0934	0.305176	18.9642
	-36.124	0.305176	18.923
	-36.124	0.305176	18.923
	-36.124	0.610352	37.8447
	-36.0934	0.305176	18.9642
0.5-1h-5
DA0(V)	Origin(1)mV	Origin-X(1)uV
	-35.2921	0.915527	60.2161	28.7925
	-35.3537	0.610352	39.9705
	-35.3537	0.610352	39.9705
	-35.3845	0.305176	19.9423
	-35.3848	0.610352	39.8824
	-35.4767	0.610352	39.6232
	-35.4462	0.305176	19.8552
	-35.477	0.610352	39.6224
	-35.5078	0.305176	19.7686
	-35.477	0.305176	19.8119
	-35.4773	0.305176	19.8115
	-35.5075	0.305176	19.7691
	-35.4459	0.305176	19.8557
	-35.4153	0.610352	39.7962
	-35.4153	0.610352	39.7962
	-35.415	0.610352	39.797
	-35.3842	0.305176	19.9428
	-35.3232	0.305176	20.0293
	-35.3534	0.610352	39.9713
	-35.3229	0.305176	20.0297
	-35.2921	0.305176	20.0735
	-35.2924	0.305176	20.0731
	-35.2924	0.305176	20.0731
	-35.2924	0.610352	40.1447
	-35.3229	0.610352	40.0579
	-35.3229	0.610352	40.0579
	-35.3229	0.915527	60.0846
	-35.3229	0.610352	40.0579
	-35.3229	0.610352	40.0579
	-35.3534	0.915527	59.9548
	-35.3845	0.610352	39.8832
	-35.3845	0.305176	19.9423
	-35.4153	0.610352	39.7962
	-35.4156	0.305176	19.8984
	-35.4153	0.610352	39.7962
	-35.4153	0.305176	19.8988
	-35.4462	0.305176	19.8552
	-35.4153	0.915527	59.692
	-35.477	0.305176	19.8119
	-35.477	0.305176	19.8119
	-35.477	0.610352	39.6224
	-35.5075	0.610352	39.5367
	-35.5389	0.305176	19.7251
	-35.5695	0.305176	19.6823
	-35.6	0.305176	19.6398
	-35.6927	0.305176	19.511
	-35.7236	0.610352	38.9352
	-35.7544	0.305176	19.4258
	-35.7544	0.305176	19.4258
	-35.7852	0.305176	19.3834
	-35.7852	0.610352	38.7654
	-35.7544	0.305176	19.4258
	-35.7849	0.610352	38.7662
	-35.7233	0.305176	19.4687
	-35.6927	0.305176	19.511
	-35.6927	0.305176	19.511
	-35.6924	0.305176	19.5114
	-35.6924	0.305176	19.5114
	-35.5078	0.305176	19.7686
	-35.4462	0.305176	19.8552
	-35.4462	0.305176	19.8552
	-35.4462	0.610352	39.709
	-35.4459	0.305176	19.8557
	-35.4462	0.305176	19.8552
	-35.4462	0.305176	19.8552
	-35.5075	0.610352	39.5367
	-35.5078	0.305176	19.7686
	-35.5078	0.305176	19.7686
	-35.5695	0.610352	39.3632
	-35.5695	0.305176	19.6823
	-35.5386	0.305176	19.7255
	-35.5386	0.305176	19.7255
	-35.5692	0.305176	19.6827
0.5-1h-6
DA0(V)	Origin(1)mV	Origin-X(1)uV
	-35.1996	0.305176	20.2057	53.0707
	-35.1688	0.610352	40.4983
	-35.1379	0.610352	40.5871
	-35.1376	0.305176	20.2947
	-35.076	0.305176	20.3836
	-34.953	0.915527	61.6823
	-34.953	0.610352	41.1231
	-34.9527	0.915527	61.6836
	-34.9219	0.915527	61.8185
	-34.9219	0.610352	41.2139
	-34.8608	0.305176	20.6972
	-34.8605	0.915527	62.0884
	-34.8605	0.915527	62.0884
	-34.8608	0.305176	20.6972
	-34.8602	1.2207	82.7832
	-34.83	0.610352	41.4835
	-34.83	0.915527	62.2229
	-34.8605	0.610352	41.3938
	-34.8297	1.2207	82.9625
	-34.8297	0.915527	62.2242
	-34.8297	0.915527	62.2242
	-34.8297	0.610352	41.4844
	-34.8294	0.610352	41.4853
	-34.7681	1.2207	83.3258
	-34.8294	0.915527	62.2256
	-34.7989	1.2207	83.144
	-34.8294	1.2207	82.9642
	-34.83	0.610352	41.4835
	-34.8294	1.2207	82.9642
	-34.7989	0.915527	62.3604
	-34.7681	0.915527	62.4968
	-34.7678	1.52588	104.156
	-34.7684	0.915527	62.4954
	-34.7684	0.915527	62.4954
	-34.7678	0.915527	62.4981
	-34.7678	0.610352	41.667
	-34.7678	0.915527	62.4981
	-34.7678	0.610352	41.667
	-34.7369	1.2207	83.5105
	-34.7064	0.610352	41.8489
	-34.6756	1.2207	83.8745
	-34.6759	1.2207	83.8727
	-34.7379	0.915527	62.6308
	-34.7681	1.2207	83.3258
	-34.7992	1.52588	103.924
	-34.8605	0.915527	62.0884
	-34.8914	0.610352	41.3032
	-34.8605	1.2207	82.7814
	-34.9219	0.915527	61.8185
	-34.953	0.915527	61.6823
	-34.9838	0.915527	61.5477
	-35.0146	0.915527	61.4133
	-35.0146	0.915527	61.4133
	-34.9838	0.610352	41.0333
	-34.9838	0.915527	61.5477
	-34.953	0.915527	61.6823
	-34.953	0.915527	61.6823
	-34.9524	0.915527	61.6849
	-34.8914	0.915527	61.9525
	-34.8911	0.915527	61.9538
	-34.8914	0.610352	41.3032
	-34.8914	0.305176	20.6523
	-34.8297	0.915527	62.2242
	-34.8605	0.610352	41.3938
	-34.8297	0.915527	62.2242
	-34.8602	0.915527	62.0897
	-34.8605	0.305176	20.6977
	-34.8605	0.610352	41.3938
	-34.8297	1.2207	82.9625
	-34.8605	0.305176	20.6977
	-34.8605	0.915527	62.0884
	-34.8599	0.915527	62.0911
	-34.8599	0.915527	62.0911
	-34.8297	0.610352	41.4844
	-34.8297	0.915527	62.2242
	-34.8602	0.610352	41.3947
	-34.8602	0.915527	62.0897
	-34.8605	0.610352	41.3938
	-34.8297	0.915527	62.2242
	-34.8602	0.610352	41.3947
	-34.8602	0.610352	41.3947
	-34.8297	0.305176	20.7429
	-34.7989	0.610352	41.5751
	-34.7681	0.610352	41.6661
	-34.7375	0.610352	41.7566
	-34.7684	0.305176	20.8333
	-34.7989	0.305176	20.7883
	-34.7684	0.915527	62.4954
	-34.8291	0.915527	62.2269
	-34.7989	0.305176	20.7883
	-34.7684	0.610352	41.6652
	-34.7681	0.915527	62.4968
	-34.7375	0.305176	20.8791
	-34.7678	0.610352	41.667
	-34.7372	0.305176	20.8795
	-34.7064	0.610352	41.8489
	-34.7064	0.610352	41.8489
	-34.7067	0.305176	20.9247
0.5-1h-7
	-34.2438	0.610352	43.2451	33.7284
	-34.1513	0.305176	21.7657
	-34.028	0.915527	65.866
	-33.9664	0.915527	66.1545
	-33.8742	0.915527	66.5886
	-33.8126	0.915527	66.8803
	-33.8123	0.305176	22.2955
	-33.7201	1.2207	89.7574
	-33.7198	1.2207	89.7593
	-33.689	1.52588	112.441
	-33.6588	0.915527	67.614
	-33.6581	1.83105	135.22
	-33.6893	1.2207	89.9537
	-33.6893	1.2207	89.9537
	-33.6896	1.2207	89.9518
	-33.7201	1.83105	134.626
	-33.7509	1.52588	111.948
	-33.8123	1.2207	89.1722
	-33.8123	1.52588	111.462
	-33.8129	1.2207	89.1684
	-33.8742	1.52588	110.973
	-33.9355	1.52588	110.492
	-33.9664	1.2207	88.2026
	-33.9975	1.52588	110.007
	-34.0283	1.2207	87.8161
	-34.0591	1.52588	109.527
	-34.0903	0.915527	65.5755
	-34.1208	1.52588	109.049
	-34.1827	0.915527	65.147
	-34.2133	1.52588	108.335
	-34.2749	0.915527	64.7223
	-34.3057	1.2207	86.1047
	-34.3677	0.610352	42.8666
	-34.3982	0.915527	64.1586
	-34.429	1.2207	85.3548
	-34.4904	0.915527	63.7403
	-34.4907	1.2207	84.982
	-34.552	0.915527	63.4623
	-34.5523	0.610352	42.3089
	-34.5523	1.2207	84.6114
	-34.6136	1.2207	84.2442
	-34.6448	0.610352	42.0321
	-34.6445	1.2207	84.0597
	-34.6448	0.610352	42.0321
	-34.6756	0.610352	41.9404
	-34.6756	0.915527	62.9083
	-34.7067	0.305176	20.9247
	-34.7369	0.915527	62.6353
	-34.7369	0.915527	62.6353
	-34.7372	1.52588	104.382
	-34.7687	0.610352	41.6643
	-34.7986	0.915527	62.3617
	-34.7684	0.305176	20.8333
	-34.7989	0.915527	62.3604
	-34.8294	0.915527	62.2256
	-34.7992	0.610352	41.5742
	-34.7989	0.610352	41.5751
	-34.7681	0.610352	41.6661
	-34.7678	0.915527	62.4981
	-34.7678	0.610352	41.667
	-34.7375	0.305176	20.8791
	-34.7375	0.610352	41.7566
	-34.7372	0.915527	62.6339
	-34.7678	0.610352	41.667
	-34.7678	0.610352	41.667
	-34.7369	0.915527	62.6353
	-34.7681	0.305176	20.8338
	-34.7372	0.610352	41.7575
	-34.7369	0.915527	62.6353
	-34.7369	0.610352	41.7584
	-34.7064	0.610352	41.8489
	-34.7064	0.610352	41.8489
	-34.7064	0.610352	41.8489
	-34.7064	0.610352	41.8489
	-34.7369	0.610352	41.7584
	-34.7064	0.305176	20.9252
	-34.6753	0.915527	62.9096
	-34.6753	0.610352	41.9413
	-34.6753	0.915527	62.9096
	-34.6753	0.915527	62.9096
	-34.6756	0.610352	41.9404
	-34.6448	0.305176	21.0168
	-34.6448	0.610352	42.0321
	-34.6756	0.305176	20.971
	-34.6756	0.305176	20.971
	-34.6753	0.610352	41.9413
	-34.6451	0.305176	21.0164
	-34.6753	0.610352	41.9413
	-34.6756	0.610352	41.9404
	-34.7061	0.305176	20.9256
	-34.6448	0.610352	42.0321
	-34.6756	0.305176	20.971
	-34.6448	0.610352	42.0321
	-34.6448	0.610352	42.0321
	-34.6448	0.305176	21.0168
	-34.6448	0.305176	21.0168
	-34.6445	0.305176	21.0173
	-34.6136	0.610352	42.1253
	-34.6136	0.610352	42.1253
	-34.614	0.305176	21.0628
	-34.6136	0.305176	21.0634
	-34.5831	0.305176	21.109
	-34.5523	0.610352	42.3089
	-34.5828	0.305176	21.1095
	-34.5831	0.305176	21.109
	-34.552	0.610352	42.3098
	-34.552	0.610352	42.3098
	-34.552	0.305176	21.1557
	-34.5215	0.305176	21.2015
	-34.5212	0.305176	21.2019
	-34.4904	0.610352	42.4951
	-34.4598	0.305176	21.2945
	-34.4907	0.305176	21.2479
	-34.4598	0.305176	21.2945
	-34.4904	0.915527	63.7403
	-34.4907	0.305176	21.2479
	-34.4907	0.305176	21.2479
	-34.4598	0.305176	21.2945
	-34.4904	0.305176	21.2483
	-34.429	0.305176	21.3411
	-34.4287	0.610352	42.6815
	-34.4287	0.305176	21.3415
	-34.306	0.305176	21.5281
	-34.3054	1.2207	86.1066
	-33.566	0.305176	22.6885
	-33.5965	-0.305176	-22.6411
	-33.5043	0.305176	22.7881
	-33.504	-0.305176	-22.7902
	-33.4116	-0.305176	-22.9401
	-33.3194	-0.305176	-23.0906
	-33.1961	-0.305176	-23.2935
	-33.1036	-0.610352	-46.8955
	-33.0725	-0.305176	-23.4987
	-33.0115	-0.610352	-47.2029
	-32.9803	-0.305176	-23.6529
	-32.8879	0.305176	23.8067
	-32.8882	0.305176	23.8062
	-32.7643	-0.305176	-24.0181
	-32.6102	-0.305176	-24.2822
	-32.518	-0.305176	-24.4415
	-32.4255	-0.305176	-24.6025
	-32.3328	-0.305176	-24.7648
	-32.1478	0.305176	25.0902
	-32.0865	-0.305176	-25.2013
	-31.9321	-0.305176	-25.4789
	-31.8396	-0.305176	-25.6467
	-31.6238	-0.305176	-26.0423
	-31.4697	0.305176	26.3267
	-31.4389	-0.305176	-26.3862
	-31.2848	-0.305176	-26.6763
	-31.2231	0.305176	26.7914
	-31.1923	0.305176	26.85
	-30.6686	0.305176	27.8663
	-30.545	0.305176	28.1118
	-30.4526	0.305176	28.2967
	-30.2988	-0.305176	-28.6092
	-30.2368	-0.305176	-28.7353
	-30.1447	0.305176	28.9216
	-29.9591	0.305176	29.3049
	-29.8669	0.305176	29.4972
	-29.559	-0.305176	-30.1508
	-29.4974	0.305176	30.2807
	-29.4659	0.305176	30.3485
	-29.3738	0.305176	30.5474
	-29.3433	-0.305176	-30.6158
	-29.2505	0.305176	30.8158
	-29.2505	-0.305176	-30.818
	-29.1586	-0.305176	-31.0196
	-29.1577	0.305176	31.0194
	-29.0039	0.305176	31.3597
	-28.5416	0.305176	32.4053
	-28.4491	0.305176	32.6186
	-28.3255	0.305176	32.9059
	-28.2642	0.305176	33.0493
	-28.11	0.610352	66.8234
	-27.771	0.305176	34.2262
	-27.4936	-0.305176	-34.909
	-27.4323	-0.305176	-35.0612
	-27.3703	0.305176	35.2132
	-27.1857	-0.305176	-35.68
	-26.9693	0.305176	36.2294
	-26.9077	0.305176	36.388
	-26.723	0.305176	36.868
	-26.5997	0.305176	37.1919
	-26.5384	-0.610352	-74.7161
	-26.384	-0.305176	-37.7682
	-25.8908	0.305176	39.1103
	-25.8295	-0.305176	-39.2836
	-25.6134	-0.305176	-39.8905
	-25.4285	-0.305176	-40.4172
	-25.0589	-0.305176	-41.491
	-24.9042	0.305176	41.9459
	-34.6448	0.305176	21.0168
	-34.6448	0.305176	21.0168
	-34.6445	0.305176	21.0173
	-34.6136	0.610352	42.1253
	-34.6136	0.610352	42.1253
	-34.614	0.305176	21.0628
	-34.6136	0.305176	21.0634
	-34.5831	0.305176	21.109
	-34.5523	0.610352	42.3089
	-34.5828	0.305176	21.1095
	-34.5831	0.305176	21.109
	-34.552	0.610352	42.3098
	-34.552	0.610352	42.3098
	-34.552	0.305176	21.1557
	-34.5215	0.305176	21.2015
	-34.5212	0.305176	21.2019
	-34.4904	0.610352	42.4951
	-34.4598	0.305176	21.2945
	-34.4907	0.305176	21.2479
	-34.4598	0.305176	21.2945
	-34.4904	0.915527	63.7403
	-34.4907	0.305176	21.2479
	-34.4907	0.305176	21.2479
	-34.4598	0.305176	21.2945
	-34.4904	0.305176	21.2483
	-34.429	0.305176	21.3411
	-34.4287	0.610352	42.6815
	-34.4287	0.305176	21.3415
	-34.306	0.305176	21.5281
	-34.3054	1.2207	86.1066
0.5-1h-8
	-33.566	0.305176	22.6885	-0.635568
	-33.5965	-0.305176	-22.6411
	-33.5043	0.305176	22.7881
	-33.504	-0.305176	-22.7902
	-33.4116	-0.305176	-22.9401
	-33.3194	-0.305176	-23.0906
	-33.1961	-0.305176	-23.2935
	-33.1036	-0.610352	-46.8955
	-33.0725	-0.305176	-23.4987
	-33.0115	-0.610352	-47.2029
	-32.9803	-0.305176	-23.6529
	-32.8879	0.305176	23.8067
	-32.8882	0.305176	23.8062
	-32.7643	-0.305176	-24.0181
	-32.6102	-0.305176	-24.2822
	-32.518	-0.305176	-24.4415
	-32.4255	-0.305176	-24.6025
	-32.3328	-0.305176	-24.7648
	-32.1478	0.305176	25.0902
	-32.0865	-0.305176	-25.2013
	-31.9321	-0.305176	-25.4789
	-31.8396	-0.305176	-25.6467
	-31.6238	-0.305176	-26.0423
	-31.4697	0.305176	26.3267
	-31.4389	-0.305176	-26.3862
	-31.2848	-0.305176	-26.6763
	-31.2231	0.305176	26.7914
	-31.1923	0.305176	26.85
	-30.6686	0.305176	27.8663
	-30.545	0.305176	28.1118
	-30.4526	0.305176	28.2967
	-30.2988	-0.305176	-28.6092
	-30.2368	-0.305176	-28.7353
	-30.1447	0.305176	28.9216
	-29.9591	0.305176	29.3049
	-29.8669	0.305176	29.4972
	-29.559	-0.305176	-30.1508
	-29.4974	0.305176	30.2807
	-29.4659	0.305176	30.3485
	-29.3738	0.305176	30.5474
	-29.3433	-0.305176	-30.6158
	-29.2505	0.305176	30.8158
	-29.2505	-0.305176	-30.818
	-29.1586	-0.305176	-31.0196
	-29.1577	0.305176	31.0194
	-29.0039	0.305176	31.3597
	-28.5416	0.305176	32.4053
	-28.4491	0.305176	32.6186
	-28.3255	0.305176	32.9059
	-28.2642	0.305176	33.0493
	-28.11	0.610352	66.8234
	-27.771	0.305176	34.2262
	-27.4936	-0.305176	-34.909
	-27.4323	-0.305176	-35.0612
	-27.3703	0.305176	35.2132
	-27.1857	-0.305176	-35.68
	-26.9693	0.305176	36.2294
	-26.9077	0.305176	36.388
	-26.723	0.305176	36.868
	-26.5997	0.305176	37.1919
	-26.5384	-0.610352	-74.7161
	-26.384	-0.305176	-37.7682
	-25.8908	0.305176	39.1103
	-25.8295	-0.305176	-39.2836
	-25.6134	-0.305176	-39.8905
	-25.4285	-0.305176	-40.4172
	-25.0589	-0.305176	-41.491
	-24.9042	0.305176	41.9459
0.5-1h-9
DA0(V)	Origin(1)mV	Origin-X(1)uV
	-39.8538	1.52588	117.263	112.873
	-39.8541	1.83105	140.706
	-39.9155	1.83105	140.023
	-39.9466	1.52588	116.403
	-39.9466	1.83105	139.678
	-40.0079	2.13623	162.161
	-40.0693	2.13623	161.374
	-40.1004	1.83105	137.985
	-40.1312	1.83105	137.648
	-40.1926	1.83105	136.98
	-40.1932	1.52588	114.15
	-40.2542	2.13623	159.025
	-40.3159	1.52588	113.044
	-40.3162	1.52588	113.042
	-40.3165	1.52588	113.039
	-40.3778	1.52588	112.491
	-40.4086	1.2207	89.7767
	-40.4083	1.83105	134.657
	-40.4086	1.52588	112.217
	-40.4086	1.52588	112.217
	-40.4086	1.83105	134.654
	-40.4086	1.83105	134.654
	-40.4395	1.52588	111.942
	-40.4395	1.52588	111.942
	-40.4395	1.2207	89.5571
	-40.4086	1.52588	112.217
	-40.4395	1.2207	89.5571
	-40.4391	1.52588	111.946
	-40.4086	1.52588	112.217
	-40.4086	1.2207	89.7767
	-40.3778	1.52588	112.491
	-40.4089	1.2207	89.7746
	-40.347	1.83105	135.313
	-40.347	1.83105	135.313
	-40.347	1.83105	135.313
	-40.3467	1.83105	135.317
	-40.3162	1.83105	135.644
	-40.3162	1.83105	135.644
	-40.2856	1.83105	135.974
	-40.3162	1.52588	113.042
	-40.2853	1.52588	113.319
	-40.285	1.83105	135.98
	-40.2545	1.83105	136.309
	-40.2545	1.83105	136.309
	-40.2545	1.52588	113.596
	-40.2545	1.52588	113.596
	-40.2237	1.83105	136.643
	-40.2542	1.52588	113.599
	-40.2237	1.52588	113.874
	-40.2234	1.83105	136.646
	-40.2237	1.52588	113.874
	-40.2237	1.52588	113.874
	-40.1926	1.83105	136.98
	-40.1929	1.83105	136.977
	-40.1926	1.52588	114.155
	-40.162	1.83105	137.313
	-40.1309	1.83105	137.652
	-40.162	1.2207	91.5492
	-40.1315	1.52588	114.709
	-40.1312	1.83105	137.648
	-40.1617	1.2207	91.5513
	-40.1617	1.52588	114.435
	-40.1312	1.52588	114.712
	-40.162	1.2207	91.5492
	-40.1004	1.83105	137.985
	-40.1004	1.52588	114.992
	-40.1004	1.52588	114.992
	-40.1001	1.52588	114.995
	-40.1004	1.52588	114.992
	-40.1004	1.2207	91.9974
	-40.0699	1.2207	92.2201
	-40.1004	1.2207	91.9974
	-40.1001	1.2207	91.9995
	-40.0388	1.52588	115.555
	-40.0693	1.52588	115.276
	-40.0388	0.915527	69.3388
	-40.0388	1.2207	92.4477
	-40.0385	1.2207	92.4499
	-40.0079	1.2207	92.6745
	-40.0079	0.915527	69.5088
	-39.9771	1.2207	92.9011
	-39.9771	0.915527	69.6788
	-39.9158	1.2207	93.3537
	-39.946	1.2207	93.1304
	-39.946	1.2207	93.1304
	-39.9152	1.2207	93.3581
	-39.8843	1.52588	116.98
	-39.8846	0.915527	70.1916
	-39.8535	1.52588	117.266
	-39.8535	1.2207	93.8159
	-39.823	0.915527	70.5353
	-39.7922	1.2207	94.2729
	-39.8227	1.2207	94.0452
	-39.7922	0.915527	70.7077
	-39.761	1.2207	94.5064
	-39.7305	1.2207	94.7352
	-39.6994	1.2207	94.9691
	-39.6689	1.2207	95.199
	-39.6689	1.2207	95.199
0.5-1h-10
DA0(V)	Origin(1)mV	Origin-X(1)uV
	-40.1929	-0.305176	-22.836	4.86692
	-40.1624	-0.305176	-22.8913
	-40.2545	-0.305176	-22.7247
	-40.2545	0.305176	22.7229
	-40.3162	-0.305176	-22.6138
	-40.347	-0.305176	-22.5587
	-40.4395	0.305176	22.392
	-40.5936	-0.305176	-22.1219
	-40.5936	0.610352	44.2385
	-40.6552	-0.305176	-22.0142
	-40.6857	0.305176	21.9592
	-40.748	-0.610352	-43.7073
	-40.7169	0.305176	21.905
	-40.7788	-0.610352	-43.6007
	-40.7788	-0.305176	-21.7995
	-40.8093	0.305176	21.7451
	-40.8401	-0.305176	-21.6938
	-40.8398	0.305176	21.6926
	-40.8398	0.305176	21.6926
	-40.8398	0.305176	21.6926
	-40.8707	0.305176	21.6395
	-40.871	-0.305176	-21.6407
	-40.8707	0.305176	21.6395
	-40.8093	0.305176	21.7451
	-40.8401	0.305176	21.6921
	-40.8405	-0.610352	-43.388
	-40.8405	-0.610352	-43.388
	-40.7785	-0.305176	-21.8
	-40.7477	-0.305176	-21.8533
	-40.7172	-0.305176	-21.9062
	-40.7169	0.305176	21.905
	-40.7477	-0.305176	-21.8533
	-40.7477	0.305176	21.8515
	-40.7477	0.305176	21.8515
	-40.7477	-0.610352	-43.7084
	-40.6552	-0.305176	-22.0142
	-40.6244	0.305176	22.0662
	-40.5936	-0.305176	-22.1219
	-40.4083	-0.610352	-44.9004
	-40.2853	-0.305176	-22.6693
	-40.3165	-0.305176	-22.6133
	-40.347	0.610352	45.1119
	-40.4391	0.305176	22.3928
	-40.408	0.610352	44.8943
	-40.4092	-0.305176	-22.4477
	-40.4391	0.610352	44.7837
	-40.4398	0.305176	22.3915
	-40.4703	0.305176	22.3374
	-40.5316	0.610352	44.4565
	-40.5319	0.305176	22.2286
	-40.5316	0.305176	22.2291
	-40.5011	0.915527	66.8434
	-40.563	0.305176	22.1739
	-40.563	0.305176	22.1739
	-40.5933	0.305176	22.1207
	-40.563	0.305176	22.1739
	-40.6244	0.305176	22.0662
	-40.6247	0.610352	44.1296
	-40.686	0.305176	21.9587
	-40.8093	0.305176	21.7451
	-40.8401	0.305176	21.6921
	-40.8401	0.305176	21.6921
	-40.8401	0.610352	43.3824
	-40.8713	-0.305176	-21.6402
	-40.871	0.305176	21.639
	-40.8713	0.305176	21.6385
	-40.9018	-0.305176	-21.5879
	-40.871	-0.305176	-21.6407
1-1h-1
DA0(V)	Origin(1)mV	Origin-X(1)uV	#VALUE!
	-34.9527	0.915527	307.065	222.947
	-35.0455	0.305176	101.607
	-35.0458	0.305176	101.604
	-35.1071	0.305176	101.108
	-35.1379	0.610352	201.71
	-35.1996	0.915527	301.064
	-35.2615	1.2207	399.42
	-35.3848	0.915527	296.639
	-35.477	1.2207	392.598
	-35.5389	1.52588	488.307
	-35.6622	1.2207	386.829
	-35.7547	1.52588	479.956
	-35.8774	1.2207	380.231
	-35.9393	1.2207	378.354
	-35.9705	0.915527	283.071
	-36.0318	1.2207	375.567
	-36.0934	1.2207	373.722
	-36.1249	1.52588	465.96
	-36.2167	1.52588	462.553
	-36.3089	1.52588	459.157
	-36.3712	1.52588	456.876
	-36.4636	0.915527	272.13
	-36.525	1.2207	361.048
	-36.5866	0.915527	269.467
	-36.5869	1.2207	359.266
	-36.6177	0.610352	179.206
	-36.6791	0.915527	267.482
	-36.6791	0.915527	267.482
	-36.7102	0.610352	177.886
	-36.741	0.610352	177.449
	-36.8024	0.610352	176.58
	-36.8027	0.305176	88.2914
	-36.8332	0.610352	176.146
	-36.864	0.610352	175.713
	-36.8948	0.610352	175.28
	-36.8948	0.610352	175.28
	-36.9565	0.305176	87.2126
	-36.9876	0.305176	86.996
	-37.0178	0.610352	173.565
	-37.049	0.305176	86.5701
	-37.0795	0.610352	172.712
	-37.0798	0.305176	86.3572
	-37.1103	0.305176	86.1469
	-37.1106	0.305176	86.1448
	-37.1106	0.305176	86.1448
	-37.326	0.305176	84.6742
	-37.3264	0.305176	84.6715
	-37.3572	0.305176	84.4633
	-37.3572	0.305176	84.4633
	-37.388	0.305176	84.2556
	-37.3877	0.305176	84.2576
	-37.388	0.610352	168.504
	-37.4188	0.305176	84.0484
	-37.4493	0.305176	83.8437
	-37.4493	0.305176	83.8437
	-37.3883	0.305176	84.2536
	-37.3877	0.915527	252.752
1-1h-2
DA0(V)	Origin(1)mV	Origin-X(1)uV
	-40.6857	0.305176	64.7311	415.331
	-40.6238	0.305176	65.0522
	-40.5316	0.305176	65.5335
	-40.4697	0.610352	131.712
	-40.347	0.305176	66.5077
	-40.285	0.610352	133.671
	-40.1929	0.305176	67.332
	-40.1309	0.915527	202.983
	-40.0696	0.610352	135.992
	-40.0076	1.2207	273.313
	-39.946	0.915527	206.005
	-39.8843	0.915527	207.024
	-39.8227	0.610352	138.703
	-39.6997	0.915527	210.102
	-39.6378	1.52588	351.878
	-39.5456	0.915527	212.706
	-39.4528	1.2207	285.707
	-39.422	1.52588	358.001
	-39.3912	1.2207	287.118
	-39.2679	1.52588	362.438
	-39.2062	1.83105	437.057
	-39.1446	1.52588	366.028
	-39.0527	1.2207	294.993
	-39.0219	2.13623	517.448
	-39.0521	1.52588	368.745
	-38.96	1.52588	371.47
	-38.898	1.83105	447.959
	-38.8055	1.2207	300.88
	-38.6826	1.83105	455.739
	-38.6514	1.83105	456.877
	-38.5593	1.52588	383.561
	-38.4668	1.83105	463.669
	-38.4052	1.83105	465.958
	-38.3432	1.52588	390.244
	-38.2504	1.83105	471.759
	-38.1277	1.83105	476.409
	-38.0966	1.83105	477.595
	-38.0353	2.13623	559.91
	-38.0045	1.83105	481.124
	-37.9428	2.13623	564.066
	-37.9736	2.13623	562.679
	-37.9733	1.83105	482.326
	-37.912	1.83105	484.695
	-37.8809	1.83105	485.902
	-37.8503	1.83105	487.092
	-37.8195	1.83105	488.293
	-37.7881	1.83105	489.52
	-37.6959	1.2207	328.787
	-37.5729	1.52588	415.03
	-37.5418	2.13623	582.44
	-37.5113	1.83105	500.472
	-37.5113	2.13623	583.862
	-37.511	1.83105	500.484
	-37.4799	1.52588	418.127
	-37.3877	1.83105	505.441
	-37.3575	2.13623	591.084
	-37.4188	2.13623	588.195
	-37.4188	1.83105	504.186
	-37.3572	1.83105	506.675
	-37.3572	1.83105	506.675
	-37.3267	2.44141	677.164
	-37.388	1.83105	505.429
	-37.3264	1.83105	507.924
	-37.265	2.13623	595.471
	-37.2955	2.13623	594.021
	-37.2952	2.13623	594.035
	-37.2644	2.13623	595.5
	-37.2339	2.44141	682.206
	-37.2647	2.13623	595.485
	-37.2647	2.13623	595.485
	-37.2647	2.13623	595.485
	-37.2647	2.13623	595.485
	-37.265	2.13623	595.471
1-1h-3
DA0(V)	Origin(1)mV	Origin-X(1)uV
	-40.2539	2.74658	602.844	1131.86
	-40.1617	2.74658	607.303
	-40.0693	3.35693	747.701
	-39.9771	2.74658	616.331
	-39.9152	2.74658	619.389
	-39.8233	3.35693	762.55
	-39.8541	3.35693	760.675
	-39.8233	3.35693	762.55
	-39.8535	3.35693	760.711
	-39.823	3.35693	762.568
	-39.7919	3.66211	833.931
	-39.7919	3.66211	833.931
	-39.7305	3.66211	838.034
	-39.7302	3.66211	838.054
	-39.6994	3.66211	840.12
	-39.6689	3.66211	842.171
	-39.6381	3.96729	914.564
	-39.6075	3.66211	846.314
	-39.5764	3.96729	919.086
	-39.5761	3.96729	919.108
	-39.5761	3.96729	919.108
	-39.4839	3.96729	925.907
	-39.422	3.96729	930.5
	-39.3298	3.96729	937.384
	-39.2676	4.57764	1086.9
	-39.1754	3.96729	949.025
	-39.0521	4.27246	1032.11
	-38.9594	4.57764	1114.01
	-38.8669	4.27246	1047.5
	-38.7128	4.57764	1136.19
	-38.5895	4.57764	1147.44
	-38.4357	4.27246	1084.24
	-38.3121	4.27246	1095
	-38.1577	4.57764	1187.74
	-38.0038	4.57764	1202.44
	-37.8497	4.27246	1136.24
	-37.6648	3.66211	988.498
	-37.3254	4.27246	1184.87
	-37.0483	4.27246	1211.41
	-36.8323	4.27246	1232.51
	-36.5552	3.96729	1170.15
	-36.2778	3.96729	1196.39
	-35.9692	3.96729	1226.27
	-35.6302	3.66211	1163.08
[truncated: 6,388 more rows]
